# Supplementary material
Source: PubMed Central journal article supplement (PMC6020124)
Supplement: SC-007-C6SC01146B-s001.pdf [file SC-007-C6SC01146B-s001.pdf]

# **Luminescent Metal Complexes Featuring Photophysically Innocent Boron Cluster Ligands — SI**

Kent O. Kirlikovali, Jonathan C. Axtell, Alejandra Gonzalez, Alice C. Phung, Saeed I. Khan, and  
Alexander M. Spokoyny\*

Department of Chemistry and Biochemistry, University of California, Los Angeles  
607 Charles E. Young Drive East, Los Angeles, California 90095-1569

\*E-mail: [spokoyny@chem.ucla.edu](mailto:spokoyny@chem.ucla.edu)

Supporting Information (SI)

## Table of Contents

|                                                                                                    |       |
|----------------------------------------------------------------------------------------------------|-------|
| General Considerations                                                                             | 3     |
| Materials                                                                                          | 3     |
| Instruments                                                                                        | 3     |
| Determination of molar extinction coefficients                                                     | 4     |
| Preparation of PMMA films                                                                          | 4     |
| X-ray data collection and processing parameters                                                    | 4     |
| Cyclic Voltammetry                                                                                 | 4     |
| DFT Calculations                                                                                   | 5     |
| Experimental                                                                                       | 5     |
| UV-Vis Spectra of <i>o</i> -carborane ( <b>1</b> ) and 1,1'-bis( <i>o</i> -carborane) ( <b>2</b> ) | 16    |
| Molecular structures of compounds mentioned in manuscript                                          | 16    |
| Molecular structures of Ir(III)-based complexes containing carboranyl functional groups            | 17    |
| Single crystal X-ray structures and data of <b>3a-3c</b>                                           | 17    |
| Analysis of X-ray data for <b>3a-3c</b>                                                            | 18    |
| Scheme for oxidation of <b>3c</b>                                                                  | 21    |
| Scheme for formation of side products during the synthesis of <b>3a-3c</b>                         | 22    |
| UV-Vis spectra of <b>3a-3c</b>                                                                     | 23    |
| DFT analysis for <b>3a-3c</b>                                                                      | 24    |
| Single crystal X-ray structure and solid-state stacking of <b>4a</b>                               | 24    |
| Analysis of X-ray data for <b>4a</b>                                                               | 25    |
| Single crystal X-ray structure for <b>7</b>                                                        | 26    |
| Single crystal X-ray structure and data for <b>8</b>                                               | 27    |
| Thermogravimetric analysis (TGA) of <b>8</b>                                                       | 28    |
| Coordinates for geometry optimized structures of <b>3a-3c, 8</b>                                   | 28    |
| References                                                                                         | 42-43 |

**General considerations.** All experiments were performed air and moisture free under an atmosphere of nitrogen using standard Schlenk and cannula techniques. THF used for reactions and MeCN used for cyclic voltammetry was purified and dried using a Grubbs column.<sup>[1]</sup> All post-Schlenk work-up and characterization was performed under ambient conditions. The “ambient conditions” for this manuscript refer to room temperature (20 - 25 °C) and uncontrolled laboratory air. Thin-layer chromatography (TLC) samples for carborane-containing compounds were stained with 1 wt. % PdCl<sub>2</sub> in 6M HCl and were developed with heat. Elemental analyses were carried out by Atlantic Microlab, Inc. in Norcross, GA.

**Materials.** Deuterated solvents were purchased from Cambridge Isotope Laboratories and used as received. MilliQ water described in this manuscript refers to purified potable water with a resistivity at 25 °C of  $\leq 18.2 \text{ M}\Omega\cdot\text{cm}$ . Pd(cod)Cl<sub>2</sub><sup>[2]</sup> and Pt(cod)Cl<sub>2</sub><sup>[3]</sup> were made according to literature procedures. *O*-carborane (1,2-C<sub>2</sub>B<sub>10</sub>H<sub>12</sub>) was purchased from Boron Specialties (USA). K<sub>2</sub>[PtCl<sub>6</sub>], PdCl<sub>2</sub>, Ni(dppe)Cl<sub>2</sub>, 1,2-bis(diphenylphosphino)ethane (dppe), 2,2'-bipyridine (bpy), 4,4'-di-*tert*-butyl-2,2'-bipyridine (dtb-bpy), 1,5-cyclooctadiene (cod), iodine, ethyl magnesium bromide, Pd(PPh<sub>3</sub>)<sub>2</sub>Cl<sub>2</sub>, and tetrabutylammonium hexafluorophosphate ( $\geq 99.0\%$ , electrochemical grade) were purchased from Sigma-Aldrich. Glass-backed Silica Gel 60 GLA TLC plates were purchased from Fisher Scientific. Aluminum oxide (activated, basic, Brockmann Grade I, 58 Å, 60 mesh powder) was purchased from Alfa Aesar. All reagents were used as received unless otherwise indicated.

**Instruments.** <sup>1</sup>H NMR spectra were obtained on a Bruker AV500 or a Bruker AV400 spectrometer; <sup>13</sup>C{<sup>1</sup>H} NMR spectra were obtained on a Bruker AV500 spectrometer; <sup>11</sup>B and <sup>31</sup>P NMR spectra were obtained on a Bruker DRX500 spectrometer. Bruker Topspin software was used to process the NMR data. <sup>1</sup>H and <sup>13</sup>C{<sup>1</sup>H} NMR spectra were referenced to residual solvent resonances in deuterated solvents (CD<sub>2</sub>Cl<sub>2</sub>: <sup>1</sup>H, 5.320 ppm; <sup>13</sup>C, 53.840 ppm; CDCl<sub>3</sub>: <sup>1</sup>H, 7.260 ppm; <sup>13</sup>C, 73.840 ppm; THF-d<sup>8</sup>: <sup>1</sup>H, 5.020 ppm; <sup>13</sup>C, 61.500 ppm; Note: due to high humidity H<sub>2</sub>O resonances are often present). <sup>11</sup>B and <sup>31</sup>P NMR spectra were referenced to BF<sub>3</sub>·Et<sub>2</sub>O (0 ppm) and H<sub>3</sub>PO<sub>4</sub> (0 ppm) standards, respectively. Mass spectrometry data was acquired using a Thermo Instruments Exactive Plus with IonSense ID-CUBE DART source instrument (compound **4a** and **4b**), and a Thermo Scientific™ Q-Exactive™ Plus instrument with a quadrupole mass filter and Orbitrap mass analyzer (compound **8**). UV–Vis spectra were

recorded on a Hewlett-Packard 4853 diode array spectrometer. Phosphorescence lifetime measurements for **8** were performed by a time-correlated single-photon counting method using an IBH fluorocube lifetime instrument equipped with a 405 nm LED excitation source. Quantum yield measurements were carried out using a Hamamatsu C9920 system equipped with a xenon lamp, calibrated integrating sphere, and model C10027 photonic multichannel analyzer. Steady-state emission measurements of **8** as a solid, in the thin film, and in solution at 77 K were performed using a Photon Technology International QuantaMaster spectrofluorimeter.

**Preparation of PMMA thin film:** A solution of PMMA (0.085 g, 120 kDa) in toluene (1.5 mL) was thermally sonicated for 3 hours at 40°C, or until PMMA was completely dissolved. Next, **8** (0.0017 mg, 2 wt. %) was added to the solution and sonicated for 5 minutes, yielding an orange solution. The solution of **8**/PMMA was spin coated on a quartz substrate (3-5 drops, 800-1,000 RPM, 30 seconds), and this was repeated until the film was thick enough emit light under  $\lambda = 365$  nm excitation in a dark room under ambient conditions.

**Determination of molar extinction coefficients:** Extinction coefficients were determined through a series of 5 dilutions with a maximum absorption between 0.1 and 0.7.

**X-ray data collection and processing parameters.** For **3a-3c**, **4a**, and **8** a single crystal was mounted on a nylon loop using perfluoropolyether oil and cooled rapidly to 100 K with a stream of cold dinitrogen. Diffraction data were measured using a Bruker APEX-II CCD diffractometer using Mo- $K\alpha$  radiation. The cell refinement and data reduction were carried out using Bruker SAINT and the structure was solved with SHELXS-97. All subsequent crystallographic calculations were performed using SHELXL-2013.

**Cyclic voltammetry.** Cyclic voltammetry was performed on **8** and using a CH Instruments Model 600D potentiostat with a glassy carbon disc working electrode, platinum wire counter electrode, and Ag/AgCl wire reference in a saturated solution of KCl in MeCN. All experiments were conducted in 0.1M [ $N^n$ Bu<sub>4</sub>]PF<sub>6</sub>/MeCN with 0.5 mM analyte concentrations. MeCN solutions were degassed by sparging with argon for 10 minutes, and the cyclic voltammetry was performed under constant flow of argon gas. A scan rate of 0.1 mV/s was used with ferrocene as

an internal standard.

**DFT Calculations.** All optimized geometries were calculated from crystallographic data and optimized with DFT calculations using standard triple- $\xi$  polarization (TZP) basis sets available in the Amsterdam Density Functional 2014.04 Rev. 44409 (ADF)<sup>[4]</sup> software suite, with Becke<sup>[5]</sup> and Perdew<sup>[6]</sup> (BP) Slater-type orbitals (STOs) on a 6 core Apple computer. The local density approximation (LDA) was made with BP and exchange and correlation corrections available by default in the ADF 2014.04 suite. Single point calculations were performed using BP86 level of theory with the Grimme D3 dispersion correction<sup>[7]</sup> and a TZP basis set. Electron cores were frozen to 2p for Ni, Pd, and Pt; 1s for B, C, and N; and 2s for P atoms. Electron spins were restricted for  $S_0$  calculations, and electron spins were unrestricted for  $T_1$  calculations. Relativistic correlations were made using Zero-Order Relativistic Approximation (ZORA) for Pt (**3c** and **8**).

## Experimental

### 1,1'-Bis(*o*-carborane) [2].

*O*-carborane (5.00 g, 34.67 mmol) was added to a 500mL Schlenk flask, which was then evacuated and backfilled with  $N_2$  three times. Dry toluene (200 mL) was transferred *via* cannula, and the contents were stirred to give a slightly cloudy white solution. Next,  $^nBuLi$  (28.4 mL, 71.0 mmol, 2.5 M in hexane) was added slowly *via* syringe. The solution immediately turned milky white and the mixture was allowed to stir at room temperature for 21 hours.  $CuCl$  powder (9.44 g, 95.3 mmol) was then added, causing the reaction mixture to immediately turn gray and then dark red over the course of 30 minutes. This suspension was stirred for 3 days, after which toluene was removed by rotary evaporation.  $CH_2Cl_2$  (50 mL) and aqueous  $HCl$  (120 mL, 12 M) were added and stirred vigorously for 3 hours, or until the color turned green (indicating the formation of  $CuCl$ ). The organic layer was separated, and the aqueous layer was washed with  $CH_2Cl_2$  (3 x 100mL). The combined organic fractions were dried over  $Na_2SO_4$ , filtered, and dried *in vacuo*, yielding a light brown solid (4.60 g). This crude product was purified by stepwise vacuum sublimation: sublimation under dynamic vacuum (0.20 Torr) at 75°C for 1 hour yielded crystals of unreacted *o*-carborane. After removal, the remaining solid was heated to 180°C under dynamic vacuum (0.20 Torr) for 1-2 hours. Pure product in the form of white crystals was

isolated from the cold finger and dried under vacuum overnight (3.61 g, 73%).  $^1\text{H NMR}$  ( $\text{CD}_2\text{Cl}_2$ , 500 MHz):  $\delta$  3.90 (s, 2H,  $\text{CH}_{\text{cage}}$ ), 3.40-1.40 (br. m, 18H, BH);  $^{11}\text{B NMR}$  ( $\text{CD}_2\text{Cl}_2$ , 160 MHz): 2.38 (4B), -8.98 (2B), -10.00 (6B), -11.17 (4B), 12.24 (2B), -13.29 (2B);  $^{13}\text{C NMR}$  ( $\text{CD}_2\text{Cl}_2$ , 125 MHz): 72.31, 63.25. Synthesis adapted from Reference 8.

### **9,12-diiodo-*o*-carborane [5].**

To a 200 mL Schlenk flask was added *o*-carborane (2.88 g, 20.0 mmol) and one equivalent  $\text{I}_2$  (5.08 g, 20.0 mmol). The flask was evacuated and backfilled with  $\text{N}_2$  at least three times to remove residual moisture. Dry  $\text{CH}_2\text{Cl}_2$  (100 mL) was transferred to the reaction vessel *via* cannula and the contents of the flask were stirred to give a purple solution. Next,  $\text{AlCl}_3$  (0.533 g, 4.0 mmol) was added under positive  $\text{N}_2$  flow, and the reaction was refluxed until the color fades to pale yellow (~2-3 hours). A second equivalent of  $\text{I}_2$  (5.08 g, 20.0 mmol) and  $\text{AlCl}_3$  (0.267g, 2.0 mmol) were added, and the reaction was heated to  $45^\circ\text{C}$  and allowed to reflux overnight. The next day, the dark brown reaction mixture was diluted with  $\text{H}_2\text{O}$  (50 mL, or until effervescence subsided), and unreacted  $\text{I}_2$  was quenched with  $\text{Na}_2\text{SO}_3$  (0.708 g, 5.62 mmol). After stirring for 10 minutes, the purple organic layer was separated and the aqueous layer was washed with  $\text{CH}_2\text{Cl}_2$  (40 mL x 3) and dried over  $\text{MgSO}_4$ . If the solution is still colored, activated charcoal can be added. This solution was passed through a silica plug and eluted with  $\text{CH}_2\text{Cl}_2$  to give a light gray solution. Solvent was then removed by rotary evaporation, yielding a lavender solid. The crude product was then sublimed under vacuum ( $150\text{-}160^\circ\text{C}$ , 5-6 hours, 0.20 Torr) to afford a white solid (6.52 g, 82%) on the cold finger, which was isolated and dried under vacuum overnight before further use. Alternatively, the crude product can be purified by recrystallization by layering  $\text{CH}_2\text{Cl}_2$  with an equal volume of hexane and storing at  $-20^\circ\text{C}$ . After 3-4 hours, the white crystals can be filtered off and washed with cold hexane.  $^1\text{H NMR}$  ( $\text{CDCl}_3$ , 500 MHz)  $\delta$  3.99 (s, 2H, CH), 3.50-1.80 (m, 9H, BH);  $^{11}\text{B NMR}$  ( $\text{CDCl}_3$ , 160 MHz): -5.50 (d, 2B), -12.67 (d, 4B), -14.01 (s, 3B), -14.89 (s, 1B);  $^{13}\text{C NMR}$  ( $\text{CDCl}_3$ , ppm): 51.71. Synthesis adapted from Reference 9.

### **9,12-diethyl-*o*-carborane [6].**

To a 50 mL Schlenk flask was added 9,12-diiodo-*o*-carborane (1.98 g, 5.00 mmol) and  $\text{PdCl}_2(\text{PPh}_3)_2$  (0.07091 g, 0.10 mmol). The flask was left under vacuum for 30 minutes, then

backfilled with N<sub>2</sub>. Dry THF (20 mL) was added *via* cannula, and the flask was stirred in an ice bath for 10 minutes. EtMgBr (7.9 mL, 3.0 M, 23.7 mmol) was then slowly added. The resulting mixture was gently refluxed for 10 days and monitored by GC-MS. The reaction was cooled to room temperature and quenched with H<sub>2</sub>O, then charged with diethyl ether (150 mL). The organic layer was separated, and the aqueous layer was extracted with diethyl ether (3 x 80mL). Aqueous HCl (5%, 30 mL) was added to the organic layer, and the organic layer was separated and solvent removed *via* rotary evaporation. The crude product was purified *via* silica column chromatography (ethyl acetate:hexanes 1:9). Solvent was removed under vacuum to afford the desired product as a low-melting red solid (0.250g, 31%). <sup>1</sup>H NMR (CD<sub>2</sub>Cl<sub>2</sub>, 500 MHz) δ 3.47 (2H, s, CH<sub>cage</sub>), 3.00-1.20 (8H, br. m, BH), 0.89 (t, 6H, CH<sub>3</sub>), 0.71 (q, 4H, CH<sub>2</sub>); <sup>11</sup>B NMR (CD<sub>2</sub>Cl<sub>2</sub>, 160 MHz): 9.64 (s, 2B), -8.43 (d, 2B), -14.24 (d, 4B), -16.21 (d, 2B); <sup>13</sup>C NMR (CDCl<sub>3</sub>, 125 MHz): 47.71, 13.52, 9.35 (br). Synthesis adapted from Reference 9.

#### **9,9',12,12'-Tetra-ethyl-1,1'-bis(*o*-carborane) [7].**

To a clean 25 mL Schlenk flask, 9,12-diethyl-*o*-carborane (0.500 g, 2.50 mmol) was added, and the flask was cooled to -78°C. The flask was evacuated and backfilled with N<sub>2</sub> five times, followed by the addition of dry toluene (10 mL) *via* cannula, yielding a yellow solution. Next, <sup>n</sup>BuLi (2.1 mL, 5.25 mmol, 2.5 M in hexanes) was added *via* syringe. The mixture, which immediately turned clear and gradually acquired a yellow color, was allowed to warm and was stirred at room temperature for 24 hours. CuCl was added (0.680 g, 6.87 mmol), and the resulting dark green suspension was allowed to stir for 3 days. Toluene was then removed under reduced pressure, and CH<sub>2</sub>Cl<sub>2</sub> (5 mL) and aqueous HCl (15 mL, 10 M) were added and stirred vigorously to quench the resulting dark green reaction mixture. The mixture was allowed to stir until the aqueous layer turned light green (~3h). The organic layer was separated, and the aqueous layer was washed with CH<sub>2</sub>Cl<sub>2</sub> (3 x 15mL). The combined organic fractions were dried over Na<sub>2</sub>SO<sub>4</sub>, filtered, and concentrated to dryness yielding a yellow-orange solid. The crude product was eluted through a pad of silica with hexanes and concentrated to dryness, yielding a pale yellow solid (0.385 g). Minimal pentane (2-3 mL) was added to the solid and stored in the freezer (-20°C) for recrystallization. The next day, pentane was decanted yielding white crystals. The supernatant was stored in the freezer and decanted after four hours, and this process was repeated once more yielding pure white crystals (Total: 0.231 g, 46%). <sup>1</sup>H NMR (CD<sub>2</sub>Cl<sub>2</sub>, 500

MHz)  $\delta$  3.72 (s, 2H, cage CH), 3.4-1.2 (br. m, 16H, BH), 0.86 (m, 12H, CH<sub>3</sub>), 0.69 (m, 8H, CH<sub>2</sub>); <sup>11</sup>B NMR (CD<sub>2</sub>Cl<sub>2</sub>, 160 MHz): 10.04 (s, 4B), -8.58 (d, 4B), -12.09 (m, 12B); <sup>13</sup>C NMR (CD<sub>2</sub>Cl<sub>2</sub>, 125 MHz): 65.48, 56.19, 13.32, 8.36. Single crystals for X-ray diffraction analysis were grown from a concentrated solution of pentane stored in a freezer at -15°C overnight.

### **Pd(dppe)Cl<sub>2</sub>**

Pd(cod)Cl<sub>2</sub> (0.286 g, 1.00 mmol) and CH<sub>2</sub>Cl<sub>2</sub> (6 mL) were combined and stirred in a large vial to give a yellow slurry, and 1,2-bis(diphenylphosphino)ethane (dppe, 0.398 g, 1.00 mmol) was then added. The color quickly changed to a lighter shade of yellow. After 15 minutes, hexane (14 mL) was added, and the vial was capped and stored in the freezer (-20°C) for 4 hours. The solid was filtered and washed with pentane (5 mL x 3) yielding the pale yellow product (0.517 g, 90%). <sup>1</sup>H NMR (CD<sub>2</sub>Cl<sub>2</sub>, 400 MHz): 7.87 (8H, m), 7.60 (4H, m), 7.53 (8H, m), 2.47 (4H, d, CH<sub>2</sub>); <sup>31</sup>P NMR (CD<sub>2</sub>Cl<sub>2</sub>, 121 MHz): 64.7. Synthesis adapted from Reference 10.

### **Pt(dppe)Cl<sub>2</sub>**

Pt(cod)Cl<sub>2</sub> (0.374 g, 1.00 mmol) and CH<sub>2</sub>Cl<sub>2</sub> (6 mL) were combined and stirred in a large vial to give a white slurry, and 1,2-bis(diphenylphosphino)ethane (dppe, 0.398 g, 1.00 mmol) was then added. After 15 minutes, hexane (14 mL) was added, and the vial was capped and stored in the freezer (-20°C) for 4 hours. The solid was filtered and washed with pentane (5 mL x 3) yielding the white product (0.576 g, 87%). <sup>1</sup>H NMR (CD<sub>2</sub>Cl<sub>2</sub>, 400 MHz): 7.86 (8H, m), 7.56 (4H, m), 7.52 (8H, m), 2.36 (4H, d, CH<sub>2</sub>); <sup>31</sup>P NMR (CD<sub>2</sub>Cl<sub>2</sub>, 121 MHz): 41.8 (<sup>1</sup>J<sub>Pt-P</sub> = 3622 Hz). Synthesis adapted from the synthesis for **Pd(dppe)Cl<sub>2</sub>** in Reference 10.

### **Pt(dtb-bpy)Cl<sub>2</sub>**

Pt(cod)Cl<sub>2</sub> (0.350 g, 0.935 mmol), 4,4'-ditertbutyl-2,2'-bipyridine (dtb-bpy, 0.251 g, 0.935 mmol), and 8 mL methanol were stirred in a sealed tube at 75°C for 22 hours. As the suspension warmed up, the color changed to yellow-orange and eventually turned bright yellow. The tube was cooled to room temperature in a water bath and the yellow solid was filtered. After washing with diethyl ether (3 mL x 5) to remove 1,5-cyclooctadiene, the yellow product was dried under vacuum overnight (0.458 g, 92%). <sup>1</sup>H NMR (CD<sub>2</sub>Cl<sub>2</sub>, 500 MHz): 9.52 (2H, d), 7.91



(2H, d), 7.57 (2H, dd), 1.44 (18H, s, CH<sub>3</sub>); <sup>13</sup>C NMR (CD<sub>2</sub>Cl<sub>2</sub>, 126 MHz): 164.9, 157.2, 149.3, 124.8, 119.9, 36.2, 30.3. Synthesis adapted from Reference 11.

### Ni(bc)(dppe) [3a].

1,1'-Bis-(*o*-carborane) (0.100 g, 0.349 mmol) was added to a 10 mL Schlenk flask, which was then evacuated and backfilled with N<sub>2</sub> three times. Dry THF (4 mL) was transferred to the flask *via* cannula to give a clear solution. While stirring at room temperature, <sup>n</sup>BuLi (0.45 mL, 1.6 M, 0.72 mmol) was added drop-wise *via* syringe, giving a dark yellow solution. The reaction was then heated at 60°C for 3 hours, and the color slowly turned to a lighter yellow. After 3 hours, the flask was allowed to cool to room temperature yielding a golden-yellow solution. To a separate 25 mL Schlenk flask was added Ni(dppe)Cl<sub>2</sub> (0.184 g, 0.349 mmol), and the flask was evacuated and backfilled with N<sub>2</sub> three times. Dry THF (20 mL) was then transferred *via* cannula to give a red-orange slurry. This flask was cooled to -78°C and stirred for 5 minutes. The dilithio-bis-carborane mixture was added dropwise (~1 mL/min) to the cold Ni(dppe)Cl<sub>2</sub> slurry, and the reaction was allowed to warm up to room temperature and react overnight, giving a deep orange solution the following day. The solvent was removed *via* rotary evaporation after 18 hours, and the orange solid was dissolved in 5-10 mL CH<sub>2</sub>Cl<sub>2</sub> and passed through a pad of Celite. After removal of solvent, crude orange product (0.160 g) remained and was purified *via* column chromatography: a wide 60 mL filter frit was loaded halfway with silica in hexanes, and the crude product was dissolved in the minimum amount of 1:1 CH<sub>2</sub>Cl<sub>2</sub>:hexanes (R<sub>f</sub> = 0.50) and loaded on the silica. Any unreacted bis-carborane (R<sub>f</sub> = 0.90) can be removed as the initial clear/light yellow elution, and the desired product can be cleanly collected as the orange band that follows. The orange solution was concentrated to dryness to give a yellow solid (0.125 g, 49%) that was dried under vacuum overnight. <sup>1</sup>H NMR (CD<sub>2</sub>Cl<sub>2</sub>, 500 MHz) δ 7.77 (br. t, 8H, Ar), 7.64 (t, 4H, Ar), 7.54 (t, 8H, Ar), 4.0-0.6 (br. m, 20H, BH), 2.0 (d, 4H, CH<sub>2</sub>, <sup>2</sup>J<sub>PH</sub> = 15.60 Hz); <sup>11</sup>B NMR (CD<sub>2</sub>Cl<sub>2</sub>, 160 MHz) -1.96 (d, 2B), -3.83 (d, 2B), -8.35 (d, 12B), -10.62 (m, 4B); <sup>13</sup>C NMR (CD<sub>2</sub>Cl<sub>2</sub>, 125 MHz) 134.62 (t, <sup>2</sup>J<sub>PC</sub> = 5.2 Hz), 132.51, 129.46 (t, <sup>3</sup>J<sub>PC</sub> = 5.2 Hz), 127.78 (m), 87.31 (dd, <sup>2</sup>J<sub>PC(trans)</sub> = 91.8 Hz, <sup>2</sup>J<sub>PC(cis)</sub> = 38.4 Hz), 84.70, 28.28 (t, <sup>1</sup>J<sub>PC</sub> = 21.5 Hz); <sup>31</sup>P{<sup>1</sup>H} NMR (CD<sub>2</sub>Cl<sub>2</sub>, 202 MHz): 49.09. NMR chemical shifts comparable to those in Reference 12. Single crystals for X-ray diffraction analysis were grown from slow vapor

diffusion of diethyl ether into dichloromethane. Elemental analysis (including 0.5 CH<sub>2</sub>Cl<sub>2</sub>) found (calculated for C<sub>30.5</sub>H<sub>45</sub>B<sub>20</sub>ClNiP<sub>2</sub>): C, 46.40 (46.73); H, 5.89 (5.79).

### **Pd(bc)(dppe) [3b].**

1,1'-Bis-(*o*-carborane) (0.100 g, 0.349 mmol) was added to a 10 mL Schlenk flask, which was then evacuated and backfilled with N<sub>2</sub> three times. Dry THF (4 mL) was transferred to the flask *via* cannula to give a clear solution. While stirring at room temperature, <sup>n</sup>BuLi (0.45 mL, 1.6 M, 0.72 mmol) was added dropwise *via* syringe, giving a dark yellow solution. The reaction mixture was then heated at 60°C for 3 hours, and the color slowly turned lighter yellow. After 3 hours, the flask was allowed to cool to room temperature yielding a golden-yellow solution. Pd(dppe)Cl<sub>2</sub> (0.202 g, 0.349 mmol) was added to a separate 25mL Schlenk flask, which was then evacuated and backfilled with N<sub>2</sub> three times. Dry THF (20 mL) was then transferred *via* cannula to give a white slurry. This flask was cooled to -78°C and stirred for 10 minutes. The dilithio-bis-carborane solution was added dropwise (~1 mL/min) to the cold Pd(dppe)Cl<sub>2</sub> slurry, and the reaction was allowed to warm up to room temperature and stir overnight, giving a deep orange mixture the following day. THF was removed *via* rotary evaporation after 20 hours, and the remaining orange solid was dissolved in 5-10 mL CH<sub>2</sub>Cl<sub>2</sub> and passed through a pad of Celite. After removal of solvent *in vacuo*, crude orange product (0.225 g) remained and was purified *via* column chromatography. A wide 60 mL filter frit was loaded halfway with silica in hexanes, and the crude product was dissolved in minimal 1:1 CH<sub>2</sub>Cl<sub>2</sub>:hexanes (R<sub>f</sub> = 0.50) and loaded on the silica. Any unreacted bis-carborane (R<sub>f</sub> = 0.90) can be removed as the initial clear/light yellow elution, and the desired product can be cleanly collected as the orange band that follows. The orange solution was concentrated to dryness to give an orange solid (0.70 g, 25%) that was dried under vacuum overnight. <sup>1</sup>H NMR (CD<sub>2</sub>Cl<sub>2</sub>, 500 MHz) δ 7.64 (t, 4H, Ar), 7.62 (t, 8H, Ar), 7.55 (t, 8H, Ar), 3.6-0.6 (br. m, 20H, BH), 2.12 (d, 4H, CH<sub>2</sub>, <sup>2</sup>J<sub>PH</sub> = 20.4 Hz); <sup>11</sup>B NMR (CD<sub>2</sub>Cl<sub>2</sub>, 160 MHz) -3.20 (m, 4B), -8.74 (m, 16B); <sup>13</sup>C NMR (CD<sub>2</sub>Cl<sub>2</sub>, 125 MHz) 134.57 (t, <sup>2</sup>J<sub>PC</sub> = 5.6 Hz), 132.74, 129.64 (t, <sup>3</sup>J<sub>PC</sub> = 5.4 Hz), 127.13, 91.90 (dd, <sup>2</sup>J<sub>PC(trans)</sub> = 138.7 Hz, <sup>2</sup>J<sub>PC(cis)</sub> = 14.7 Hz), 84.80, 28.82 (t, <sup>1</sup>J<sub>PC</sub> = 22.3 Hz); <sup>31</sup>P{<sup>1</sup>H} NMR (CD<sub>2</sub>Cl<sub>2</sub>, 202 MHz) 51.63. Single crystals for X-ray diffraction analysis were grown by cooling a concentrated solution of hot benzene to room temperature. Elemental analysis found (calculated for C<sub>30</sub>H<sub>44</sub>B<sub>20</sub>PdP<sub>2</sub>): C, 45.80 (45.65); H, 5.89 (5.62).

### Pt(bc)(dppe) [3c].

1,1'-Bis-(*o*-carborane) (0.100 g, 0.349 mmol) was added to a 10 mL Schlenk flask, which was then evacuated and backfilled with N<sub>2</sub> three times. Dry THF (4 mL) was transferred to the flask *via* cannula to give a clear solution. While stirring at room temperature, <sup>n</sup>BuLi (0.45 mL, 1.6 M, 0.72 mmol) was added drop-wise *via* syringe, giving a dark yellow solution. The reaction was then heated at 60°C for 3 hours, and the color slowly turned lighter yellow. After 3 hours, the flask was allowed to cool to room temperature yielding a golden-yellow solution. Pt(dppe)Cl<sub>2</sub> (0.234 g, 0.349 mmol) was added to a separate 25 mL Schlenk flask, which was then evacuated and backfilled with N<sub>2</sub> three times. Dry THF (15 mL) was then transferred *via* cannula to give a white slurry. This flask was cooled to -78°C and stirred for 10 minutes. The dilithio-bis-carborane solution was added dropwise (~1 mL/min) to the cold Pt(dppe)Cl<sub>2</sub> slurry, and the reaction was allowed to warm up to room temperature and stir overnight, giving a deep orange solution the following day. The orange solution was passed through a pad of Celite and washed with THF. The filtrate was then dried *via* rotary evaporation to yield a brown-orange solid. This solid was dissolved in 5-10 mL CH<sub>2</sub>Cl<sub>2</sub> and passed through a pad of Celite. After removal of solvent, crude orange product (0.225 g) remained and was purified *via* column chromatography through a pad of basic alumina. A wide 60 mL filter frit was loaded halfway with basic alumina in CH<sub>2</sub>Cl<sub>2</sub>, and the crude product was dissolved in minimal CH<sub>2</sub>Cl<sub>2</sub> (R<sub>f</sub> = 0.90) and loaded on the basic alumina. The orange filtrate (mix of product and unreacted bis-carborane) was collected, and the volume was reduced to about 1-2 mL *via* rotary evaporation. Next, 5-10 mL hexanes was added, causing a yellow solid to crash out. This solid was filtered and washed with hexanes (3 x 5 mL) and dried under vacuum for 24 hours to afford **3c** as a yellow powder (0.082 g, 27%). <sup>1</sup>H NMR (CD<sub>2</sub>Cl<sub>2</sub>, 500 MHz) δ 7.70 (m, 8H, Ar), 7.63 (t, 4H, Ar), 7.55 (m, 8H, Ar), 3.5-0.7 (br. m, 20H, BH), 2.07 (d, 4H, CH<sub>2</sub>, <sup>2</sup>J<sub>PH</sub> = 17.7 Hz); <sup>11</sup>B NMR (CD<sub>2</sub>Cl<sub>2</sub>, 160 MHz): -3.67 (m, 4B), -8.08 (m, 16B); <sup>13</sup>C NMR (CD<sub>2</sub>Cl<sub>2</sub>, 125 MHz) 134.75 (t, <sup>2</sup>J<sub>PC</sub> = 5.4 Hz), 132.69, 129.48 (t, <sup>3</sup>J<sub>PC</sub> = 5.5 Hz), 126.77 (m), 84.57, 89.12 (dd, bis-carborane C-Pt, <sup>2</sup>J<sub>PC(trans)</sub> = 128.4 Hz, <sup>2</sup>J<sub>PC(cis)</sub> = 8.34 Hz), 29.86 (m); <sup>31</sup>P{<sup>1</sup>H} NMR (CD<sub>2</sub>Cl<sub>2</sub>, 202 MHz): 41.44 (s, <sup>1</sup>J<sub>PtP</sub> = 2493 Hz). Single crystals for X-ray diffraction analysis were grown from slow vapor diffusion of diethyl ether into dichloromethane. Elemental analysis found (calculated for C<sub>30</sub>H<sub>44</sub>B<sub>20</sub>PtP<sub>2</sub>): C, 40.55 (41.04); H, 5.05 (4.80).

### Pt(bc)(dtb-bpy) [4a] and [4b].

**2** (0.080 g, 0.279 mmol) was charged to a 10mL Schlenk flask, which was then evacuated and backfilled 3 times with N<sub>2</sub>. Dry THF (3 mL) was added *via* cannula and the solution was stirred, followed by the addition of <sup>n</sup>BuLi (0.36 mL, 1.6 M, 0.576 mmol) at room temperature. The flask was heated at 60°C for 3 hours and then cooled to room temperature. Pt(dtb-bpy)Cl<sub>2</sub> (dtb-bpy = 4,4'-di-*tert*-butyl-2,2'-bipyridine, 0.149 g, 0.279 mmol) was charged to a separate 50mL Schlenk flask, which was evacuated and backfilled 3 times with N<sub>2</sub>. Next, dry THF (20 mL) was added, and the resulting yellow slurry was cooled to -78°C. The mixture of Li<sub>2</sub>[bc] was added dropwise to the cooled slurry. The reaction mixture was allowed to warm up to room temperature and was heated to 60°C. The reaction mixture slowly turned from bright yellow to dark brown/black. After 21 hours, the solvent was moved *via* rotary evaporation to yield a yellow-brown solid. This solid was washed with CH<sub>2</sub>Cl<sub>2</sub> (3 x 10 mL), yielding a gray solid (0.082 g) that was emissive under UV excitation ( $\lambda_{\text{exc}} = 365 \text{ nm}$ ). To this solid was added 5 mL hot 1,2-difluorobenzene, and this dark brown slurry was heated with a heat gun the solid completely dissolved. Next, the solution was passed through a pad of Celite, yielding a yellow-orange solution with black precipitate at the top of the Celite. This procedure was repeated two more times. The filtrate was dried *in vacuo*, and the pale orange solid was dried under vacuum overnight (0.055 g, 26%). <sup>1</sup>H NMR suggests a 1.0:1.4 mix of  $\kappa^2$ -B,C-bound (**4a**) and  $\kappa^2$ -C,C-bound (**4b**) isomers. Single crystals of **4a** for X-ray diffraction analysis were by cooling a concentrated solution of hot 2-MeTHF to room temperature. Attempts to reproduce this result led to products with various mixes of isomers, including both a majority  $\kappa^2$ -B,C-bound isomer and a majority  $\kappa^2$ -C,C-bound isomer, as evidenced by the <sup>1</sup>H NMR spectrum of the aryl region (See NMR spectra). HRMS (DART): *m/z* calculated for C<sub>22</sub>H<sub>44</sub>B<sub>20</sub>N<sub>2</sub>Pt [M+H]<sup>+</sup>, 748.5237 Da; found, 748.5246 Da.

**4a:** <sup>1</sup>H NMR (THF-d<sup>8</sup>, 500 MHz)  $\delta$  9.44 (d, 2H, Ar), 8.39 (d, 2H, Ar), 7.92 (dd, 2H, Ar), 3.1-1.0 (br m, 20H, BH), 1.44 (s, 18H, <sup>t</sup>Bu); <sup>13</sup>C NMR (THF-d<sup>8</sup>, 125 MHz) 166.32, 157.51, 151.77, 124.54, 121.02, 82.92, 81.01, 36.06, 30.13.

**4b:** <sup>1</sup>H NMR (THF-d<sup>8</sup>, 500 MHz)  $\delta$  9.83 (d, 1H, Ar), 9.27 (d, 1H, Ar), 8.41 (d, 1H, Ar), 8.37 (d, 1H, Ar), 7.97 (dd, 1H, Ar), 7.84 (dd, 1H, Ar), 4.47 (s, 1H, CH<sub>bis</sub>-carborane), 3.2-1.6 (br m, 20H, BH), 1.459 (9H, s, <sup>t</sup>Bu), 1.457 (9H, s, <sup>t</sup>Bu); <sup>13</sup>C NMR (THF-d<sup>8</sup>, 125 MHz) 165.44, 165.00, 157.99, 156.52,

154.24, 150.23, 125.15, 124.52, 121.12, 120.36, 85.17, 77.03, 70.52, 68.19, 36.53, 36.46, 30.27, 30.14.

Note:  $^{11}\text{B}$  NMR chemical shifts for 4a and 4b overlap, so values for the mixture are reported.  $^{11}\text{B}$  NMR (THF- $d^8$ , 160 MHz) -4.01 (4B), -8.79 (8B), -11.15 (8B).

### **Pt(tebc)(dtb-bpy) [8].**

7 (0.0689 g, 0.171 mmol, **tebc**) was charged to a 10mL Schlenk flask, which was then evacuated and backfilled 3 times with  $\text{N}_2$ . Dry THF (2 mL) was added *via* cannula and the solution was stirred, followed by the slow addition of  $^n\text{BuLi}$  (0.22 mL, 1.6 M, 0.351 mmol) at room temperature. The flask was heated at  $60^\circ\text{C}$  for 3 hours and then cooled to room temperature. Pt(dtb-bpy) $\text{Cl}_2$  (dtb-bpy = 4,4'-di-*tert*-butyl-2,2'-bipyridine, 0.0914 g, 0.171 mmol) was charged to a separate 25mL Schlenk flask, which was evacuated and backfilled 3 times with  $\text{N}_2$ . Next, dry THF (15 mL) was added, affording a yellow slurry, which was cooled to  $-78^\circ\text{C}$ . The mixture containing  $[\text{Li}_2(\text{tebc})]$  was added dropwise to the cooled slurry. The reaction mixture was allowed to warm up to room temperature and was then heated at  $60^\circ\text{C}$  for 60 hours. The reaction slowly turned from bright yellow to yellow-brown. After 60 hours, the solvent was moved *via* rotary evaporation to yield a yellow-brown solid. This solid was dissolved in diethyl ether and passed through a pad of Celite, and the filtrate was then dried *in vacuo*. Next, the resulting solid was washed with cold pentane (5 x 2 mL), yielding a pale orange solid. The solid was dissolved in  $\text{CH}_2\text{Cl}_2$  and passed through a silica plug. The filtrate was dried *in vacuo*, and the resulting solid was dried under vacuum overnight (0.063 g, 43%).  $^1\text{H}$  NMR ( $\text{CD}_2\text{Cl}_2$ , 500 MHz)  $\delta$  9.56 (d, 1H, Ar), 9.36 (d, 1H, Ar), 8.08 (d, 1H, Ar), 8.02 (d, 1H, Ar), 7.68 (dd, 1H, Ar), 7.47 (dd, 1H, Ar), 3.87 (s, 1H,  $\text{CH}_{\text{bis-carborane}}$ ), 3.3-1.2 (16H, br. m, BH), 1.45 (9H, s,  $^t\text{Bu}$ ), 1.43 (9H, s,  $^t\text{Bu}$ ), 1.02-0.82 (m, 12H,  $\text{CH}_2\text{CH}_3$ ), 0.56-0.79 (m, 8H,  $\text{CH}_2$ );  $^{11}\text{B}$  NMR ( $\text{CD}_2\text{Cl}_2$ , 160 MHz) 7.74 (m, 4B), -8.46 (s, 8B), -11.25 (s, 4B), -13.81 (s, 4B);  $^{13}\text{C}$  NMR ( $\text{CD}_2\text{Cl}_2$ , 125 MHz) 164.12 (s,  $\text{C}^2$  dtb-bpy,  $\text{C}-\text{Pt}_{\text{trans}}$ ), 163.58, 157.22, 155.85, 155.19, 149.79, 123.99, 123.77, 120.02, 119.17, 76.63, 73.20, 59.56, 55.39, 35.98, 35.90, 30.36, 30.23 (d, *tert*-butyl  $\text{CH}_3$ ,  $J = 16.2$  Hz), 13.95, 13.71, 13.57, 13.51, (ethyl  $\text{CH}_3$ ), 9.11 (br. m, ethyl  $\text{CH}_2$ ). Single crystals for X-ray diffraction analysis were grown the slow evaporation of diethyl ether over the course of one week. HRMS (Orbitrap):  $m/z$  calculated for  $\text{C}_{30}\text{H}_{64}\text{B}_{20}\text{N}_2\text{Pt}$  [M], 863.6724 Da; found, 863.0652 Da.

### [NEt<sub>4</sub>]<sub>2</sub>[Pd(bc)<sub>2</sub>]

**2** (0.100 g, 0.349 mmol) was added to a 25 mL Schlenk flask, which was then evacuated and backfilled with N<sub>2</sub> three times. Dry THF (4 mL) was transferred to the flask *via* cannula, generating a clear solution. While stirring at room temperature, <sup>n</sup>BuLi (0.45 mL, 1.6 M, 0.72 mmol) was added dropwise *via* syringe to give a dark yellow solution. The reaction was then heated to 60°C for 3 hours, and the color slowly turned lighter yellow. After 3 hours, the flask was cooled to room temperature, and under positive N<sub>2</sub> flow, PdCl<sub>2</sub> (0.0309 g, 0.175 mmol) was added. The temperature was increased to 60°C and the mixture was allowed to stir for 21 hours. The reaction was cooled to room temperature, passed through a pad of Celite, and the filtrate was dried *in vacuo*. The resulting brown solid was then dissolved in H<sub>2</sub>O (10 mL). To this solution was added a solution of tetraethylammonium bromide (NEt<sub>4</sub>Br, 0.0736 g, 0.349 mmol) dissolved in 2 mL H<sub>2</sub>O, and brown solid immediately precipitated. The solid was filtered and washed with H<sub>2</sub>O (3 x 10 mL) was then dissolved in CH<sub>2</sub>Cl<sub>2</sub> and dried over Na<sub>2</sub>SO<sub>4</sub>. The mixture was filtered and the solvent removed *via* rotary evaporation. Next, the solid was dissolved in minimal CH<sub>2</sub>Cl<sub>2</sub> and loaded on silica. The plug was flushed with CH<sub>2</sub>Cl<sub>2</sub> (100 mL) to remove side products, and then flushed with acetone (50 mL) to collect the product. Solvent was removed *via* rotary evaporation, and the brown solid was vacuum dried (0.059 g, 25%). *Note: We believe B—H activation and/or deboronation may be occurring under the given reaction conditions for [NEt<sub>4</sub>]<sub>2</sub>[Pd(bc)<sub>2</sub>]; however, the <sup>11</sup>B NMR spectrum for [NEt<sub>4</sub>]<sub>2</sub>[Pd(bc)<sub>2</sub>] isolated under these conditions are in agreement with the <sup>11</sup>B NMR spectrum for the side product isolated during the synthesis of **3b** (see Figure S7 below).* <sup>1</sup>H NMR (CD<sub>2</sub>Cl<sub>2</sub>, 500 MHz) δ 3.4-1.0 (br. m, 20H, BH), 3.21 (q, 16H, CH<sub>2</sub>), 1.35 (tt, 24H, CH<sub>3</sub>); <sup>11</sup>B NMR (CD<sub>2</sub>Cl<sub>2</sub>, 160 MHz) -2.66 (m, 9B), -9.31 (m, 26B), -16.75 (2B), -22.07 (2B), -32.64 (0.5B), -35.11 (0.5B); <sup>13</sup>C NMR (CD<sub>2</sub>Cl<sub>2</sub>, 125 MHz) 125.77, 82.77, 82.39, 72.30, 65.49, 65.22, 63.25, 34.46, 30.44, 30.05, 7.87. Elemental analysis found (calculated for C<sub>24</sub>H<sub>80</sub>B<sub>40</sub>N<sub>2</sub>Pd): C, 32.68 (30.81); H, 8.58 (8.62).

### [NEt<sub>4</sub>]<sub>2</sub>[Pt(bc)<sub>2</sub>]

**2** (0.100 g, 0.349 mmol) was added to a 25 mL Schlenk flask, which was then evacuated and backfilled with N<sub>2</sub> three times. Dry THF (4 mL) was transferred to the flask *via* cannula, generating a clear solution. While stirring at room temperature, <sup>n</sup>BuLi (0.45 mL, 1.6 M, 0.72

mmol) was added dropwise *via* syringe to give a dark yellow solution. The reaction mixture was then heated at 60°C for 3 hours, and the color slowly turned lighter yellow. After 3 hours, the flask was cooled to -78°C, and under positive N<sub>2</sub> flow, Pt(cod)Cl<sub>2</sub> (cod = 1,5-cyclooctadiene, 0.065 g, 0.175 mmol) was added. The temperature was increased to 60°C and the resulting mixture was allowed to stir for 21 hours. The resulting dark brown mixture was allowed to cool to room temperature and was passed through a pad of Celite. The filtrate was dried *in vacuo*. The resulting solid was then dissolved in H<sub>2</sub>O (10 mL). To this solution was added a solution of tetraethylammonium bromide (NEt<sub>4</sub>Br, 0.0736 g, 0.349 mmol) dissolved in 2 mL H<sub>2</sub>O, and dark green solid immediately precipitated. The solid was filtered and washed with H<sub>2</sub>O (3 x 10 mL) and was then dissolved in CH<sub>2</sub>Cl<sub>2</sub> and dried over Na<sub>2</sub>SO<sub>4</sub>. The dark brown solution was filtered and the solvent removed *via* rotary evaporation. Next, the solid was dissolved in minimal CH<sub>2</sub>Cl<sub>2</sub> and loaded on silica. The plug was flushed with CH<sub>2</sub>Cl<sub>2</sub> (100 mL) to remove side products, and then flushed with acetone (50 mL) to collect the product. Solvent was removed *via* rotary evaporation, and the resulting brown solid was vacuum dried (0.182 g, 68%). *Note: We believe B—H activation and/or deboronation may be occurring under the given reaction conditions for [NEt<sub>4</sub>]<sub>2</sub>[Pt(bc)<sub>2</sub>]; however, the <sup>11</sup>B NMR spectrum for [NEt<sub>4</sub>]<sub>2</sub>[Pt(bc)<sub>2</sub>] isolated under these conditions are in agreement with the <sup>11</sup>B NMR spectrum for the side product isolated during the synthesis of **3c** (see Figure S7 below).* <sup>1</sup>H NMR (CD<sub>2</sub>Cl<sub>2</sub>, 500 MHz): 3.3-1.0 (br. m, 20H, BH), 3.21 (q, 16H, CH<sub>2</sub>), 1.35 (tt, 24H, CH<sub>3</sub>); <sup>11</sup>B NMR (CD<sub>2</sub>Cl<sub>2</sub>, 160 MHz) -2.84 (m, 8B), -9.45 (m, 25H), -16.94 (d, 4B), -22.25 (d, 2B), -32.77 (d, 0.5B), -35.21 (d, 0.5B); <sup>13</sup>C NMR (CD<sub>2</sub>Cl<sub>2</sub>, 125 MHz) 72.31, 71.22, 65.43, 63.26, 29.88, 22.72, 14.21, 7.86. Elemental analysis found (calculated for C<sub>24</sub>H<sub>80</sub>B<sub>40</sub>N<sub>2</sub>Pt): C, 31.37 (28.14); H, 7.56 (7.87).

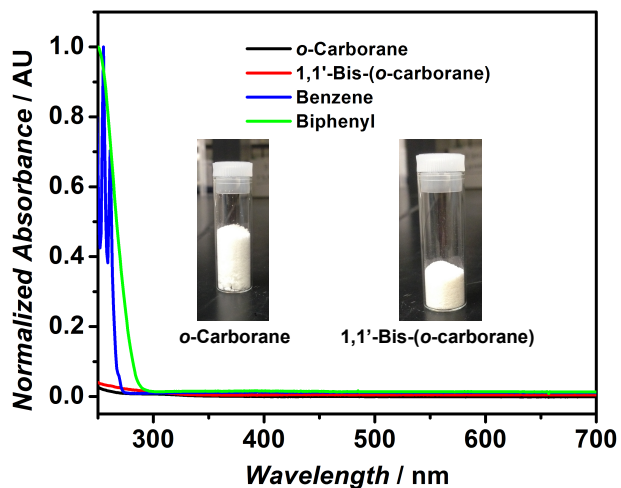

**Figure S1:** UV-Vis absorption spectrum of **1** and **2**. Solutions were made to 0.002 M concentration.

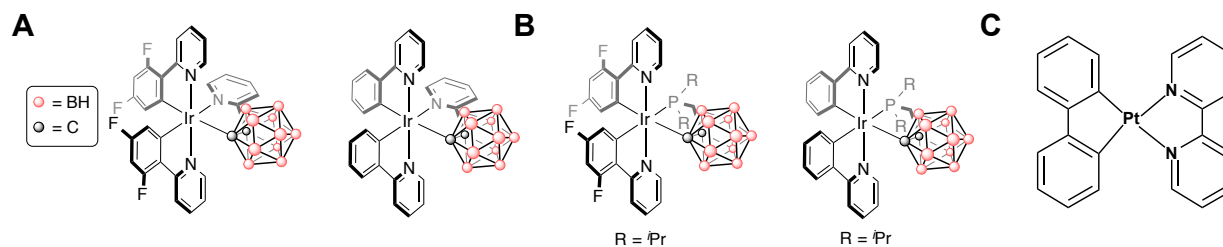

**Figure S2:** Structures of luminescent compounds mentioned in manuscript. A) Ir(III) compounds containing a  $\kappa^2$ -C,N-bound 1-(2-pyridyl)-*o*-carboranyl ligand (page 1 of manuscript, reference 13, SI); B) Ir(III) compounds containing a  $\kappa^2$ -C,P-bound 1-( $i$ Pr<sub>2</sub>PCH<sub>2</sub>)-*o*-carboranyl (page 1 of manuscript, reference 14, SI); C) Pt(bph)(bpy) where bph = biphenyl and bpy = 2,2'-bipyridine (page 2 of manuscript, reference 15, SI).



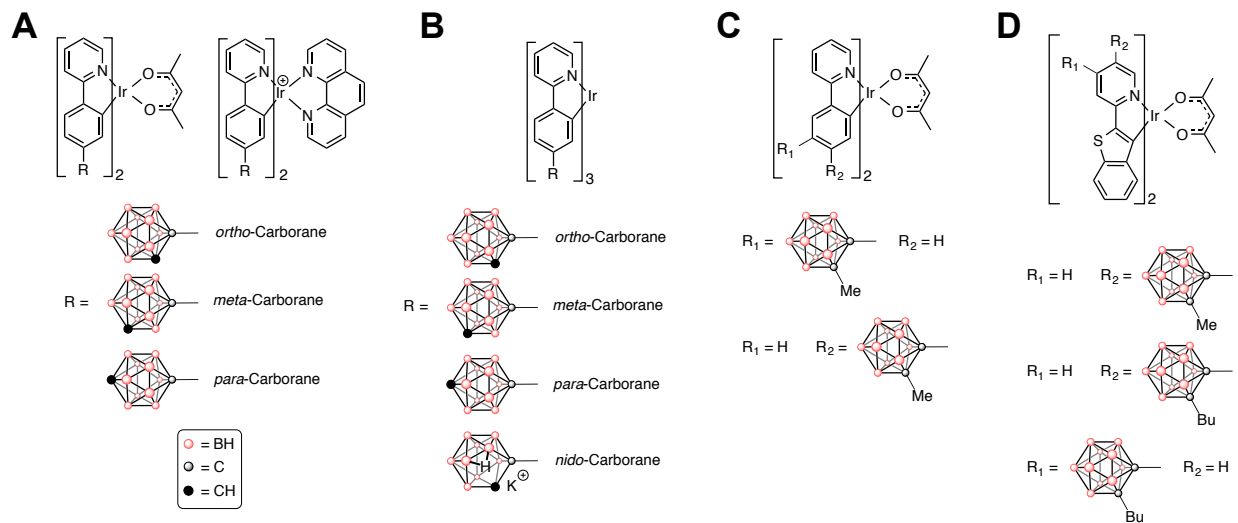

**Figure S3:** Structures of Ir(III) compounds that contain *ortho*-, *meta*-, *para*-, and *nido*-carborane as substituents. A) Reference 16; B) Reference 17; C) Reference 18; D) Reference 19.

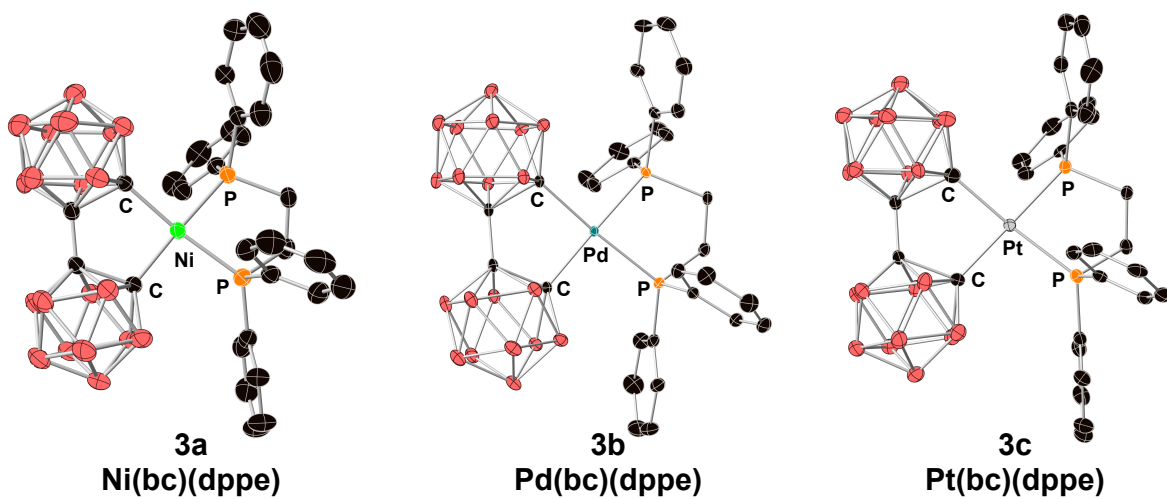

**Figure S4:** Thermal ellipsoid plots of **3a-3c** at 50% probability.

**Table S1:** Selected bond distances and angles for **3a-3c**.

| Parameter                       | <b>3a</b> | <b>3b</b> | <b>3c</b> |
|---------------------------------|-----------|-----------|-----------|
| M-C1 (Å)                        | 2.007     | 2.097     | 2.090     |
| M-C4 (Å)                        | 1.995     | 2.103     | 2.093     |
| C1-C2 (Å)                       | 1.694     | 1.688     | 1.744     |
| C2-C3 (Å)                       | 1.514     | 1.531     | 1.514     |
| C3-C4 (Å)                       | 1.694     | 1.690     | 1.728     |
| M-P1 (Å)                        | 2.253     | 2.312     | 2.297     |
| M-P2 (Å)                        | 2.243     | 2.304     | 2.310     |
| C1-M-C4 (°)                     | 90.82     | 88.20     | 86.88     |
| M-C1-C2 (°)                     | 111.25    | 111.60    | 113.48    |
| C1-C2-C3 (°)                    | 113.04    | 114.43    | 112.52    |
| C2-C3-C4 (°)                    | 113.40    | 114.18    | 113.69    |
| C3-C4-M (°)                     | 111.43    | 111.51    | 113.36    |
| C1-M-P2 (°)                     | 171.46    | 174.30    | 173.20    |
| C4-M-P1 (°)                     | 172.40    | 174.71    | 173.05    |
| M-M (Å)                         | 10.976    | 12.176    | 8.685     |
| C1-C4 (Å)                       | 2.850     | 2.923     | 2.876     |
| C1-C2-C3-C4 dihedral            | -0.2      | -2.91     | 0.59      |
| C1-C2-C3-C4-M sum of angles (°) | 539.94    | 539.92    | 539.93    |

**Table S2:** Selected bond distances and angles for **3a-3c** and the average bond distances and angles of corresponding M(bph)(P<sup>^</sup>P) complexes.

| Parameter   | <b>3a</b> | Avg. Ni(bph)(P <sup>^</sup> P) | <b>3b</b> | Avg. Pd(bph)(P <sup>^</sup> P) | <b>3c</b> | Avg. Pt(bph)(P <sup>^</sup> P) |
|-------------|-----------|--------------------------------|-----------|--------------------------------|-----------|--------------------------------|
| M-C1 (Å)    | 2.007     | 1.960                          | 2.097     | 2.050                          | 2.090     | 2.050                          |
| M-C4 (Å)    | 1.995     | 1.940                          | 2.103     | 2.050                          | 2.093     | 2.030                          |
| C1-M-C4 (°) | 90.82     | 83.25                          | 88.20     | 80.82                          | 86.88     | 80.66                          |

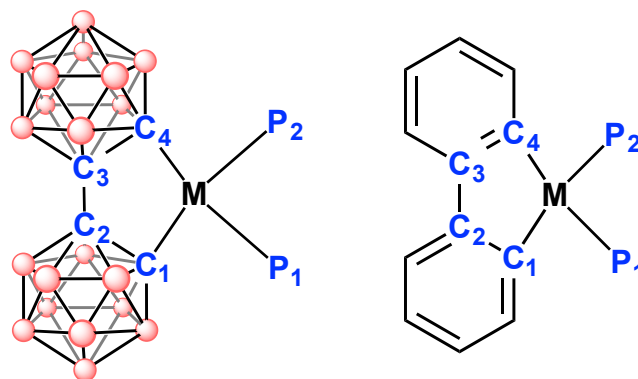

**M: Ni, Pd, Pt**

**Figure S5:** Numbering scheme for values presented in Table S1 and Table S2. Left: M = Ni, **3a**; M = Pd, **3b**; M = Pt, **3c**. Right: M(bph)(P<sup>^</sup>P), where M = Ni, Pd, Pt and (P<sup>^</sup>P) = chelated diphosphine ligand.

To demonstrate that the bc framework is structurally similar to the biphenyl (bph) framework, we compared bond distances, angles, and molecular geometries of M(bc)(dppf) to those of a series of cyclometallated M(bph)(P<sup>^</sup>P) in reported X-ray crystal structures.<sup>[20]</sup> X-ray quality crystals of **3a-3c** were grown using slow evaporation of diethyl ether, vapor diffusion of diethyl ether into dichloromethane, or cooling of a concentrated solution of hot benzene. For **3a-3c**, the M—C bond is about 0.05 Å longer than the average M—C bond in corresponding biphenyl complexes. Of the three complexes **3a-3c**, the Ni—C bond (**3a**) is the shortest M—C bond at 2.00 Å, and both Pd—C (**3b**) and Pt—C (**3c**) bond lengths are about 2.09 Å. These observations are consistent with Ni possessing the smallest atomic radius and Pd and Pt exhibit similar atomic radii due to the lanthanide contraction for Pt.<sup>[21]</sup>

The C1—M—C4 bond angles decrease as the size of the metal atom increases, which compares well with analogous Group 10 bph complexes. However, the trend is more pronounced in the bc series with this angle being 6-8° larger than the average C1—M—C4 angle in the biphenyl complexes. The C1—C2—C3—C4 dihedral angles of 0.20°, 2.91°, and 0.59° for **3a**, **3b**, and **3c**, respectively, suggest the chelation of **2** leads to a minimally distorted square planar structure. The C1—C4 distances between the two metal-bound carbons fall within a range of 0.07 Å of each other (2.850 Å to 2.923 Å), indicating the larger C1—M—C4 angle is likely a structural characteristic of **2**. For comparison, the average corresponding C1—C4 distance in M(bph)(P<sup>^</sup>P) complexes is about 0.2 Å shorter at 2.662 Å, further rationalizing the more acute C1—M—C4 angles seen in those bph complexes. Furthermore, the bc C1—M—C4 bond angles

are larger than all reported C1—M—C4 bond angles for M(bph)(P<sup>^</sup>P) complexes. Compounds **3a-3c** have C—M—P<sub>trans</sub> angles of 171-174°, making them slightly distorted square planar complexes. These values are comparable to those of the reported cyclometallated M(bph)(P<sup>^</sup>P) compounds, indicating that **bc** does not influence the intramolecular geometry much differently than biphenyl.

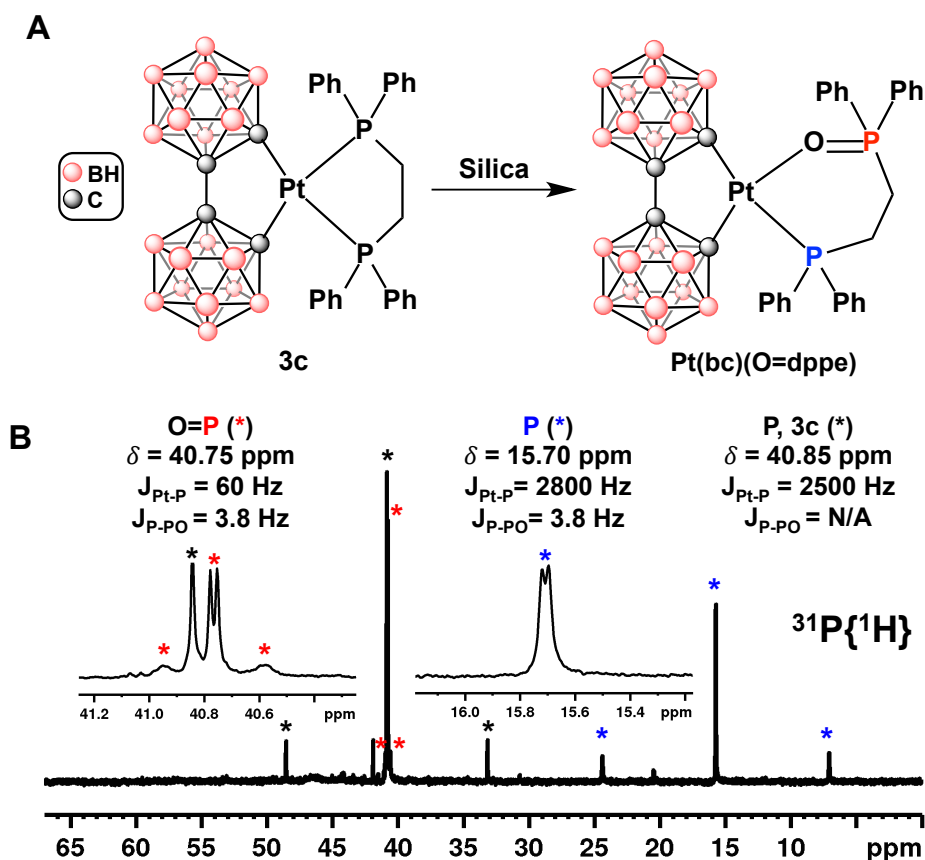

**Figure S6:** A) Reaction scheme for the oxidation of **3c** on silica to form **Pt(bc)(O=dppe)**. B)  $^{31}\text{P}\{^1\text{H}\}$  NMR spectrum of the product **Pt(bc)(O=dppe)** isolated after passing **3c** through a short plug of silica eluted with  $\text{CH}_2\text{Cl}_2$ . Insets show expanded regions of the  $^{31}\text{P}$  NMR spectrum corresponding to each of the phosphorous atoms in the dppe ligand. Asterisks correspond to the  $^{31}\text{P}$  peak and Pt—P satellites for each phosphorous: black = both P atoms in **3c**; red = O=P in **Pt(bc)(O=dppe)**; blue = P in **Pt(bc)(O=dppe)**.

The purification of **3c** proved troublesome as one of the P—Pt bonds easily underwent oxidation on silica, forming the monooxidized dppe species as evidenced by the formation of 2 doublets with unique  $^1J_{\text{Pt-P}}$  values in the  $^{31}\text{P}\{^1\text{H}\}$  NMR spectrum. For the oxidized P (O=P, red in Figure 3A),  $\delta = 40.75$  ppm with  $^2J_{\text{Pt-P}} = 60$  Hz and  $^3J_{\text{P-PO}} = 3.8$  Hz. For the unoxidized P (P, blue in Figure 3A),  $\delta = 15.70$  ppm with  $^1J_{\text{Pt-P}} = 2800$  Hz and  $^3J_{\text{P-PO}} = 3.8$  Hz. These chemical shifts and coupling constants are similar to those for compounds **2a** and **2b** in Reference 22. Purifying the crude reaction mixture for **3c** *via* column chromatography with basic alumina yielded the unoxidized, isolated compound at 27% yield.

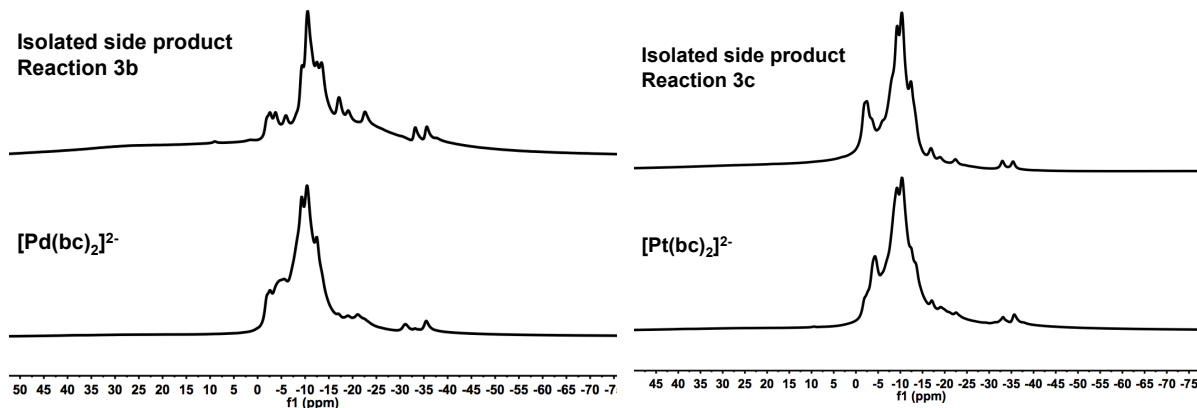

**Figure S7:** Left: Stacked  $^{11}\text{B}\{^1\text{H}\}$  NMR spectra for the  $[\text{Pd}(\text{bc})_2]^{2-}$  side product isolated during the synthesis of **3b** (top) and independently synthesized  $[\text{Pd}(\text{bc})_2]^{2-}$  (see experimental). Right: Stacked  $^{11}\text{B}\{^1\text{H}\}$  NMR spectra for the  $[\text{Pt}(\text{bc})_2]^{2-}$  side product isolated during the synthesis of **3c** (top) and independently synthesized  $[\text{Pt}(\text{bc})_2]^{2-}$  (see experimental).

For each reaction, the other major by-product is  $[\text{M}(\text{bc})_2]^{2-}$  (where  $\text{M} = \text{Ni}, \text{Pd}, \text{Pt}$ ), which is isolated *via* silica column chromatography. The formation of this di-substituted complex is likely due to the low concentration of  $\text{M}(\text{dppe})\text{Cl}_2$  relative to newly generated and more soluble  $\text{M}(\text{bc})(\text{dppe})$  under the reaction conditions, making  $\text{M}(\text{bc})(\text{dppe})$  more prone to a second nucleophilic attack from the  $\text{Li}_2\text{-[bc]}$ . The  $^{11}\text{B}$  NMR of the isolated reaction product for **3b** and **3c** matched the  $^{11}\text{B}$  NMR of the independently synthesized  $[\text{Pd}(\text{bc})_2]^{2-}$  and  $[\text{Pt}(\text{bc})_2]^{2-}$  complexes (Figure S5), supporting our hypothesis.

We believe B—H activation and/or deboronation may be occurring under the given reaction conditions for  $[\text{Pd}(\text{bc})_2]^{2-}$  and  $[\text{Pt}(\text{bc})_2]^{2-}$ , and that the reaction product contains admixtures of *closo-nido-[bc]* and/or its metalation products. Kazakov and coworkers have reported the partial deboronation of **2** in the presence of water,<sup>[23]</sup> and their reported  $^{11}\text{B}$  NMR chemical shifts are similar to those observed in for  $[\text{Pd}(\text{bc})_2]^{2-}$  and  $[\text{Pt}(\text{bc})_2]^{2-}$  (Figure S7). However, the  $^{11}\text{B}$  NMR spectra for  $[\text{Pd}(\text{bc})_2]^{2-}$  and  $[\text{Pt}(\text{bc})_2]^{2-}$  isolated under these conditions are in agreement with the  $^{11}\text{B}$  NMR spectra for the side product isolated during the synthesis of **3b** and **3c**.

Additionally,  $^{31}\text{P}$  NMR shows the *in-situ* formation of mono-oxidized dppe,  $\text{Ph}_2\text{P}(\text{CH}_2)_2\text{P}(\text{O})\text{Ph}_2$  (**O=dppe**) for the synthesis of **3a-3c**, suggesting the ligand is displaced by an extra equivalent of  $\text{Li}_2\text{-[bc]}$  as the metal center is substituted twice (Figure S6). The  $^{31}\text{P}\{^1\text{H}\}$  chemical shifts for **O=dppe** are similar to those for compound **2** in Reference 24. Interestingly, we still observe free **O=dppe** despite stringent air-free conditions.

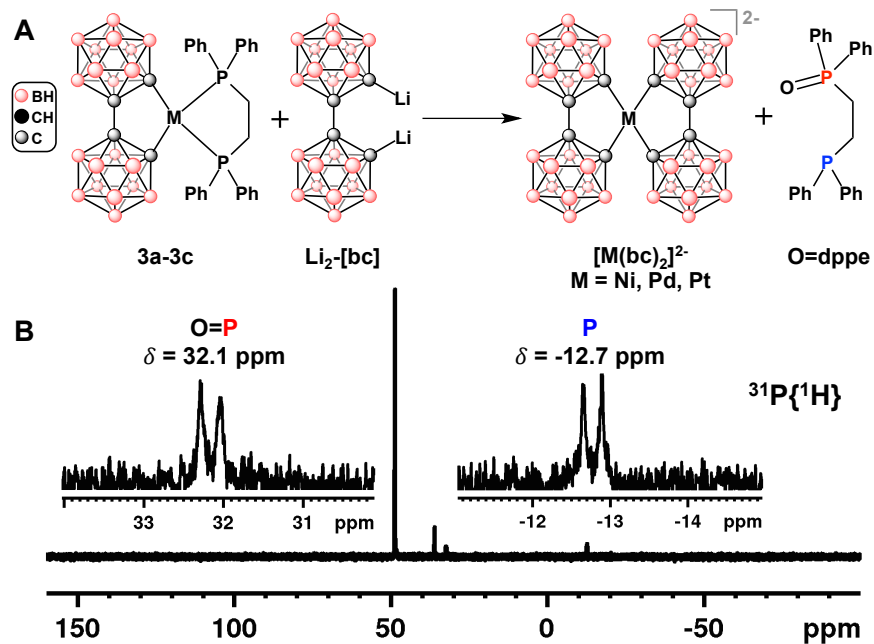

**Figure S8:** A) Reaction scheme for the formation of  $[\text{M}(\text{bc})_2]^{2-}$  (M = Ni, Pd, Pt) and **O=dppe**. B) Representative *in-situ*  $^{31}\text{P}\{^1\text{H}\}$  NMR spectrum during the synthesis of **3a** shows the formation of free **O=dppe** ( $\delta = 32.1$  ppm, O=P;  $\delta = -12.7$  ppm, P), which results from the reaction of  $\text{Li}_2\text{-(bc)}$  with **3a** ( $\delta = 49.09$  ppm) to form  $[\text{Ni}(\text{bc})_2]^{2-}$ . Interestingly, **O=dppe** formed even under rigorous oxygen-free conditions.

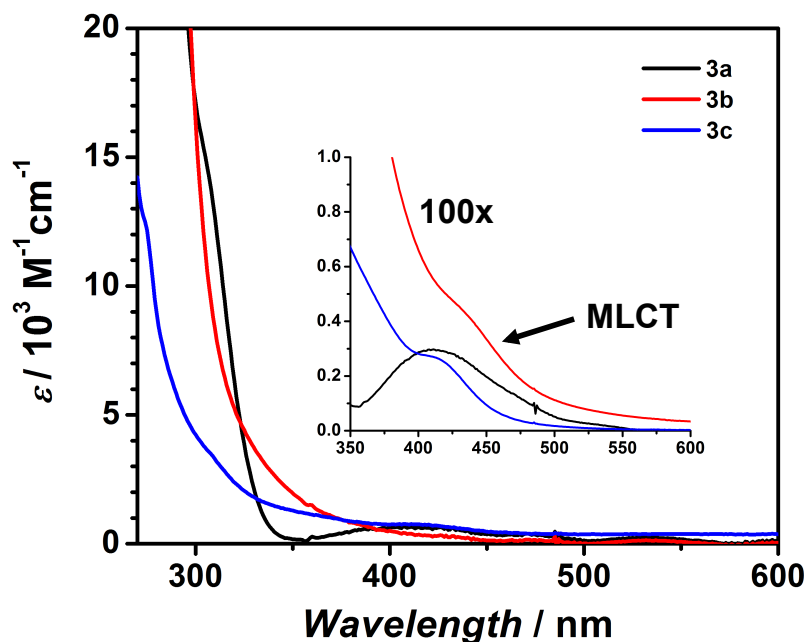

**Figure S9:** UV-Vis absorption spectrum for **3a** (black), **3b** (red), and **3c** (blue). Inset: Zoomed in region depicting MLCT transitions.

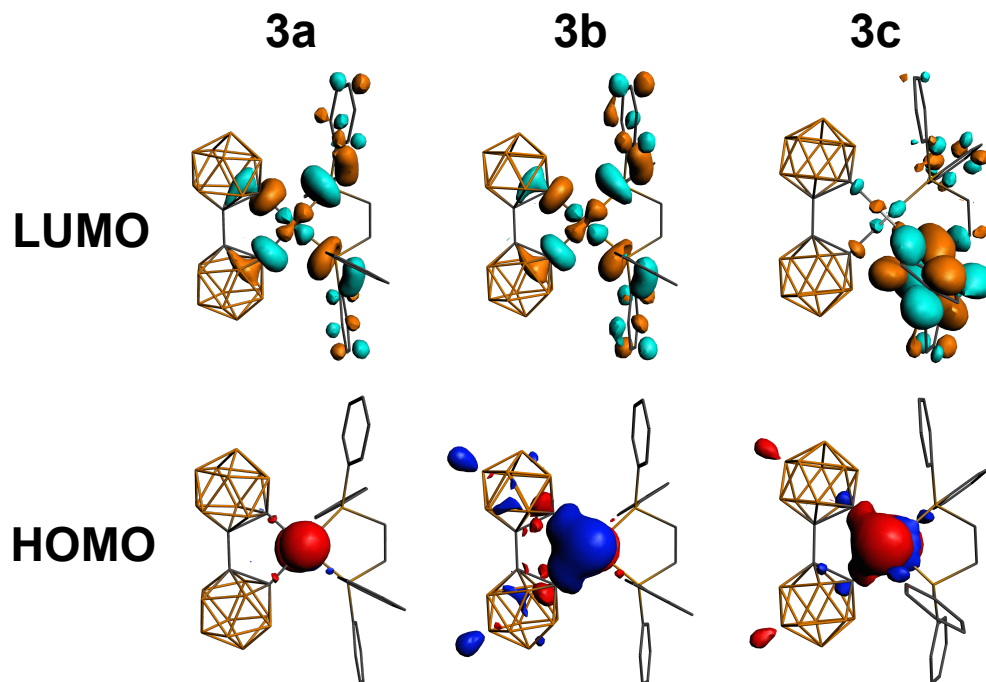

**Figure S10:** HOMO and LUMO images derived from DFT calculations of **3a** (left), **3b** (middle), and **3c** (right). Involvement of the **bc** ligand in HOMO-LUMO transitions is negligible, indicating the **bc** ligand is photophysically innocent.

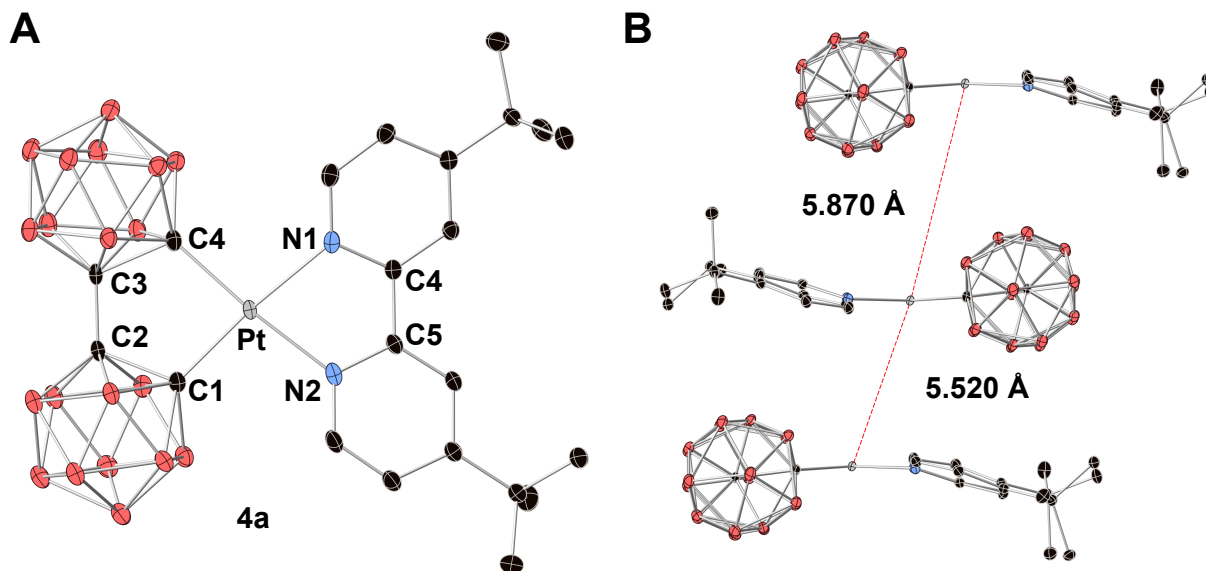

**Figure S11:** A) Thermal ellipsoid plot of **4a** (50% probability). H atoms were omitted for clarity. B) Stacking of **4a** Pt(II)···Pt(II) distances of 5.870 Å and 5.520 Å.



**Table S3:** Selected bond distances and angles for **4a**.

| Parameter                | <b>4a</b> |
|--------------------------|-----------|
| Pt-C1 (Å)                | 2.043     |
| Pt-C4 (Å)                | 2.045     |
| C1-C2 (Å)                | 1.708     |
| C2-C3 (Å)                | 1.516     |
| C3-C4 (Å)                | 1.71      |
| Pt-N1 (Å)                | 2.109     |
| Pt-N2 (Å)                | 2.105     |
| C1-Pt-C4 (°)             | 86.54     |
| Pt-C1-C2 (°)             | 114.67    |
| C1-C2-C3 (°)             | 112.04    |
| C2-C3-C4 (°)             | 112.15    |
| C3-C4-Pt (°)             | 114.43    |
| C1-Pt-N1 (°)             | 174.27    |
| C4-Pt-N2 (°)             | 173.08    |
| Pt...Pt (Å)              | 5.87      |
| C1-C4 (Å)                | 2.802     |
| C1-C2-C3-C4 dihedral (°) | 1.22      |
| N1-C4-C5-N2 dihedral (°) | 1.27      |

**Table S4:** Selected bond distances and angles for **4a** and the selected average bond distances and angles of Pt(bph)(N<sup>^</sup>N) complexes.

| Parameter    | <b>4a</b> | Pt(bph)(N <sup>^</sup> N) |
|--------------|-----------|---------------------------|
| Pt-C1 (Å)    | 2.043     | 2.011                     |
| Pt-C4 (Å)    | 2.045     | 1.996                     |
| Pt-N1 (Å)    | 2.091     | 2.106                     |
| Pt-N2 (Å)    | 2.105     | 2.126                     |
| C1-Pt-C4 (°) | 86.54     | 80.76                     |
| C1-Pt-N1 (°) | 174.27    | 151.44                    |
| C4-Pt-N2 (°) | 173.08    | 151.33                    |

For **4a**, both Pt—C bond lengths are almost identical at 2.043 Å and 2.045 Å, and they are only 0.04 Å longer than the average Pt—C bond found in all Pt(bph)(N<sup>^</sup>N) crystal structures available in the Cambridge Structural Database. At 2.105 Å and 2.091 Å, Pt—N bonds in this

molecule are roughly the same as the average Pt—N bond in Pt(bph)(N<sup>^</sup>N) compounds, with the difference in length of about 0.02-0.03 Å. The C—Pt—C angle in the **bc** analogue is about 6° larger than the average corresponding angle in all N<sup>^</sup>N chelated biphenyl analogues (86.54° versus 80.76°), which is characteristic of **bc**-chelated metal ions reported. This C—M—C angle for **4a** is also consistent with the C—M—C angle seen in **3a-3c** (Table S2). Based on this evidence, the intramolecular geometry of the synthesized **bc** complex is roughly equivalent to that of its biphenyl analogues.

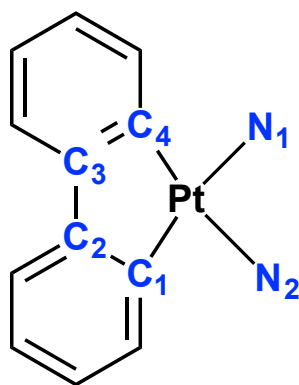

**Figure S12:** Numbering scheme for Pt(bph)(N<sup>^</sup>N) complexes listed in Table S3 and Table S4.

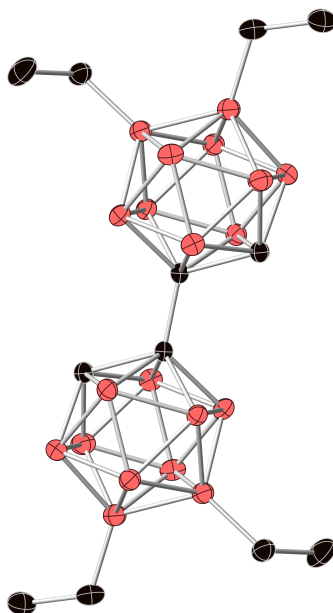

**Figure S13:** Thermal ellipsoid plot of **7** (50% probability). Salmon = B; black = C. H atoms were omitted for clarity.

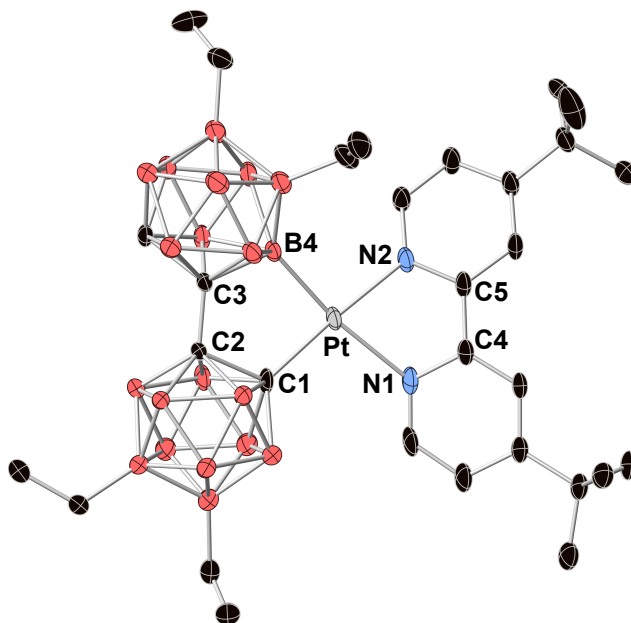

**Figure S14:** Thermal ellipsoid plot of **8** (50% probability). H atoms were omitted for clarity. Labels indicate the numbering scheme used for Table S5.

**Table S5:** Selected bond angles and distances for **8**.

| Parameter                | <b>8</b> |
|--------------------------|----------|
| Pt-C1 (Å)                | 2.036    |
| Pt-B4 (Å)                | 2.073    |
| C1-C2 (Å)                | 1.704    |
| C2-C3 (Å)                | 1.517    |
| C3-B4 (Å)                | 1.725    |
| Pt-N1 (Å)                | 2.175    |
| Pt-N2 (Å)                | 2.053    |
| C1-Pt-B4 (°)             | 87.02    |
| Pt-C1-C2 (°)             | 115.78   |
| C1-C2-C3 (°)             | 110.73   |
| C2-C3-B4 (°)             | 114.11   |
| C3-B4-Pt (°)             | 112.04   |
| C1-Pt-N2 (°)             | 176.55   |
| B4-Pt-N1 (°)             | 168.82   |
| Pt...Pt (Å)              | 7.979    |
| C1-B4 (Å)                | 2.829    |
| C1-C2-C3-B4 dihedral (°) | 6.1      |
| N1-C4-C5-N2 dihedral (°) | 4.43     |

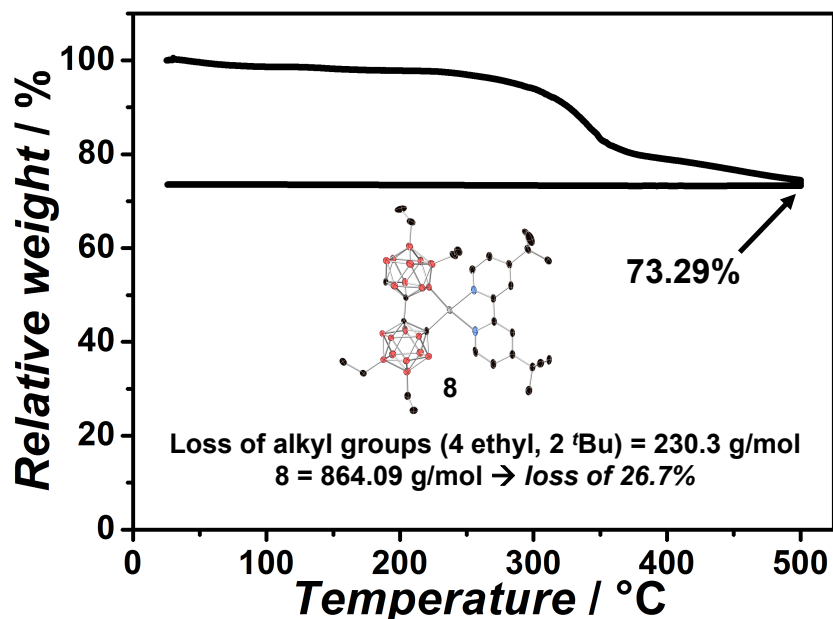

**Figure S15:** Thermogravimetric analysis (TGA) of compound **8** up to 500°C. The **bc** framework remains intact, and the loss in mass corresponds to the cleavage of alkyl groups from both ligands.

### Geometry Optimized Coordinates for DFT Calculations.

#### Ni(bc)(dppe) [3a].

| Atom | X           | Y           | Z          |
|------|-------------|-------------|------------|
| Ni   | 0.68130784  | 7.86224652  | 3.24437611 |
| P    | -1.26868014 | 6.72001114  | 3.49170712 |
| P    | -0.35978197 | 8.8625613   | 1.48195488 |
| B    | 2.994782    | 9.96752888  | 1.84304495 |
| H    | 2.15585703  | 10.70107025 | 1.43005302 |
| B    | 3.23819456  | 8.35001487  | 1.20090549 |
| H    | 2.57821322  | 7.90811987  | 0.32079833 |
| B    | 4.91677016  | 7.86346719  | 1.51662324 |
| H    | 5.47736619  | 7.09155985  | 0.80188353 |
| B    | 5.72325876  | 9.20504807  | 2.36574499 |
| H    | 6.89104651  | 9.4186741   | 2.25652971 |
| B    | 4.52873294  | 10.51587323 | 2.56025468 |
| H    | 4.80735364  | 11.67367185 | 2.6067092  |
| B    | 3.60506102  | 7.28269331  | 2.53582347 |
| H    | 3.21624832  | 6.17007578  | 2.57232808 |
| B    | 5.14459512  | 7.79364483  | 3.28269304 |

|   |             |             |            |
|---|-------------|-------------|------------|
| H | 5.78629056  | 6.99009515  | 3.87502496 |
| B | 4.90873847  | 9.4372323   | 3.92810226 |
| H | 5.38900024  | 9.76040877  | 4.96402319 |
| B | 3.22580874  | 9.91603121  | 3.57803344 |
| H | 2.60670085  | 10.57563694 | 4.33280972 |
| B | 4.54729128  | 9.54722488  | 1.06994424 |
| H | 4.85107648  | 10.00636013 | 0.01242494 |
| B | 2.60772569  | 6.03541539  | 5.17769788 |
| H | 2.89773382  | 5.35984693  | 4.25706749 |
| B | 3.84885902  | 6.65963133  | 6.29942675 |
| H | 4.98880656  | 6.41497752  | 6.07806891 |
| B | 3.34270067  | 8.28910086  | 6.8096799  |
| H | 4.13515     | 9.16323281  | 6.93920908 |
| B | 1.79192645  | 8.64829172  | 5.99882394 |
| H | 1.50448676  | 9.72803552  | 5.62248972 |
| B | 1.08329627  | 5.89959664  | 6.02883733 |
| H | 0.3122927   | 5.08756852  | 5.63067479 |
| B | 0.5869789   | 7.50365337  | 6.54357491 |
| H | -0.54352648 | 7.85927784  | 6.52479365 |
| B | 1.79673804  | 8.1336022   | 7.682261   |
| H | 1.4943848   | 8.91833046  | 8.52716949 |
| B | 3.06178246  | 6.89127174  | 7.87581888 |
| H | 3.68343158  | 6.764142    | 8.88497246 |
| B | 2.61071988  | 5.5001382   | 6.85356997 |
| H | 2.90324816  | 4.37040944  | 7.09598034 |
| B | 1.35053747  | 6.40831532  | 7.7173315  |
| H | 0.71775639  | 5.93315735  | 8.60900253 |
| C | -1.91952823 | 7.91177759  | 1.08800196 |
| H | -2.58281384 | 8.52963135  | 0.46663606 |
| H | -1.62387702 | 7.03743491  | 0.49123538 |
| C | -2.5705466  | 7.48548301  | 2.38974153 |
| H | -3.38946478 | 6.76892979  | 2.23778317 |
| H | -2.98066464 | 8.35282125  | 2.92527119 |
| C | -1.0474131  | 5.05443258  | 2.73237353 |
| C | 0.24288978  | 4.63942213  | 2.36840491 |
| H | 1.09707882  | 5.28630376  | 2.58010927 |
| C | 0.43949325  | 3.40309725  | 1.74601711 |
| H | 1.4484258   | 3.09148819  | 1.47218807 |
| C | -0.65088629 | 2.57185862  | 1.48147561 |
| H | -0.49763654 | 1.60539699  | 0.99872821 |
| C | -1.94167344 | 2.97750644  | 1.84029941 |
| H | -2.795531   | 2.32848128  | 1.63963107 |
| C | -2.1411169  | 4.21143655  | 2.46129865 |

|   |             |             |             |
|---|-------------|-------------|-------------|
| H | -3.15141682 | 4.50912923  | 2.7478294   |
| C | -2.29594903 | 6.45549847  | 5.0041215   |
| C | -2.9761234  | 7.55956098  | 5.54956077  |
| H | -2.85121997 | 8.55445379  | 5.11901217  |
| C | -3.79819518 | 7.40497557  | 6.66549029  |
| H | -4.31677757 | 8.27138693  | 7.07805176  |
| C | -3.94312428 | 6.14780841  | 7.26001555  |
| H | -4.58120248 | 6.02752767  | 8.13671425  |
| C | -3.25883008 | 5.0500927   | 6.7342386   |
| H | -3.35722195 | 4.06842137  | 7.19976275  |
| C | -2.43748049 | 5.20047844  | 5.61354259  |
| H | -1.90696793 | 4.3356255   | 5.21768429  |
| C | 0.21883843  | 9.1871958   | -0.24334024 |
| C | 0.47520604  | 10.48188264 | -0.71773625 |
| H | 0.37231565  | 11.33895554 | -0.0535171  |
| C | 0.86485767  | 10.68321591 | -2.04459738 |
| H | 1.06303568  | 11.69593879 | -2.39807745 |
| C | 1.00698938  | 9.59669255  | -2.90997871 |
| H | 1.31491646  | 9.75637099  | -3.94422614 |
| C | 0.7641221   | 8.30161687  | -2.44222271 |
| H | 0.88608483  | 7.44563465  | -3.10727826 |
| C | 0.37758482  | 8.09670953  | -1.11759315 |
| H | 0.21941031  | 7.07633048  | -0.76518842 |
| C | -1.02072573 | 10.47452079 | 2.08785902  |
| C | -0.566376   | 10.97767514 | 3.31674014  |
| H | 0.19465376  | 10.42901651 | 3.87602975  |
| C | -1.07752853 | 12.17621948 | 3.82380492  |
| H | -0.71197908 | 12.55802354 | 4.77801063  |
| C | -2.04553305 | 12.88221701 | 3.10668539  |
| H | -2.44294202 | 13.81922213 | 3.50026345  |
| C | -2.5049618  | 12.38832435 | 1.88015861  |
| H | -3.25782244 | 12.93995193 | 1.31483395  |
| C | -1.99676589 | 11.19210177 | 1.37164925  |
| H | -2.35156691 | 10.82760083 | 0.40602493  |
| C | 2.48255388  | 8.57661818  | 2.7522921   |
| C | 3.63924617  | 8.28576866  | 3.95188095  |
| C | 1.39900971  | 7.28054514  | 5.02025565  |
| C | 3.02725268  | 7.70851603  | 5.22368025  |

**Pd(bc)(dppe) [3b].**

| Atom | X           | Y           | Z          |
|------|-------------|-------------|------------|
| Pd   | 15.58256413 | 8.49645518  | 6.2289578  |
| P    | 15.01837909 | 8.30849417  | 8.5542649  |
| P    | 15.65562364 | 6.09576714  | 6.33611364 |
| B    | 16.60307539 | 11.69309857 | 5.97702522 |
| H    | 17.70209199 | 11.29569759 | 6.13361777 |
| B    | 15.45025585 | 11.85015242 | 7.29005019 |
| H    | 15.81232819 | 11.52468236 | 8.37652499 |
| B    | 13.85303729 | 11.44548776 | 6.68008236 |
| H    | 13.06824241 | 10.83262751 | 7.32590635 |
| B    | 14.00459414 | 11.02285348 | 4.98540999 |
| H    | 13.3620404  | 10.16580996 | 4.49223514 |
| B    | 14.57206743 | 12.45614052 | 4.08314336 |
| H    | 14.3200695  | 12.54198452 | 2.92724544 |
| B    | 16.19058608 | 12.87233603 | 4.70074203 |
| H    | 17.04637913 | 13.24474433 | 3.96883882 |
| B    | 16.02820289 | 13.29623364 | 6.42455179 |
| H    | 16.78880618 | 14.05978937 | 6.93408099 |
| B    | 14.31062169 | 13.15470279 | 6.86956146 |
| H    | 13.81359523 | 13.83008373 | 7.71732687 |
| B    | 13.41307777 | 12.62423949 | 5.42319364 |
| H    | 12.27322255 | 12.89844065 | 5.20821138 |
| B    | 14.76445909 | 13.77476568 | 5.26030695 |
| H    | 14.60128367 | 14.9084484  | 4.92990555 |
| B    | 17.82101347 | 9.50511385  | 4.11333045 |
| H    | 18.36938798 | 9.84580307  | 5.10007737 |
| B    | 17.74674001 | 7.82419216  | 3.61953811 |
| H    | 18.27728369 | 7.02636937  | 4.32055908 |
| B    | 16.17142232 | 7.53205003  | 2.89807701 |
| H    | 15.57192947 | 6.52089551  | 3.08538155 |
| B    | 15.25905139 | 9.02957683  | 2.93071524 |
| H    | 14.09517601 | 9.06808693  | 3.11633389 |
| B    | 16.10156743 | 10.2422882  | 1.92530967 |
| H    | 15.47303305 | 11.13064293 | 1.45320178 |
| B    | 16.03378037 | 8.53008543  | 1.43038068 |
| H    | 15.35151433 | 8.19113982  | 0.51347585 |
| B    | 17.58995094 | 7.77323593  | 1.84801716 |
| H    | 18.04839981 | 6.86889236  | 1.22027561 |
| B    | 18.61265529 | 9.01270075  | 2.61822462 |
| H    | 19.80327437 | 9.02161977  | 2.56443472 |
| B    | 17.69761742 | 10.5374246  | 2.66209135 |

|   |             |             |             |
|---|-------------|-------------|-------------|
| H | 18.16144216 | 11.62870242 | 2.69435277  |
| B | 17.54872068 | 9.45636923  | 1.25884024  |
| H | 17.97649458 | 9.7848219   | 0.19572575  |
| C | 15.257256   | 10.61351766 | 6.10059872  |
| C | 15.67866065 | 11.23667068 | 4.58377799  |
| C | 16.33697671 | 8.62816929  | 4.22294213  |
| C | 16.31217381 | 10.21392518 | 3.63083582  |
| C | 15.57892821 | 5.61702877  | 8.14245864  |
| H | 15.3053562  | 4.55600585  | 8.22787885  |
| H | 16.59023284 | 5.73449785  | 8.5573958   |
| C | 14.59045863 | 6.51708165  | 8.87431675  |
| H | 14.5912978  | 6.32733723  | 9.95704275  |
| H | 13.56746987 | 6.35167369  | 8.50728497  |
| C | 16.52815433 | 8.53887633  | 9.58419723  |
| C | 16.53892468 | 8.22514395  | 10.9557677  |
| H | 15.62588933 | 7.89094845  | 11.45161237 |
| C | 17.71376567 | 8.35557337  | 11.69756051 |
| H | 17.71192231 | 8.11336149  | 12.76152402 |
| C | 18.88851274 | 8.80094336  | 11.0804166  |
| H | 19.80516533 | 8.90254986  | 11.66349661 |
| C | 18.88463739 | 9.12013499  | 9.72102789  |
| H | 19.79506954 | 9.47597137  | 9.23724282  |
| C | 17.70887112 | 8.99121009  | 8.9750359   |
| H | 17.70058807 | 9.24774783  | 7.91326066  |
| C | 13.67127949 | 9.18736468  | 9.44304604  |
| C | 13.94097098 | 10.24622502 | 10.32403174 |
| H | 14.96929755 | 10.55010672 | 10.51581248 |
| C | 12.89314246 | 10.92213484 | 10.95344997 |
| H | 13.11608685 | 11.7470196  | 11.63147162 |
| C | 11.56881383 | 10.5515707  | 10.71036025 |
| H | 10.75254689 | 11.0843361  | 11.20027533 |
| C | 11.29182661 | 9.50324225  | 9.82747411  |
| H | 10.25942705 | 9.21547685  | 9.62400127  |
| C | 12.33456322 | 8.82942861  | 9.1907552   |
| H | 12.09675222 | 8.03537847  | 8.48118364  |
| C | 14.09886713 | 5.37022822  | 5.67361223  |
| C | 13.18144533 | 6.20528304  | 5.01728525  |
| H | 13.42636271 | 7.2587865   | 4.86718257  |
| C | 11.96811289 | 5.69193913  | 4.54936639  |
| H | 11.26513929 | 6.34964298  | 4.03678327  |
| C | 11.66268635 | 4.34180812  | 4.73347776  |
| H | 10.71687803 | 3.94013569  | 4.36630869  |
| C | 12.57304246 | 3.50098042  | 5.38424692  |



|   |             |            |            |
|---|-------------|------------|------------|
| H | 12.33947626 | 2.44442833 | 5.52410255 |
| C | 13.7847922  | 4.01035194 | 5.85318907 |
| H | 14.49263642 | 3.34204695 | 6.3466601  |
| C | 17.02267263 | 5.03209254 | 5.72281875 |
| C | 16.88493753 | 4.22135078 | 4.58586054 |
| H | 15.93878556 | 4.18986281 | 4.04695643 |
| C | 17.96340088 | 3.45767019 | 4.13275667 |
| H | 17.84551703 | 2.83509287 | 3.24477418 |
| C | 19.18735286 | 3.49692422 | 4.80445721 |
| H | 20.0283884  | 2.90190281 | 4.44611798 |
| C | 19.33536229 | 4.31253101 | 5.93045388 |
| H | 20.29194895 | 4.35922862 | 6.45264754 |
| C | 18.26363111 | 5.08174583 | 6.38330304 |
| H | 18.40791195 | 5.7366142  | 7.24437378 |

**Pt(bc)(dppe) [3c].**

| Atom | X           | Y          | Z           |
|------|-------------|------------|-------------|
| Pt   | -1.57127888 | 5.16033774 | 10.05138955 |
| P    | -2.65813417 | 6.17826253 | 8.29028714  |
| P    | -3.55382819 | 4.00652176 | 10.30184773 |
| B    | -0.19915394 | 5.39377446 | 13.07347848 |
| H    | -0.53555026 | 6.52233185 | 13.05093001 |
| B    | 1.43513248  | 4.88067805 | 13.57614938 |
| H    | 2.22726566  | 5.71164345 | 13.87512623 |
| B    | 1.90747243  | 3.50044913 | 12.55038509 |
| H    | 3.0191684   | 3.38950701 | 12.15116437 |
| B    | 0.56486637  | 3.16960204 | 11.43215197 |
| H    | 0.7205181   | 2.81917381 | 10.31768321 |
| B    | -0.85629841 | 2.71809476 | 12.35721598 |
| H    | -1.66473941 | 2.03588998 | 11.81187679 |
| B    | 0.76138316  | 2.16857237 | 12.86209245 |
| H    | 1.09908719  | 1.03266379 | 12.7281856  |
| B    | 1.29751685  | 3.21914901 | 14.20067246 |
| H    | 2.02924337  | 2.83599853 | 15.06089994 |
| B    | -0.00299561 | 4.40241299 | 14.51291208 |
| H    | -0.22503051 | 4.88692535 | 15.57957112 |
| B    | -1.32038019 | 4.08245153 | 13.36395287 |
| H    | -2.44830056 | 4.37401701 | 13.57057719 |
| B    | -0.41532269 | 2.72613798 | 14.07865956 |
| H    | -0.94079445 | 1.97899033 | 14.84646882 |
| B    | 1.67169504  | 5.13157743 | 9.28706958  |

|   |             |            |             |
|---|-------------|------------|-------------|
| H | 1.53181399  | 3.98116658 | 9.07611392  |
| B | 3.02908587  | 5.78316241 | 10.24756128 |
| H | 3.81005371  | 5.025678   | 10.72055215 |
| B | 2.40545427  | 7.15708799 | 11.19700806 |
| H | 2.75993654  | 7.33791764 | 12.31453437 |
| B | 0.67818543  | 7.34870002 | 10.80991274 |
| H | -0.13157222 | 7.6712395  | 11.60379083 |
| B | 0.50935602  | 7.72305942 | 9.10459095  |
| H | -0.46256842 | 8.32416913 | 8.77372004  |
| B | 1.12082258  | 6.36373357 | 8.17340595  |
| H | 0.61907009  | 5.9929045  | 7.16833473  |
| B | 2.85626104  | 6.18405183 | 8.52131583  |
| H | 3.59855627  | 5.72205318 | 7.71031981  |
| B | 3.3149822   | 7.44966288 | 9.69299436  |
| H | 4.41151673  | 7.91710079 | 9.72956013  |
| B | 1.85420035  | 8.40995699 | 10.0504317  |
| H | 1.87147999  | 9.56254832 | 10.35633931 |
| B | 2.13746398  | 7.80776877 | 8.39663073  |
| H | 2.36705123  | 8.53881158 | 7.48182934  |
| C | -0.66805607 | 4.33271648 | 11.7746308  |
| C | 0.95487918  | 4.79237031 | 11.9368736  |
| C | 0.28159611  | 6.10891902 | 9.67234133  |
| C | 1.43363806  | 5.77767054 | 10.87044881 |
| C | -4.22699635 | 5.23603316 | 7.93718111  |
| H | -4.89332875 | 5.85592062 | 7.32239418  |
| H | -3.95393616 | 4.34425771 | 7.3549954   |
| C | -4.85755584 | 4.84548562 | 9.2683929   |
| H | -5.71570715 | 4.17143446 | 9.14585044  |
| H | -5.19543279 | 5.73473931 | 9.81941418  |
| C | -1.88672755 | 6.31517159 | 6.64789203  |
| C | -1.58624128 | 5.11382599 | 5.98306734  |
| H | -1.85375216 | 4.15470897 | 6.43120123  |
| C | -0.89297621 | 5.13876213 | 4.77447213  |
| H | -0.65189416 | 4.20340806 | 4.26829827  |
| C | -0.48186094 | 6.35966678 | 4.22923447  |
| H | 0.07745446  | 6.37746722 | 3.29331691  |
| C | -0.77264267 | 7.55394878 | 4.89213023  |
| H | -0.43721628 | 8.50541434 | 4.47835898  |
| C | -1.47360756 | 7.53607468 | 6.09960891  |
| H | -1.66892075 | 8.46884135 | 6.62703062  |
| C | -3.29637202 | 7.82848562 | 8.75919539  |
| C | -3.02774138 | 8.32599885 | 10.04328912 |
| H | -2.38885591 | 7.75285281 | 10.71827517 |

|   |             |             |             |
|---|-------------|-------------|-------------|
| C | -3.56005971 | 9.55355768  | 10.44369648 |
| H | -3.34153576 | 9.9373058   | 11.44073559 |
| C | -4.35745231 | 10.29134504 | 9.56477227  |
| H | -4.76802751 | 11.25283547 | 9.87632314  |
| C | -4.62507917 | 9.80141783  | 8.28147614  |
| H | -5.24100093 | 10.37949223 | 7.5911938   |
| C | -4.09984469 | 8.57282938  | 7.87912254  |
| H | -4.3026496  | 8.20081849  | 6.87332653  |
| C | -4.367009   | 3.82408566  | 11.9188823  |
| C | -4.81062476 | 4.99846103  | 12.5510807  |
| H | -4.69979959 | 5.96571655  | 12.05677755 |
| C | -5.34502124 | 4.94040022  | 13.83672261 |
| H | -5.67927185 | 5.85527371  | 14.32690173 |
| C | -5.4245005  | 3.7142708   | 14.50560445 |
| H | -5.82522645 | 3.67155893  | 15.51911361 |
| C | -4.97560846 | 2.54773789  | 13.88302321 |
| H | -5.01993672 | 1.594201    | 14.40996441 |
| C | -4.44787929 | 2.59807028  | 12.59139371 |
| H | -4.07474203 | 1.68893443  | 12.12191278 |
| C | -3.45519229 | 2.34985941  | 9.52998875  |
| C | -4.58891744 | 1.52636373  | 9.42767858  |
| H | -5.53676871 | 1.8401564   | 9.86851242  |
| C | -4.50175934 | 0.29298135  | 8.78090097  |
| H | -5.3829744  | -0.34603572 | 8.7113939   |
| C | -3.28578804 | -0.12305493 | 8.22701287  |
| H | -3.21989918 | -1.08797183 | 7.72239682  |
| C | -2.15594223 | 0.69285299  | 8.32628615  |
| H | -1.20454036 | 0.36730795  | 7.90432006  |
| C | -2.23729503 | 1.92573687  | 8.97736674  |
| H | -1.35493851 | 2.56197533  | 9.07167467  |

**Pt(tebc)(dtb-bpy) [8], S<sub>0</sub>.**

| Atom | X          | Y           | Z           |
|------|------------|-------------|-------------|
| Pt   | 4.14329669 | -0.11314597 | 8.17752421  |
| N    | 5.32584742 | 1.26298222  | 6.87668211  |
| N    | 2.79800596 | 1.42017394  | 7.6811178   |
| B    | 5.13543457 | -3.14947895 | 7.83832985  |
| H    | 4.15384929 | -3.2653234  | 7.19906101  |
| B    | 5.66670342 | -4.36940745 | 9.02497111  |
| H    | 4.97590482 | -5.32405207 | 9.19776303  |
| B    | 6.42181697 | -3.51920232 | 10.38780123 |

|   |             |             |             |
|---|-------------|-------------|-------------|
| H | 6.26022134  | -3.88525736 | 11.50583817 |
| B | 6.33082191  | -1.76890397 | 10.04089997 |
| H | 6.14220168  | -0.96809373 | 10.88312191 |
| B | 6.537634    | -2.28543989 | 7.2531303   |
| H | 6.47215382  | -1.81690112 | 6.15931922  |
| B | 7.26926286  | -1.43805053 | 8.60513207  |
| H | 7.74304676  | -0.35004557 | 8.515513    |
| B | 8.00153727  | -2.96908178 | 8.02343375  |
| B | 7.45637432  | -4.28397582 | 9.14851793  |
| B | 6.63117215  | -4.0307487  | 7.57423808  |
| H | 6.68478373  | -4.81754273 | 6.6782773   |
| B | 7.83365793  | -2.64607668 | 9.77284684  |
| H | 8.75809032  | -2.42231443 | 10.49214692 |
| B | 2.3445179   | -2.78884934 | 9.11926855  |
| H | 2.46360449  | -3.30953305 | 8.07070854  |
| C | 2.6388779   | -3.76975827 | 10.50417671 |
| H | 2.99015191  | -4.77934381 | 10.30638505 |
| B | 3.38652741  | -2.95347473 | 11.81973924 |
| H | 4.21711678  | -3.5256958  | 12.43743496 |
| B | 3.4929278   | -1.26637312 | 11.26640427 |
| H | 4.41610137  | -0.63711692 | 11.64814473 |
| B | 1.87117297  | -0.63245951 | 10.97216349 |
| B | 1.18082105  | -1.60904678 | 9.64724298  |
| H | 0.36821705  | -1.21217655 | 8.86602848  |
| B | 1.03678358  | -3.29363921 | 10.1958718  |
| H | 0.28100848  | -4.11024847 | 9.77456271  |
| B | 1.66839131  | -3.39852297 | 11.84586825 |
| H | 1.34761463  | -4.29052333 | 12.56293139 |
| B | 2.17854115  | -1.77716133 | 12.32965158 |
| H | 2.16567923  | -1.43797059 | 13.4715173  |
| B | 0.70081754  | -1.96713042 | 11.34142947 |
| C | 5.53875688  | -1.5884514  | 8.49025731  |
| C | 5.08478638  | -2.8545376  | 9.55154262  |
| C | 3.71824304  | -2.56915319 | 10.16112539 |
| B | 2.94620937  | -1.14446767 | 9.5458733   |
| C | 9.39465434  | -3.00646563 | 7.22944021  |
| H | 9.59615312  | -4.04651321 | 6.92231421  |
| H | 9.28052354  | -2.4509094  | 6.28268283  |
| C | 10.61740825 | -2.46260786 | 7.98748182  |
| H | 10.46842421 | -1.41609382 | 8.29235622  |
| H | 11.52910771 | -2.50507248 | 7.37259244  |
| H | 10.80734249 | -3.03828413 | 8.90477386  |
| C | 8.36319139  | -5.56016507 | 9.48820071  |

|   |             |             |             |
|---|-------------|-------------|-------------|
| H | 9.17945085  | -5.61759009 | 8.74834031  |
| H | 8.86365986  | -5.39310699 | 10.45670325 |
| C | 7.63371062  | -6.91359107 | 9.52925656  |
| H | 6.8534428   | -6.92555078 | 10.3049319  |
| H | 8.32664352  | -7.74051717 | 9.74554983  |
| H | 7.1430122   | -7.133892   | 8.56963713  |
| C | -0.78296513 | -1.68775832 | 11.87760152 |
| H | -0.87375804 | -0.61703542 | 12.1257046  |
| H | -1.49836578 | -1.85541931 | 11.05521357 |
| C | -1.2196039  | -2.51962733 | 13.09594451 |
| H | -1.2140757  | -3.5957281  | 12.8691194  |
| H | -2.23665547 | -2.25576713 | 13.4227728  |
| H | -0.54437765 | -2.36415354 | 13.95005267 |
| C | 1.52252747  | 0.91219614  | 11.24375344 |
| H | 2.19019659  | 1.53801169  | 10.62834757 |
| H | 0.50144937  | 1.12460473  | 10.88309765 |
| C | 1.6340956   | 1.37679536  | 12.70659422 |
| H | 0.94398399  | 0.82388665  | 13.35944366 |
| H | 1.4025342   | 2.44795918  | 12.80708958 |
| H | 2.6478037   | 1.21592433  | 13.10017092 |
| C | 6.5957804   | 1.13414126  | 6.45708495  |
| H | 7.05292203  | 0.16160771  | 6.61676407  |
| C | 7.31628926  | 2.16412519  | 5.85617725  |
| H | 8.34226703  | 1.96479636  | 5.55339424  |
| C | 6.72824608  | 3.41999004  | 5.67079815  |
| C | 5.39136636  | 3.53518494  | 6.07674545  |
| H | 4.87185753  | 4.48363446  | 5.9523983   |
| C | 4.71117397  | 2.45821745  | 6.64969081  |
| C | 3.28381885  | 2.50904365  | 7.01384186  |
| C | 2.45078612  | 3.57188448  | 6.64303758  |
| H | 2.88536632  | 4.40845244  | 6.10275025  |
| C | 1.0834873   | 3.56507588  | 6.92618288  |
| C | 0.60582959  | 2.42052883  | 7.58299841  |
| H | -0.44815371 | 2.30690828  | 7.83397779  |
| C | 1.46951441  | 1.39594826  | 7.93557833  |
| H | 1.10108639  | 0.50849885  | 8.44098182  |
| C | 7.4656836   | 4.6196745   | 5.06313754  |
| C | 8.91832136  | 4.27466831  | 4.69163382  |
| H | 9.40681857  | 5.16189147  | 4.26591234  |
| H | 8.97027604  | 3.47529982  | 3.93890591  |
| H | 9.50243537  | 3.96447132  | 5.56935066  |
| C | 7.48188054  | 5.77368595  | 6.09377302  |
| H | 6.46707239  | 6.09232478  | 6.36889365  |

|   |             |            |            |
|---|-------------|------------|------------|
| H | 8.00384347  | 6.64441706 | 5.6715911  |
| H | 8.00376151  | 5.47397271 | 7.01299458 |
| C | 6.72486978  | 5.07733298 | 3.78380476 |
| H | 5.69050871  | 5.38122863 | 3.99481827 |
| H | 6.6966516   | 4.27293016 | 3.0354054  |
| H | 7.24320391  | 5.93988479 | 3.34074709 |
| C | 0.13857991  | 4.71161778 | 6.55101006 |
| C | -0.99033389 | 4.16380762 | 5.6460413  |
| H | -0.58226377 | 3.74054513 | 4.71735545 |
| H | -1.68059644 | 4.9765739  | 5.37829536 |
| H | -1.57448127 | 3.38108418 | 6.14782413 |
| C | 0.86342418  | 5.84241533 | 5.80024886 |
| H | 1.30226005  | 5.49139934 | 4.85498544 |
| H | 1.65778185  | 6.29607517 | 6.41031951 |
| H | 0.14527015  | 6.63648808 | 5.5547618  |
| C | -0.47431723 | 5.2922673  | 7.84851641 |
| H | -1.1681065  | 6.10853315 | 7.60117468 |
| H | 0.30687444  | 5.69411166 | 8.50884989 |
| H | -1.03440922 | 4.53284224 | 8.41014041 |

**Pt(tebc)(dtb-bpy) [8], T<sub>1</sub>.**

| Atom | X          | Y           | Z           |
|------|------------|-------------|-------------|
| Pt   | 4.09257795 | -0.41049265 | 7.66548585  |
| N    | 5.14749894 | 1.45559988  | 7.6747957   |
| N    | 2.69019873 | 0.93243385  | 6.91998323  |
| B    | 4.74029355 | -3.48223152 | 7.79531362  |
| H    | 3.62177445 | -3.54995942 | 7.4298175   |
| B    | 5.41095738 | -4.52913812 | 9.07134763  |
| H    | 4.68955734 | -5.31844252 | 9.59531486  |
| B    | 6.56678328 | -3.57042321 | 10.02324381 |
| H    | 6.64633486 | -3.69968704 | 11.2015399  |
| B    | 6.57865735 | -1.92438513 | 9.34015385  |
| H    | 6.67445    | -0.96567597 | 10.02075958 |
| B    | 6.0349581  | -2.95903283 | 6.73945483  |
| H    | 5.75206625 | -2.66383426 | 5.62116414  |
| B    | 7.1578204  | -1.99627723 | 7.68311941  |
| H    | 7.67802397 | -1.02770739 | 7.22553867  |
| B    | 7.5629146  | -3.70466938 | 7.29969971  |
| B    | 7.17610547 | -4.69430809 | 8.77354242  |
| B    | 6.02109657 | -4.6110659  | 7.40196689  |
| H    | 5.77002756 | -5.5504578  | 6.71066529  |

|   |             |             |             |
|---|-------------|-------------|-------------|
| B | 7.86804402  | -3.04421982 | 8.93577023  |
| H | 8.95900507  | -2.8399948  | 9.37137808  |
| B | 2.37717803  | -2.53231402 | 9.57158608  |
| H | 2.20707831  | -3.2782388  | 8.67689277  |
| C | 2.92534188  | -3.20830939 | 11.05396109 |
| H | 3.13191729  | -4.2759762  | 11.04225913 |
| B | 4.0370323   | -2.22956421 | 11.93644779 |
| H | 4.94198037  | -2.76044151 | 12.48339015 |
| B | 4.14122769  | -0.73701847 | 10.97913103 |
| H | 5.17705478  | -0.16973952 | 10.96350991 |
| B | 2.54444193  | 0.03579286  | 10.8833219  |
| B | 1.47262993  | -1.10673088 | 10.01844975 |
| H | 0.5635391   | -0.75129056 | 9.33249369  |
| B | 1.33401964  | -2.59489663 | 10.98903146 |
| H | 0.44284704  | -3.38158184 | 10.95768421 |
| B | 2.33989357  | -2.41838313 | 12.43476469 |
| H | 2.12784752  | -3.07838942 | 13.39958085 |
| B | 3.08362256  | -0.81177767 | 12.38709816 |
| H | 3.37108384  | -0.23002272 | 13.38612331 |
| B | 1.39457667  | -1.01683278 | 11.81936654 |
| C | 5.4607932   | -1.91965792 | 8.00571109  |
| C | 5.14017016  | -2.87378769 | 9.38507435  |
| C | 3.99236498  | -2.27634558 | 10.20312462 |
| B | 3.18616534  | -0.93688915 | 9.48549965  |
| C | 8.70433265  | -4.09582423 | 6.24628564  |
| H | 8.72400679  | -5.19351615 | 6.13915376  |
| H | 8.40987391  | -3.71896826 | 5.25238875  |
| C | 10.12312353 | -3.59858823 | 6.57100287  |
| H | 10.15362835 | -2.50260794 | 6.66048496  |
| H | 10.84135029 | -3.88836492 | 5.78935323  |
| H | 10.48406957 | -4.01035889 | 7.52437541  |
| C | 7.99625593  | -6.01318739 | 9.16417295  |
| H | 8.4851663   | -6.40306375 | 8.25573169  |
| H | 8.8223815   | -5.7304672  | 9.83770762  |
| C | 7.18459027  | -7.14465637 | 9.81679072  |
| H | 6.72163517  | -6.81518785 | 10.75879303 |
| H | 7.81778519  | -8.0142123  | 10.04724125 |
| H | 6.37422346  | -7.49005549 | 9.15794758  |
| C | 0.12003817  | -0.42530611 | 12.58593652 |
| H | 0.29317101  | 0.64463393  | 12.78780191 |
| H | -0.74819354 | -0.45432062 | 11.9068172  |
| C | -0.25288855 | -1.12661766 | 13.90399468 |
| H | -0.48687291 | -2.18896495 | 13.74252754 |

|   |             |             |             |
|---|-------------|-------------|-------------|
| H | -1.13336951 | -0.66105894 | 14.37127682 |
| H | 0.57162272  | -1.08089951 | 14.6305081  |
| C | 2.37057994  | 1.62462421  | 10.77652875 |
| H | 2.79233562  | 1.96144055  | 9.81559765  |
| H | 1.29406214  | 1.85504863  | 10.7144098  |
| C | 2.99731816  | 2.44955378  | 11.91342532 |
| H | 2.55740419  | 2.193519    | 12.88772985 |
| H | 2.84974553  | 3.5282108   | 11.75507613 |
| H | 4.07941216  | 2.26958558  | 11.99115948 |
| C | 6.42717122  | 1.63901721  | 8.073698    |
| H | 6.9234034   | 0.7664898   | 8.49643561  |
| C | 7.07771077  | 2.85154823  | 7.95902844  |
| H | 8.10277815  | 2.91957319  | 8.31554165  |
| C | 6.41097013  | 3.9696347   | 7.39032302  |
| C | 5.09556894  | 3.76818693  | 6.98879752  |
| H | 4.53536276  | 4.58485464  | 6.53420748  |
| C | 4.44514927  | 2.5281226   | 7.14381159  |
| C | 3.07915588  | 2.25527765  | 6.78388023  |
| C | 2.16037142  | 3.21601152  | 6.30601655  |
| H | 2.49529057  | 4.24730378  | 6.22049272  |
| C | 0.86228603  | 2.877975    | 5.95821582  |
| C | 0.49538267  | 1.51075124  | 6.12643231  |
| H | -0.50485732 | 1.15718718  | 5.88151009  |
| C | 1.41001535  | 0.60147137  | 6.60520921  |
| H | 1.14758109  | -0.44624826 | 6.7480564   |
| C | 7.08715112  | 5.33649607  | 7.20529711  |
| C | 8.51541341  | 5.35567049  | 7.780892    |
| H | 8.95514504  | 6.35194141  | 7.63487322  |
| H | 9.16945654  | 4.62923635  | 7.27860871  |
| H | 8.52397038  | 5.14342007  | 8.8595934   |
| C | 6.25826314  | 6.42535806  | 7.92650233  |
| H | 5.23908506  | 6.49900534  | 7.52314964  |
| H | 6.73755592  | 7.40747721  | 7.80266659  |
| H | 6.18175806  | 6.21353243  | 9.00222096  |
| C | 7.16463962  | 5.66413866  | 5.69492606  |
| H | 6.16762306  | 5.69836185  | 5.23454944  |
| H | 7.75812377  | 4.90998019  | 5.15939722  |
| H | 7.63956662  | 6.64488118  | 5.54486437  |
| C | -0.16051993 | 3.88735754  | 5.42747164  |
| C | -0.65045365 | 3.42644724  | 4.03325239  |
| H | 0.18481359  | 3.37567806  | 3.32059216  |
| H | -1.393769   | 4.13640099  | 3.64193077  |
| H | -1.12224741 | 2.43542155  | 4.07226173  |



|   |             |            |            |
|---|-------------|------------|------------|
| C | 0.43073729  | 5.30106295 | 5.29060198 |
| H | 1.27998056  | 5.32191102 | 4.59230782 |
| H | 0.7639283   | 5.70148465 | 6.25899983 |
| H | -0.3365598  | 5.98297002 | 4.89830704 |
| C | -1.36266771 | 3.94776335 | 6.40004121 |
| H | -2.12034048 | 4.64894924 | 6.02011562 |
| H | -1.04562881 | 4.28900713 | 7.39559373 |
| H | -1.84141649 | 2.96624314 | 6.51677651 |

## References

1. A. B. Pangborn, M. A. Giardello, R. H. Grubbs, R. K. Rosen, F. J. Timmers, *Organometallics* **1996**, *15*, 1518-1520.
2. D. Drew, J. R. Doyle, A. G. Shaver, *Inorg. Synth.* **1990**, *28*, 346-349.
3. McDermott, J. X., White, J. F., Whitesides, G. M., *J. Am. Chem. Soc.* **1976**, *98*, 6521-6528.
4. C. F. Guerra, J. G. Snijders, G. te Velde, E. J. Baerends, *Theo. Chem. Acc.* **1998**, *99*, 391-403; G. te Velde, F. M. Bickelhaupt, E. J. Baerends C. F. Guerra, S. J. A. Van Gisbergen, J. G. Snijders, T. Ziegler, *J. Comput. Chem.* **2001**, *22*, 931-967; ADF 2014/GUI 2014, SCM, Amsterdam, The Netherlands, <http://www.scm.com>, E.J. Baerends, T. Ziegler, J. Autschbach, D. Bashford, A. Bérces, F.M. Bickelhaupt, C. Bo, P.M. Boerrigter, L. Cavallo, D.P. Chong, L. Deng, R.M. Dickson, D.E. Ellis, M. van Faassen, L. Fan, T.H. Fischer, C. Fonseca Guerra, M. Franchini, A. Ghysels, A. Giammona, S.J.A. van Gisbergen, A.W. Götz, J.A. Groeneveld, O.V. Gritsenko, M. Grüning, S. Gusarov, F.E. Harris, P. van den Hoek, C.R. Jacob, H. Jacobsen, L. Jensen, J.W. Kaminski, G. van Kessel, F. Kootstra, A. Kovalenko, M.V. Krykunov, E. van Lenthe, D.A. McCormack, A. Michalak, M. Mitoraj, S.M. Morton, J. Neugebauer, V.P. Nicu, L. Noodleman, V.P. Osinga, S. Patchkovskii, M. Pavanello, P.H.T. Philipsen, D. Post, C.C. Pye, W. Ravenek, J.I. Rodríguez, P. Ros, P.R.T. Schipper, H. van Schoot, G. Schreckenbach, J.S. Seldenthuis, M. Seth, J.G. Snijders, M. Solà, M. Swart, D. Swerhone, G. te Velde, P. Vernooijs, L. Versluis, L. Visscher, O. Visser, F. Wang, T.A. Wesolowski, E.M. van Wezenbeek, G. Wiesenekker, S.K. Wolff, T.K. Woo, A.L. Yakovlev.
5. A. D. Becke, *Phys. Rev. A* **1988**, *38*, 3098-3100.
6. J. P. Perdew, *Phys. Rev. B* **1986**, *33*, 8822-8824.
7. S. Grimme, J. Antony, S. Ehrlich, H. Krieg, *J. Chem. Phys.* **2010**, *132*, 154104.
8. Ren, S., Xie, Z., *Organometallics* **2008**, *27*, 5167-5168.
9. Zheng, Z., Jiang, W., Zinn, A. A., Knobler, C. B., Hawthorne, M. F., *Inorg. Chem.* **1995**, *34*, 2095-2100.
10. G. T. L. Broadwood-Strong, P. A. Chaloner, P. B. Hitchcock, *Polyhedron* **1993**, *12*, 721-729.
11. J. Yang, D. K. Kersi, L. J. Giles, B. W. Stein, C. Feng, C. R. Tichnell, D. A. Shultz, M. L. Kirk, *Inorg. Chem.* **2014**, *53*, 4791-4793.
12. M. J. Martin, W. Y. Man, G. M. Rosair, A. J. Welch, *J. Organomet. Chem.* **2015**, *798*, 36-40.

13. H. J. Bae, H. Kim, K. M. Lee, T. Kim, M. Eo, Y. S. Lee, Y. Do, M. H. Lee, *Dalton Trans.* **2013**, 42, 8549-8552
14. T. Kim, J. Lee, S. U. Lee, M. H. Lee, *Organometallics* **2015**, 34, 3455–3458
15. C. Cornioley-Deuschel, A. von Zelewsky, *Inorg. Chem.* **1987**, 26, 3354-3358
16. C. Shi, H. Sun, Q. Jiang, J. Wang, W. Huang, H. Yan, *Chem. Commun.* **2013**, 49, 4746-4748.
17. C. Shi, H. Sun, X. Tang, W. Lv, H. Yan, Q. Zhao, J. Wang, W. Huang, *Angew. Chem. Int. Ed.* **2013**, 52, 13434-13438.
18. T. Kim, H. Kim, K. M. Lee, Y. S. Lee, M. H. Lee, *Inorg. Chem.* **2013**, 52, 160-168.
19. H. J. Bae, J. Chung, H. Kim, J. Park, K. M. Lee, T.-W. Koh, Y. S. Lee, S. Yoo, Y. Do, M. H. Lee, *Inorg. Chem.* **2014**, 53, 128-138.
20. For crystal structures of corresponding M(bph)(P<sup>^</sup>P) complexes, where P<sup>^</sup>P = chelated diphosphine ligand, see: a) B. L. Edelbach, D. A. Vicic, R. J. Lachicotte, W. D. Jones, *Organometallics* **1998**, 17, 4784-4794; b) D. A. Vicic, W. D. Jones, *J. Am. Chem. Soc.* **1999**, 121, 7606-7617.
21. P. Pyykkö, *Chem. Rev.* **1988**, 88, 563-594.
22. P. Sgarbossa, E. Pizzo, A. Scarso, S. M. Sbovata, R. A. Michelin, M. Mozzon, G. Strukul, F. Benetollo, *J. Organomet. Chem.* **2006**, 691, 3659-3666.
23. G. S. Kazakov, I. B. Sivaev, K. Yu. Suponitsky, A. D. Kirilin, V. I. Bregadze, A. J. Welch, *J. Organomet. Chem.* **2016**, 805, 1-5.
24. M. J. Petersson, W. A. Loughlin, I. D. Jenkins, *Chem. Commun.* **2008**, 37, 4493-4494.

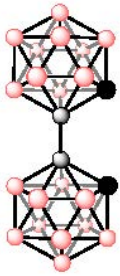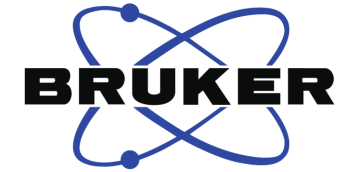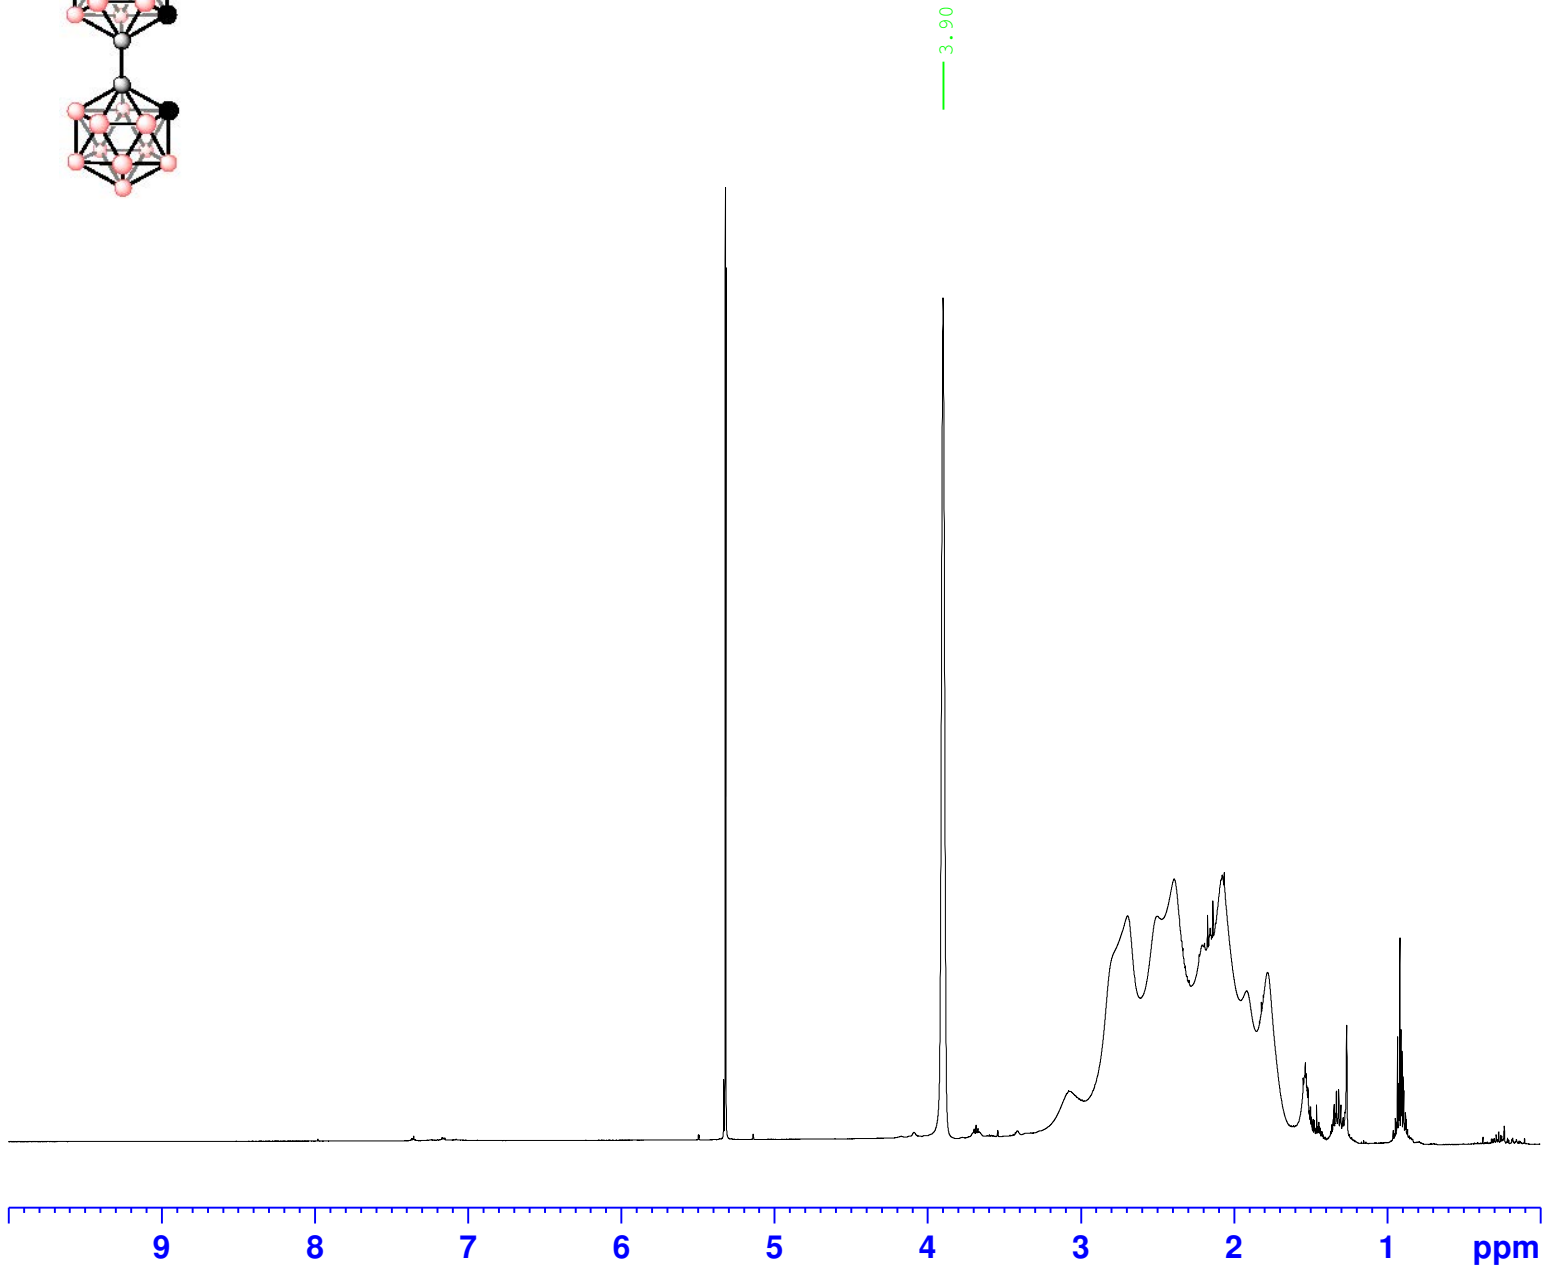

Current Data Parameters  
 NAME bis-carborane  
 EXPNO 10  
 PROCNO 1

F2 - Acquisition Parameters  
 Date\_ 20150918  
 Time 16.05  
 INSTRUM av500  
 PROBHD 5 mm DCH 13C-1  
 PULPROG zg30  
 TD 65536  
 SOLVENT CD2C12  
 NS 24  
 DS 0  
 SWH 10000.000 Hz  
 FIDRES 0.152588 Hz  
 AQ 3.2767999 sec  
 RG 23.34  
 DW 50.000 usec  
 DE 10.00 usec  
 TE 298.0 K  
 D1 2.00000000 sec  
 TD0 1

==== CHANNEL f1 =====  
 SFO1 500.1330008 MHz  
 NUC1 1H  
 P1 10.00 usec  
 PLW1 13.50000000 W

F2 - Processing parameters  
 SI 65536  
 SF 500.1300194 MHz  
 WDW EM  
 SSB 0  
 LB 0.30 Hz  
 GB 0  
 PC 1.00

2.00  
 20.53

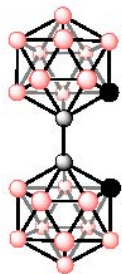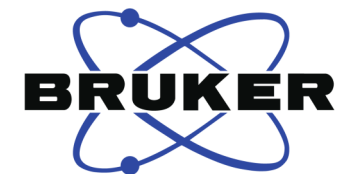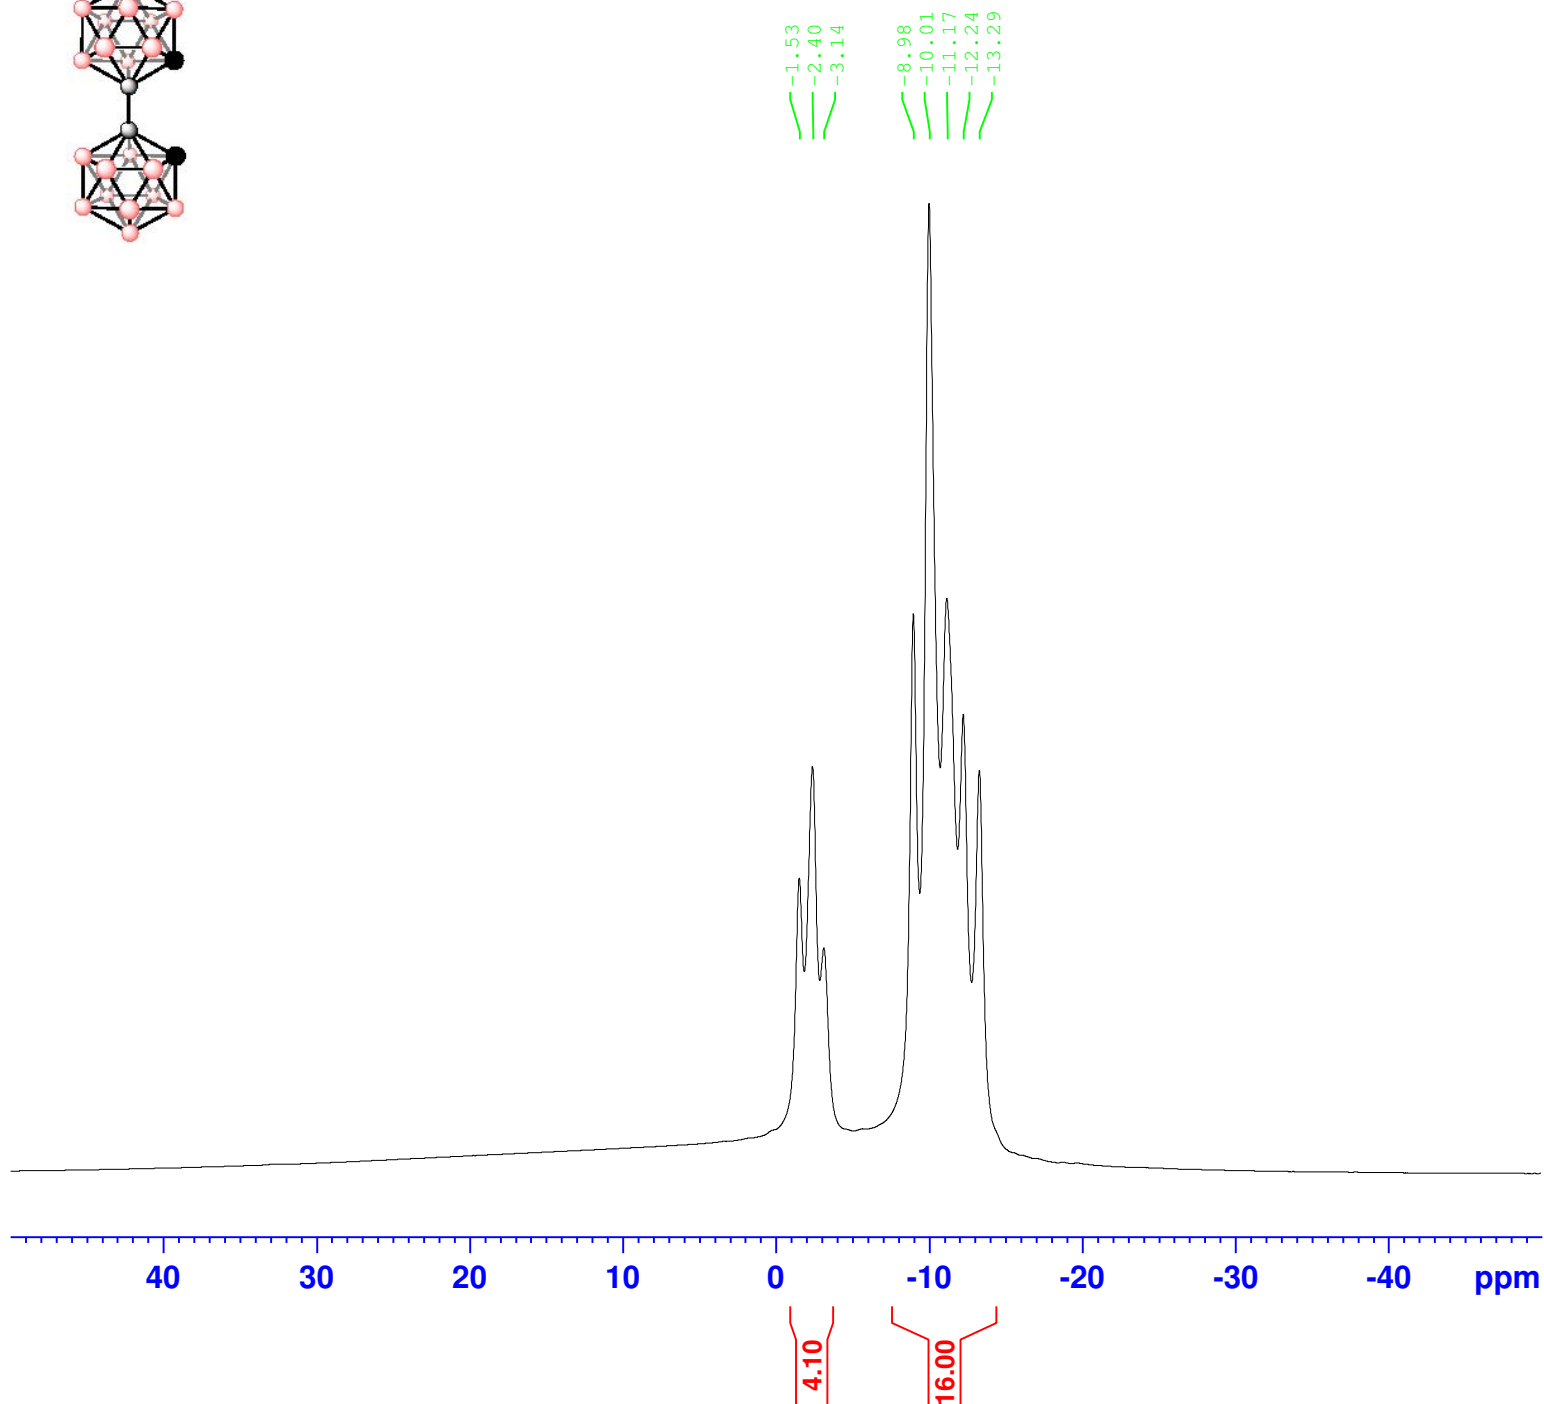

Current Data Parameters  
 NAME bis-carborane 11B  
 EXPNO 3  
 PROCNO 1

F2 - Acquisition Parameters  
 Date\_ 20160114  
 Time 12.31  
 INSTRUM drx500  
 PROBHD 5 mm bb-Z Z800  
 PULPROG zgdc  
 TD 7168  
 SOLVENT D2O  
 NS 4096  
 DS 4  
 SWH 64102.562 Hz  
 FIDRES 8.942880 Hz  
 AQ 0.0559104 sec  
 RG 362  
 DW 7.800 usec  
 DE 6.00 usec  
 TE 296.8 K  
 D1 0.00000400 sec  
 d11 0.03000000 sec  
 TD0 1

==== CHANNEL f1 =====  
 NUC1 11B  
 P1 8.00 usec  
 PL1 -2.00 dB  
 SFO1 160.5257140 MHz

==== CHANNEL f2 =====  
 CPDPRG[2] waltz16  
 NUC2 off  
 PCPD2 100.00 usec  
 PL2 0 dB  
 PL12 17.52 dB  
 SFO2 500.3300000 MHz

F2 - Processing parameters  
 SI 32768  
 SF 160.5257924 MHz  
 WDW EM  
 SSB 0  
 LB 10.00 Hz  
 GB 0  
 PC 1.40

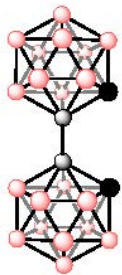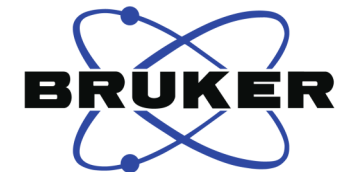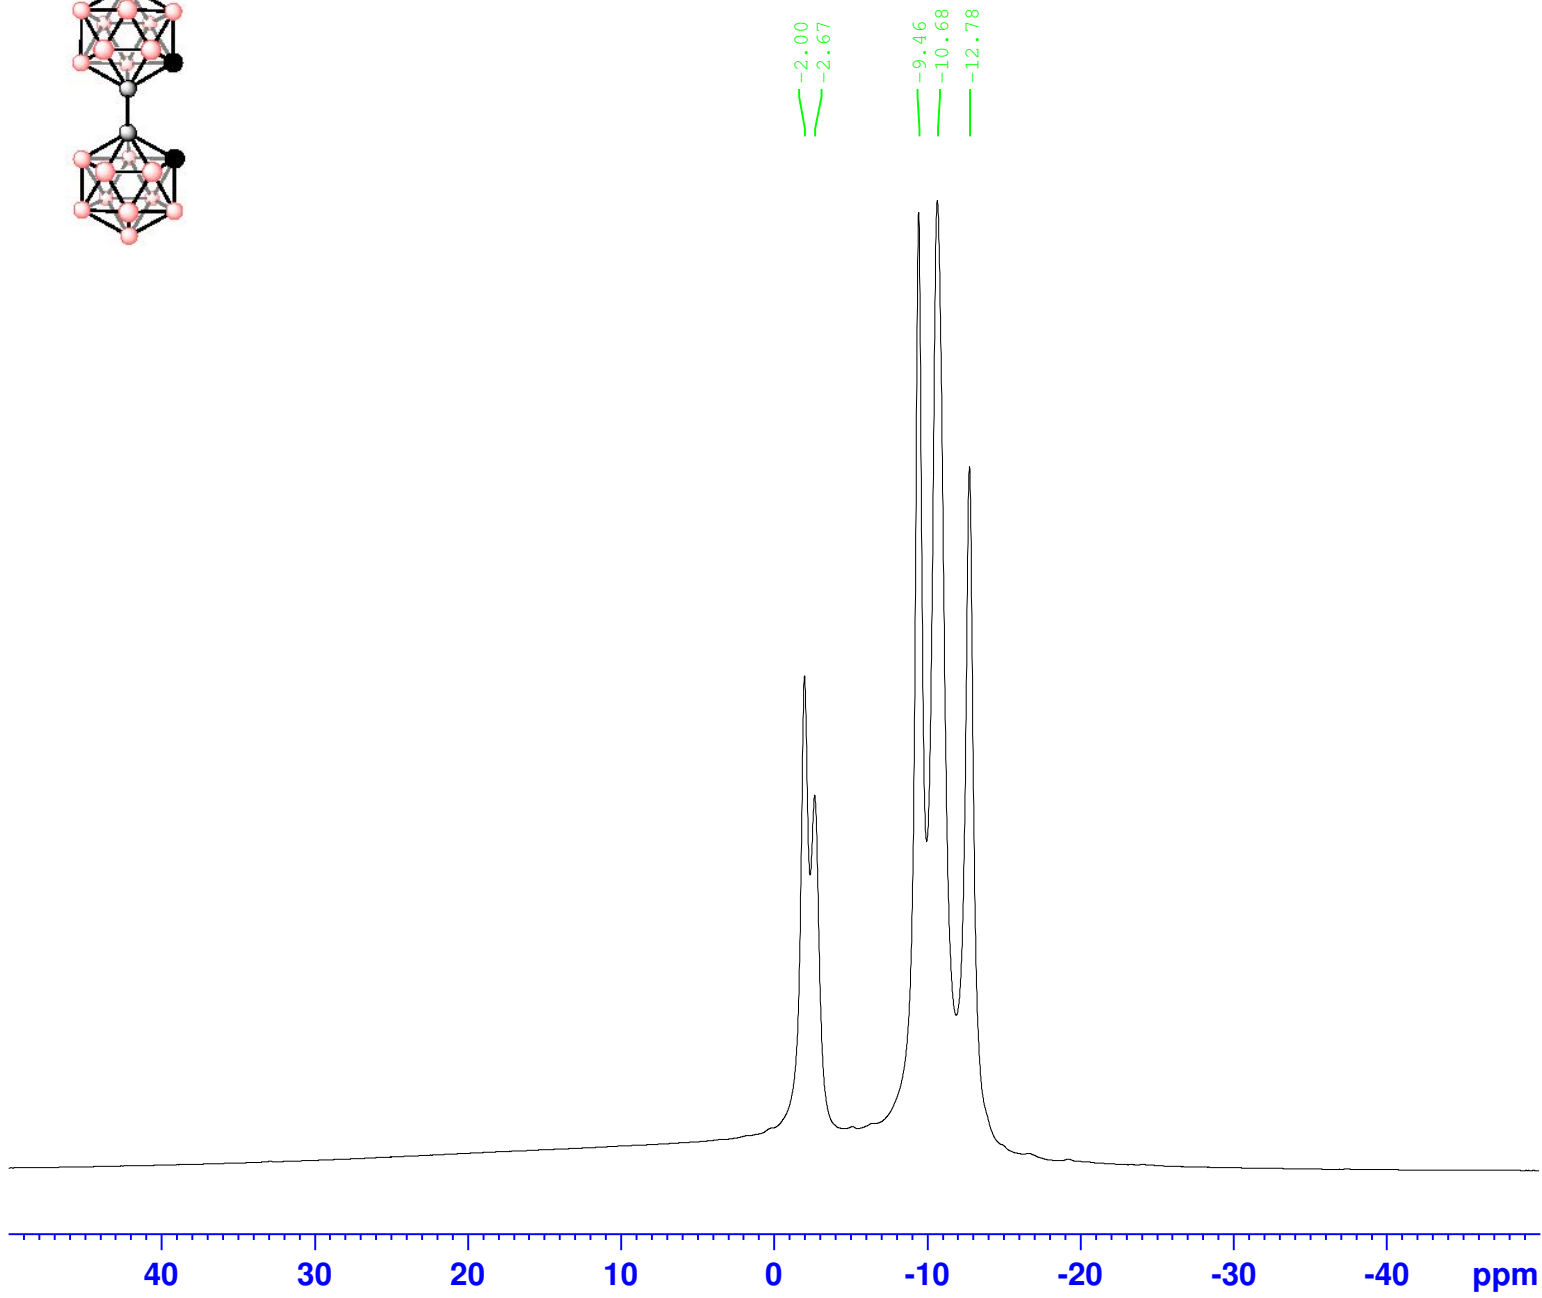

Current Data Parameters  
 NAME bis-carborane 11B  
 EXPNO 2  
 PROCNO 1

F2 - Acquisition Parameters  
 Date\_ 20160114  
 Time 12.22  
 INSTRUM drx500  
 PROBHD 5 mm bb-Z Z800  
 PULPROG zgdc  
 TD 7168  
 SOLVENT D2O  
 NS 4096  
 DS 4  
 SWH 64102.562 Hz  
 FIDRES 8.942880 Hz  
 AQ 0.0559104 sec  
 RG 362  
 DW 7.800 usec  
 DE 6.00 usec  
 TE 297.1 K  
 D1 0.00000400 sec  
 d11 0.03000000 sec  
 TD0 1

==== CHANNEL f1 =====  
 NUC1 11B  
 P1 8.00 usec  
 PL1 -2.00 dB  
 SFO1 160.5257136 MHz

==== CHANNEL f2 =====  
 CPDPRG[2] waltz16  
 NUC2 1H  
 PCPD2 100.00 usec  
 PL2 0 dB  
 PL12 17.52 dB  
 SFO2 500.3330020 MHz

F2 - Processing parameters  
 SI 32768  
 SF 160.5257924 MHz  
 WDW EM  
 SSB 0  
 LB 10.00 Hz  
 GB 0  
 PC 1.40

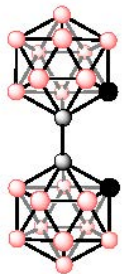

72.31  
63.25

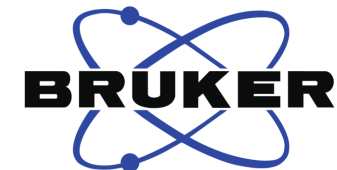

Current Data Parameters  
NAME bis-carborane  
EXPNO 11  
PROCNO 1

F2 - Acquisition Parameters  
Date\_ 20150918  
Time 16.08  
INSTRUM av500  
PROBHD 5 mm DCH 13C-1  
PULPROG zgpg30  
TD 65536  
SOLVENT CD2C12  
NS 32  
DS 2  
SWH 31250.000 Hz  
FIDRES 0.476837 Hz  
AQ 1.0485760 sec  
RG 204.54  
DW 16.000 usec  
DE 18.00 usec  
TE 298.0 K  
D1 2.00000000 sec  
D11 0.03000000 sec  
TD0 1

==== CHANNEL f1 =====  
SFO1 125.7722511 MHz  
NUC1 13C  
P1 9.63 usec  
PLW1 23.00000000 W

==== CHANNEL f2 =====  
SFO2 500.1330008 MHz  
NUC2 1H  
CPDPRG[2] waltz16  
PCPD2 80.00 usec  
PLW2 13.50000000 W  
PLW12 0.21094000 W  
PLW13 0.13500001 W

F2 - Processing parameters  
SI 131072  
SF 125.7577396 MHz  
WDW EM  
SSB 0  
LB 1.00 Hz  
GB 0  
PC 1.40

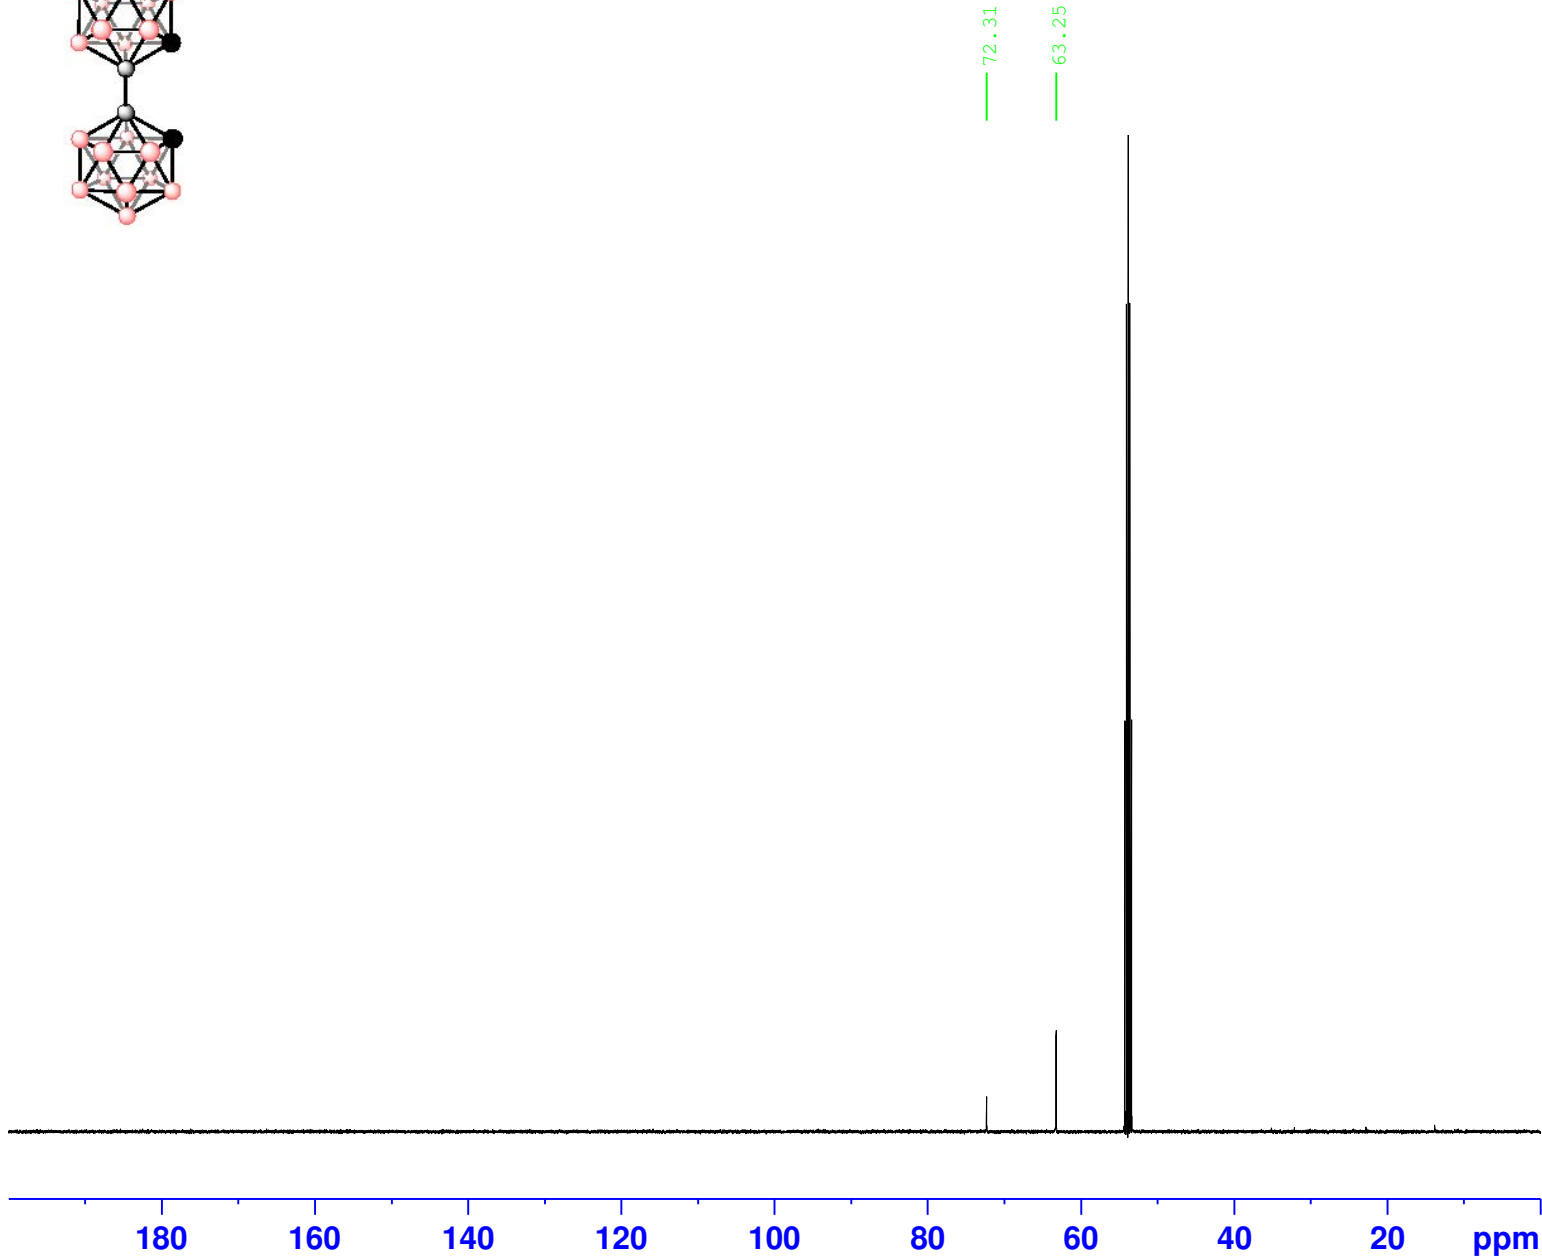

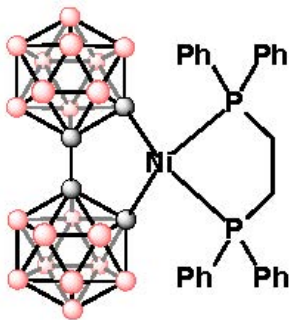

Current Data Parameters  
 NAME kk-1-235 ni(bc) (dppe) pure  
 EXPNO 10  
 PROCNO 1

F2 - Acquisition Parameters  
 Date\_ 20150920  
 Time 16.43  
 INSTRUM av500  
 PROBHD 5 mm DCH 13C-1  
 PULPROG zg30  
 TD 65536  
 SOLVENT CD2Cl2  
 NS 64  
 DS 0  
 SWH 10000.000 Hz  
 FIDRES 0.152588 Hz  
 AQ 3.2767999 sec  
 RG 12.14  
 DW 50.000 usec  
 DE 10.00 usec  
 TE 298.0 K  
 D1 2.00000000 sec  
 TD0 1

==== CHANNEL f1 =====  
 SF01 500.1330008 MHz  
 NUC1 1H  
 P1 10.00 usec  
 PLW1 13.50000000 W

F2 - Processing parameters  
 SI 65536  
 SF 500.1300193 MHz  
 WDW EM  
 SSB 0  
 LB 0.30 Hz  
 GB 0  
 PC 1.00

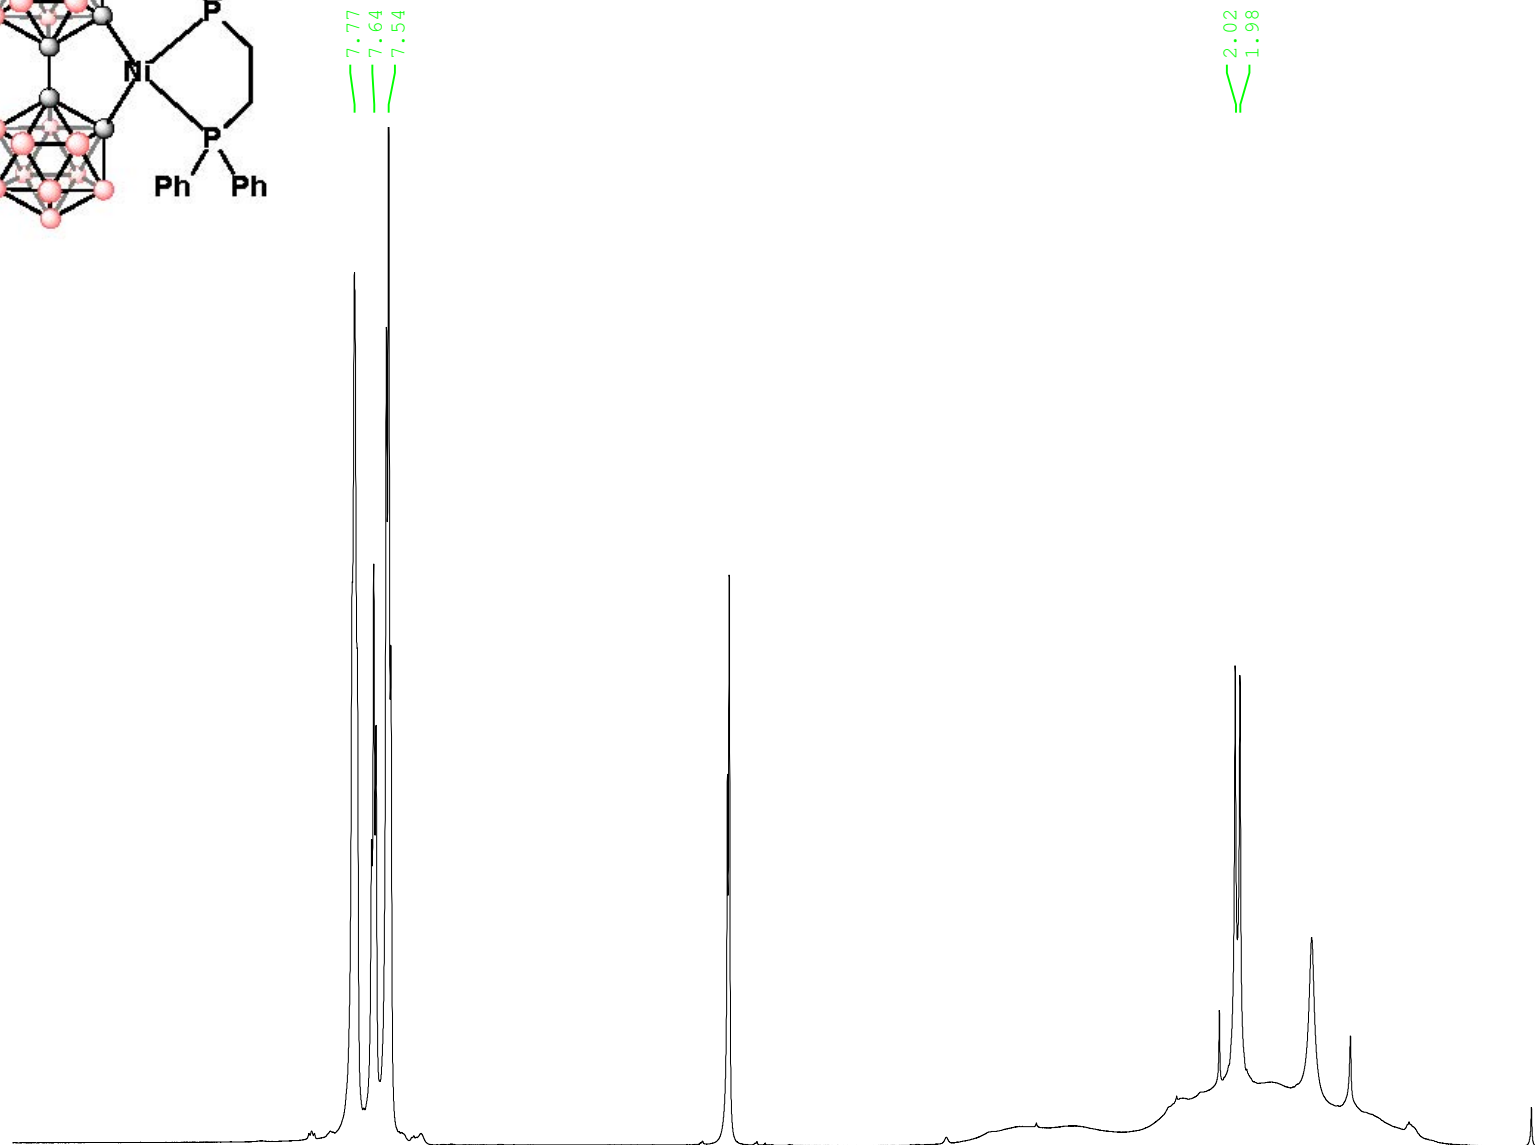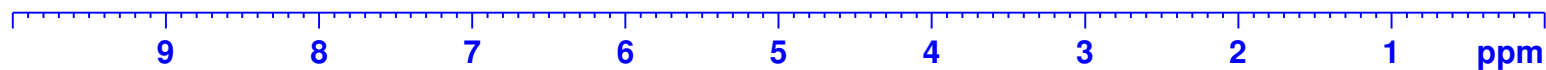

7.52  
3.92  
7.51

26.20  
4.09  
2.52



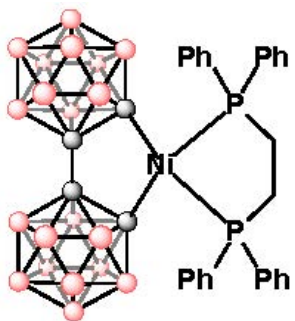

-1.64  
-2.49  
-3.43  
-4.32  
-7.93  
-8.77  
-9.91

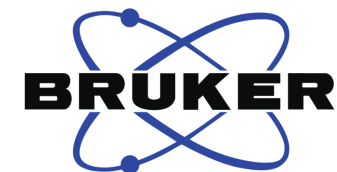

Current Data Parameters  
 NAME kk-1-235 ni(bc) (dppe) pure 11b  
 EXPNO 2  
 PROCNO 1

F2 - Acquisition Parameters  
 Date\_ 20150922  
 Time 14.35  
 INSTRUM drx500  
 PROBHD 5 mm bb-Z Z800  
 PULPROG zgdc  
 TD 7168  
 SOLVENT CD2Cl2  
 NS 4096  
 DS 4  
 SWH 64102.562 Hz  
 FIDRES 8.942880 Hz  
 AQ 0.0559104 sec  
 RG 574.7  
 DW 7.800 usec  
 DE 6.00 usec  
 TE 296.8 K  
 D1 0.00000400 sec  
 d11 0.03000000 sec  
 TD0 1

===== CHANNEL f1 =====  
 NUC1 11B  
 P1 8.00 usec  
 PL1 -2.00 dB  
 SFO1 160.5257140 MHz

===== CHANNEL f2 =====  
 CPDPRG[2] waltz16  
 NUC2 off  
 PCPD2 100.00 usec  
 PL2 0 dB  
 PL12 17.52 dB  
 SFO2 500.3300000 MHz

F2 - Processing parameters  
 SI 32768  
 SF 160.5257717 MHz  
 WDW EM  
 SSB 0  
 LB 10.00 Hz  
 GB 0  
 PC 1.40

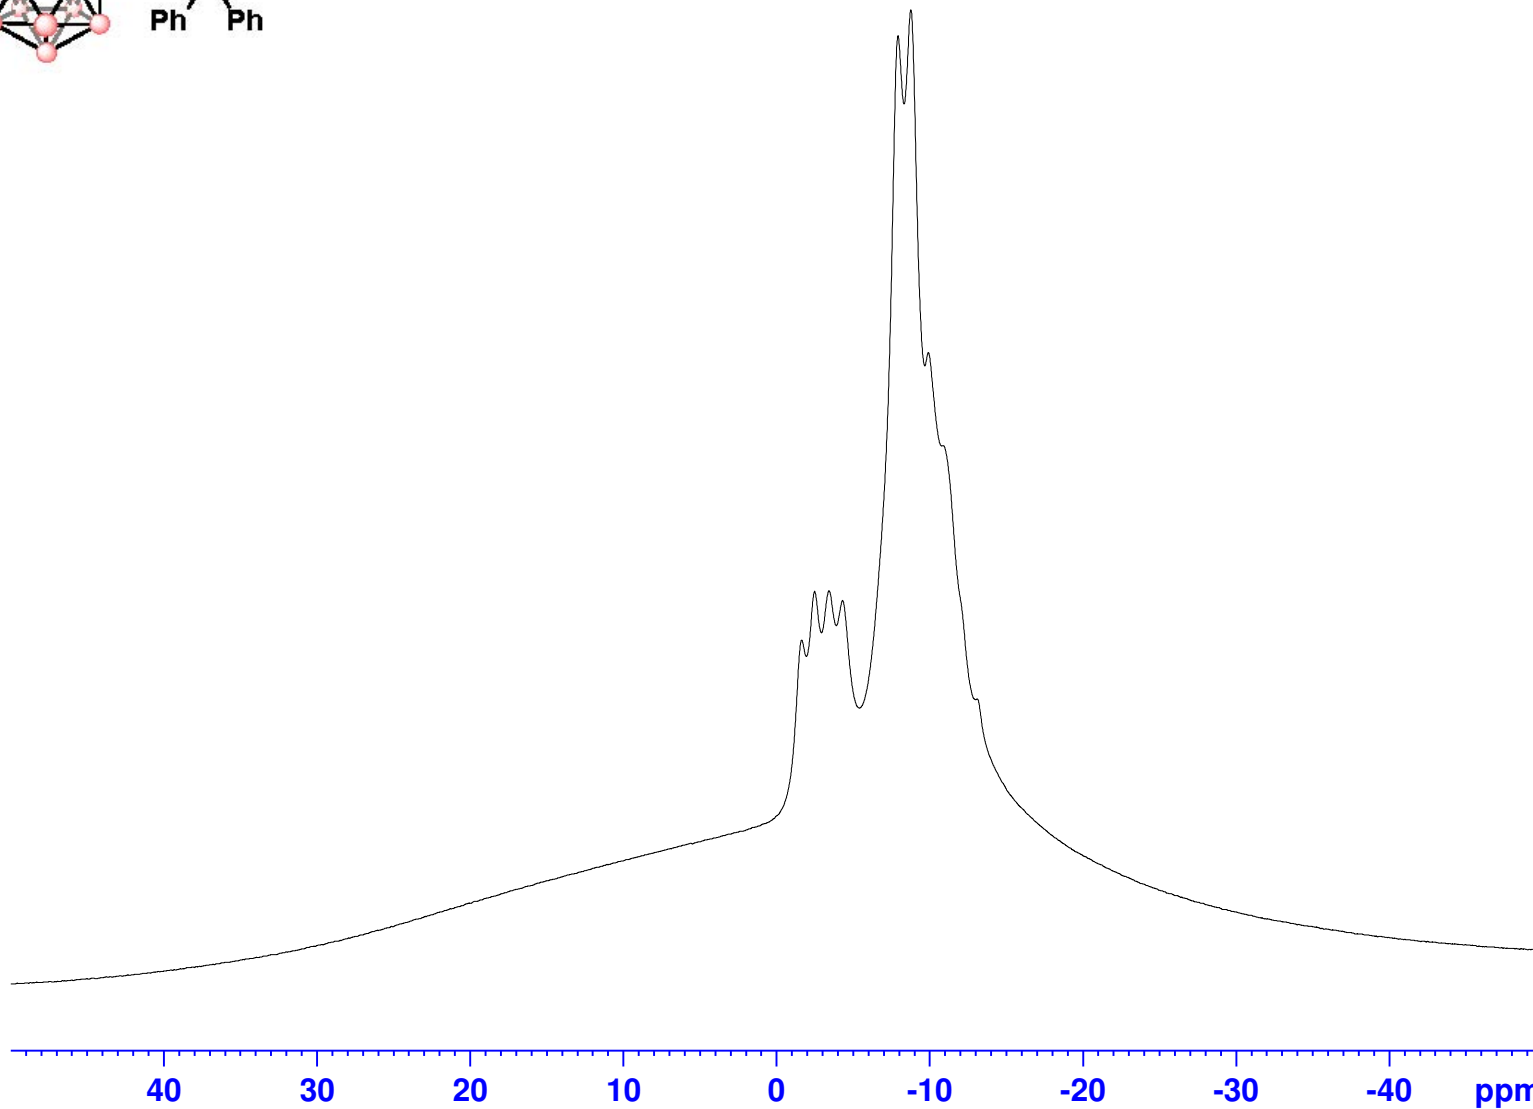

2.00  
2.08  
15.81

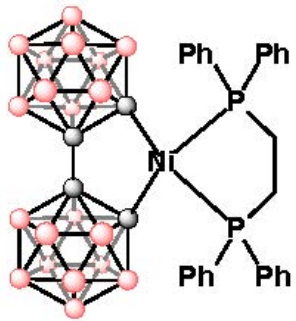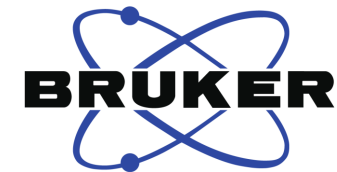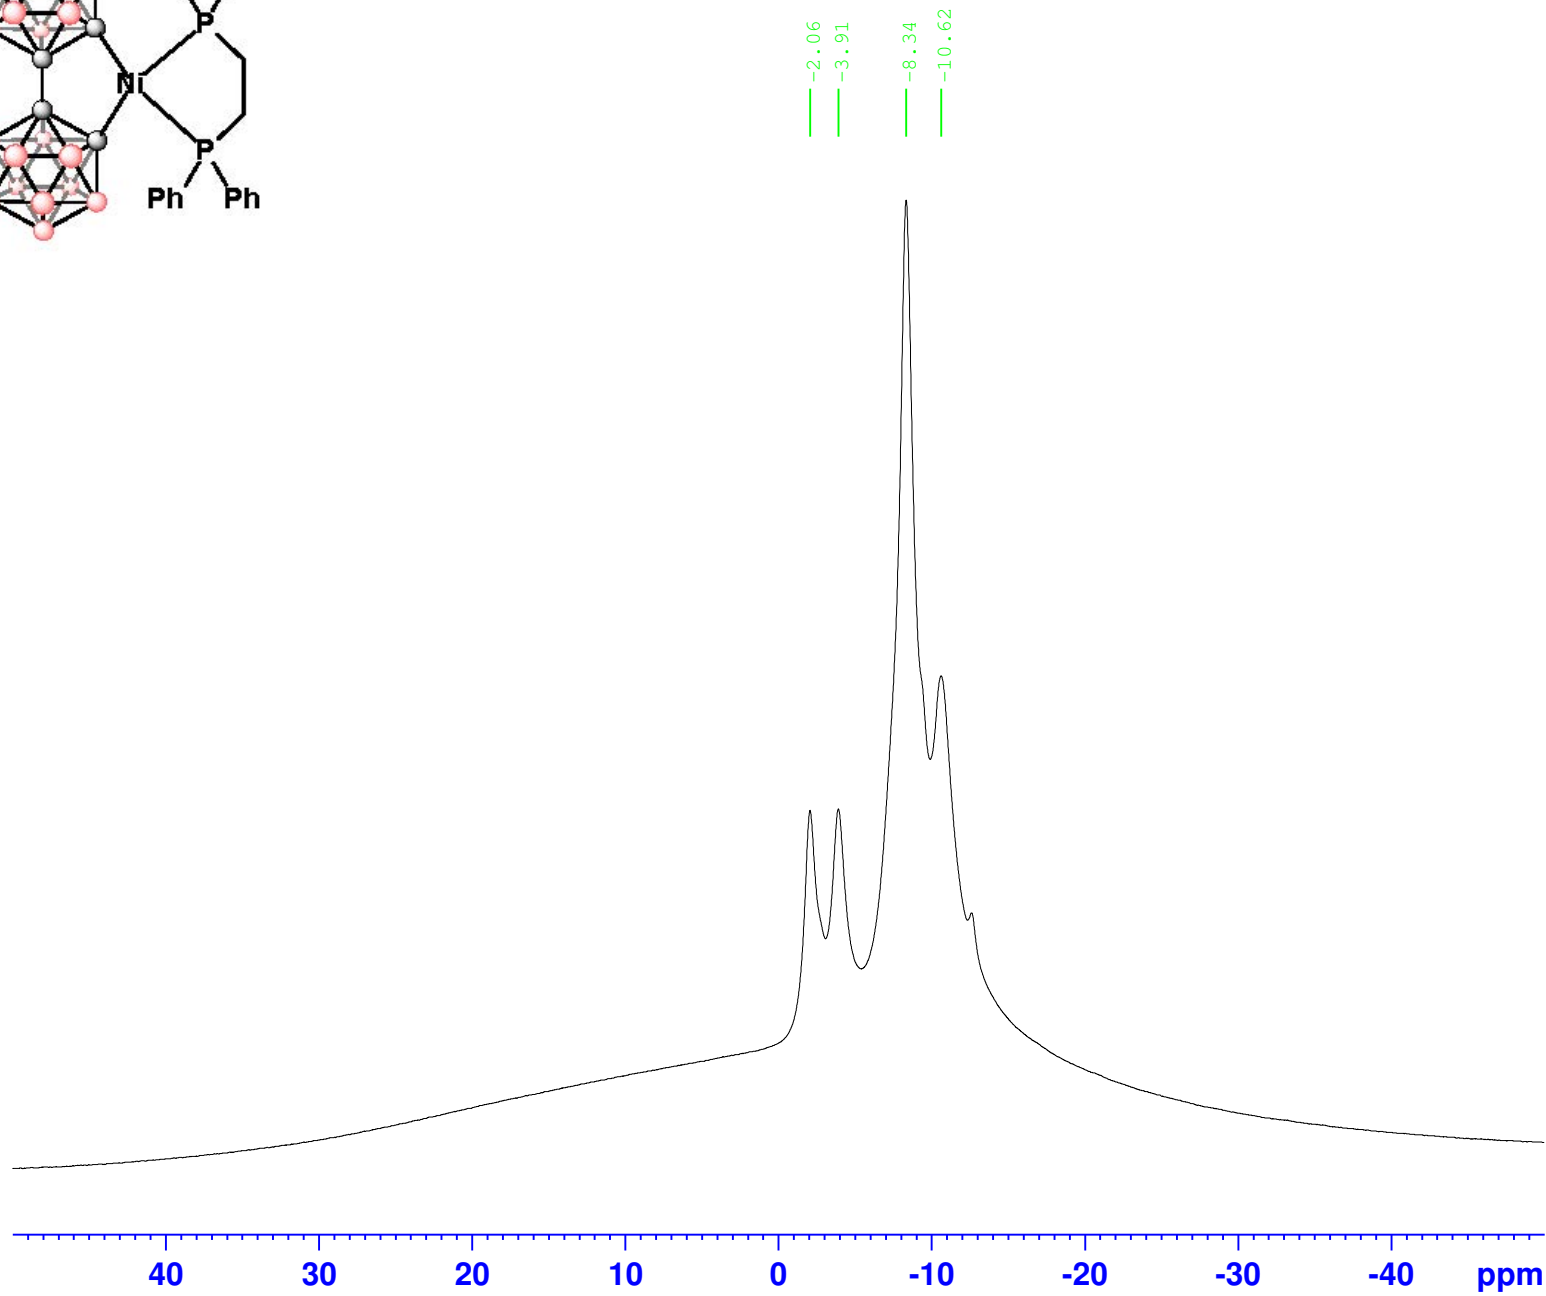

Current Data Parameters  
 NAME Ni(bc) (dppe) pure 11B  
 EXPNO 1  
 PROCNO 1

F2 - Acquisition Parameters  
 Date\_ 20150922  
 Time 13.40  
 INSTRUM drx500  
 PROBHD 5 mm bb-Z Z800  
 PULPROG zgdc  
 TD 7168  
 SOLVENT CD2Cl2  
 NS 4096  
 DS 4  
 SWH 64102.562 Hz  
 FIDRES 8.942880 Hz  
 AQ 0.0559104 sec  
 RG 574.7  
 DW 7.800 usec  
 DE 6.00 usec  
 TE 297.1 K  
 D1 0.00000400 sec  
 d11 0.03000000 sec  
 TD0 1

==== CHANNEL f1 =====  
 NUC1 11B  
 P1 8.00 usec  
 PL1 -2.00 dB  
 SFO1 160.5257136 MHz

==== CHANNEL f2 =====  
 CPDPRG[2] waltz16  
 NUC2 1H  
 PCPD2 100.00 usec  
 PL2 0 dB  
 PL12 17.52 dB  
 SFO2 500.3330020 MHz

F2 - Processing parameters  
 SI 32768  
 SF 160.5257717 MHz  
 WDW EM  
 SSB 0  
 LB 10.00 Hz  
 GB 0  
 PC 1.40

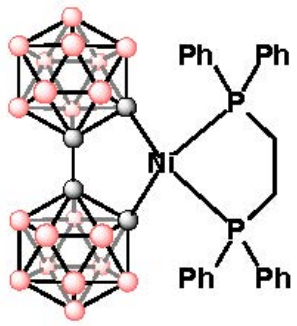

134.62  
132.51  
129.46  
128.09  
127.94  
127.60  
127.45

87.82  
87.52  
87.31  
87.11  
86.80  
84.70

53.84

28.28

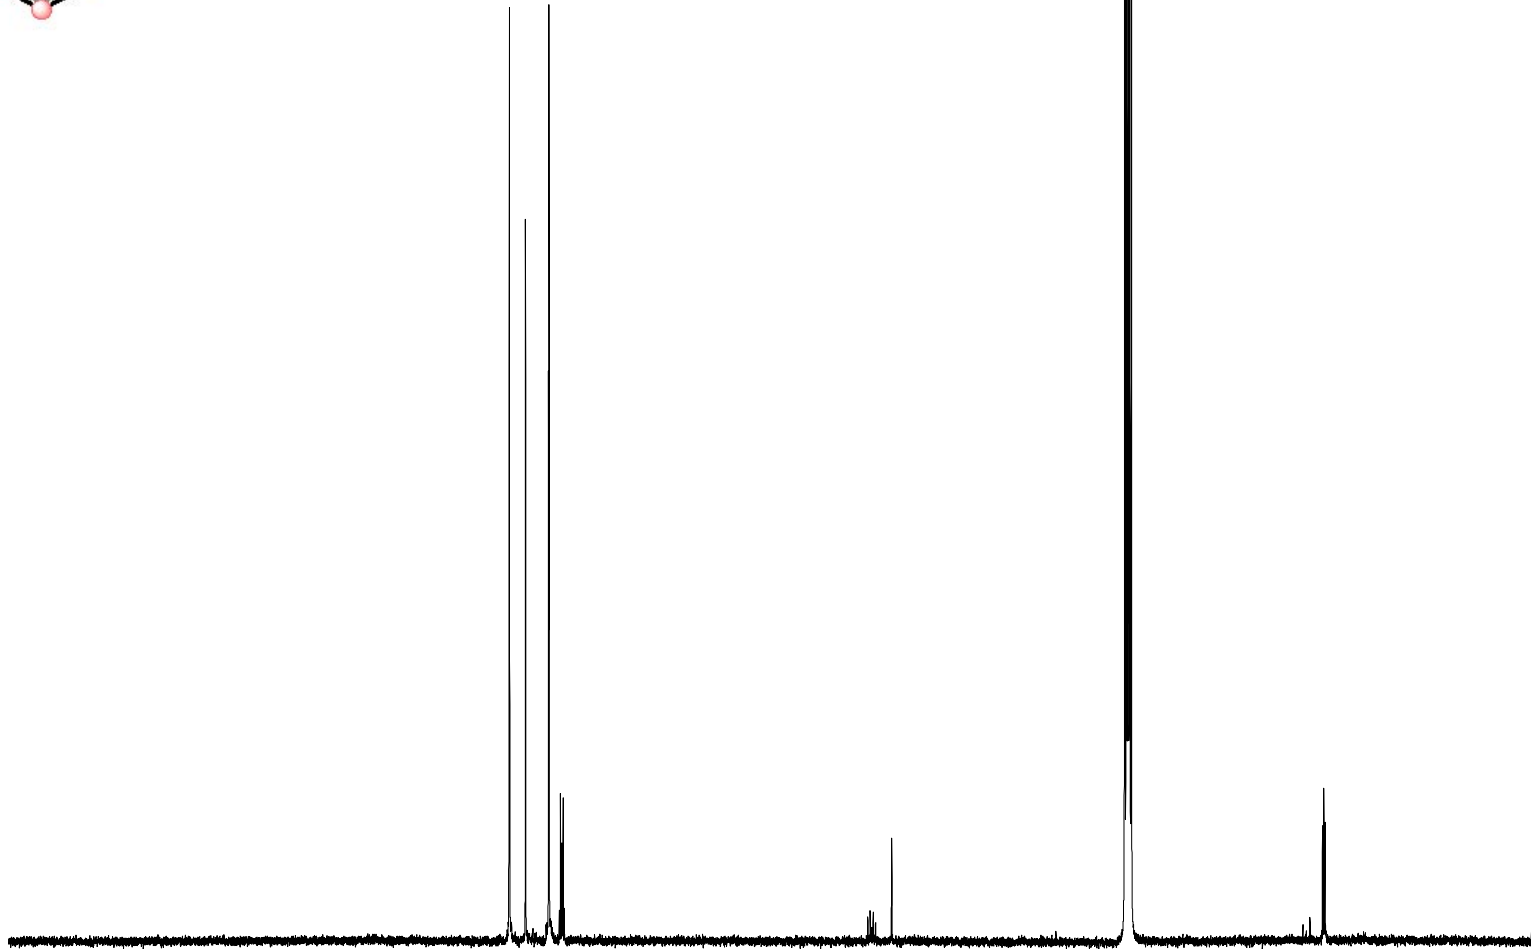

180 160 140 120 100 80 60 40 20 ppm

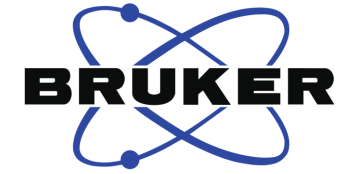

Current Data Parameters  
NAME kk-1-235 ni(bc) (dppe) pure  
EXPNO 11  
PROCNO 1

F2 - Acquisition Parameters  
Date\_ 20150920  
Time 17.37  
INSTRUM av500  
PROBHD 5 mm DCH 13C-1  
PULPROG zgpg30  
TD 65536  
SOLVENT CD2Cl2  
NS 1024  
DS 2  
SWH 31250.000 Hz  
FIDRES 0.476837 Hz  
AQ 1.0485760 sec  
RG 204.54  
DW 16.000 usec  
DE 18.00 usec  
TE 298.0 K  
D1 2.0000000 sec  
D11 0.0300000 sec  
TDO 1

===== CHANNEL f1 =====  
SFO1 125.7722511 MHz  
NUC1 13C  
P1 9.63 usec  
PLW1 23.00000000 W

===== CHANNEL f2 =====  
SFO2 500.1330008 MHz  
NUC2 1H  
CPDPRG[2] waltz16  
PCPD2 80.00 usec  
PLW2 13.50000000 W  
PLW12 0.21094000 W  
PLW13 0.13500001 W

F2 - Processing parameters  
SI 131072  
SF 125.7577378 MHz  
WDW EM  
SSB 0  
LB 1.00 Hz  
GB 0  
PC 1.40

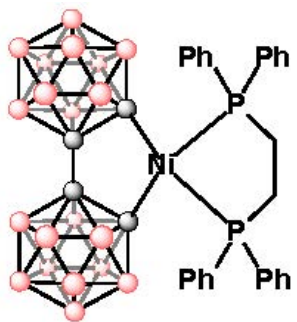

Current Data Parameters  
 NAME kk-1-235 ni(bc) (dppe) pure, 31p  
 EXPNO 1  
 PROCNO 1

F2 - Acquisition Parameters  
 Date\_ 20150920  
 Time 15.34  
 INSTRUM drx500  
 PROBHD 5 mm bb-Z Z800  
 PULPROG zgdc30  
 TD 131072  
 SOLVENT CD2Cl2  
 NS 128  
 DS 0  
 SWH 100000.000 Hz  
 FIDRES 0.762939 Hz  
 AQ 0.6553600 sec  
 RG 9195.2  
 DW 5.000 usec  
 DE 6.00 usec  
 TE 297.1 K  
 D1 2.00000000 sec  
 d11 0.03000000 sec  
 TDO 1

==== CHANNEL f1 =====  
 NUC1 31P  
 P1 9.00 usec  
 PL1 0 dB  
 SFO1 202.5370460 MHz

==== CHANNEL f2 =====  
 CPDPRG[2] waltz16  
 NUC2 1H  
 PCPD2 100.00 usec  
 PL2 0 dB  
 PL12 17.52 dB  
 SFO2 500.3320013 MHz

F2 - Processing parameters  
 SI 131072  
 SF 202.5371980 MHz  
 WDW EM  
 SSB 0  
 LB 1.00 Hz  
 GB 0  
 PC 1.40

49.09

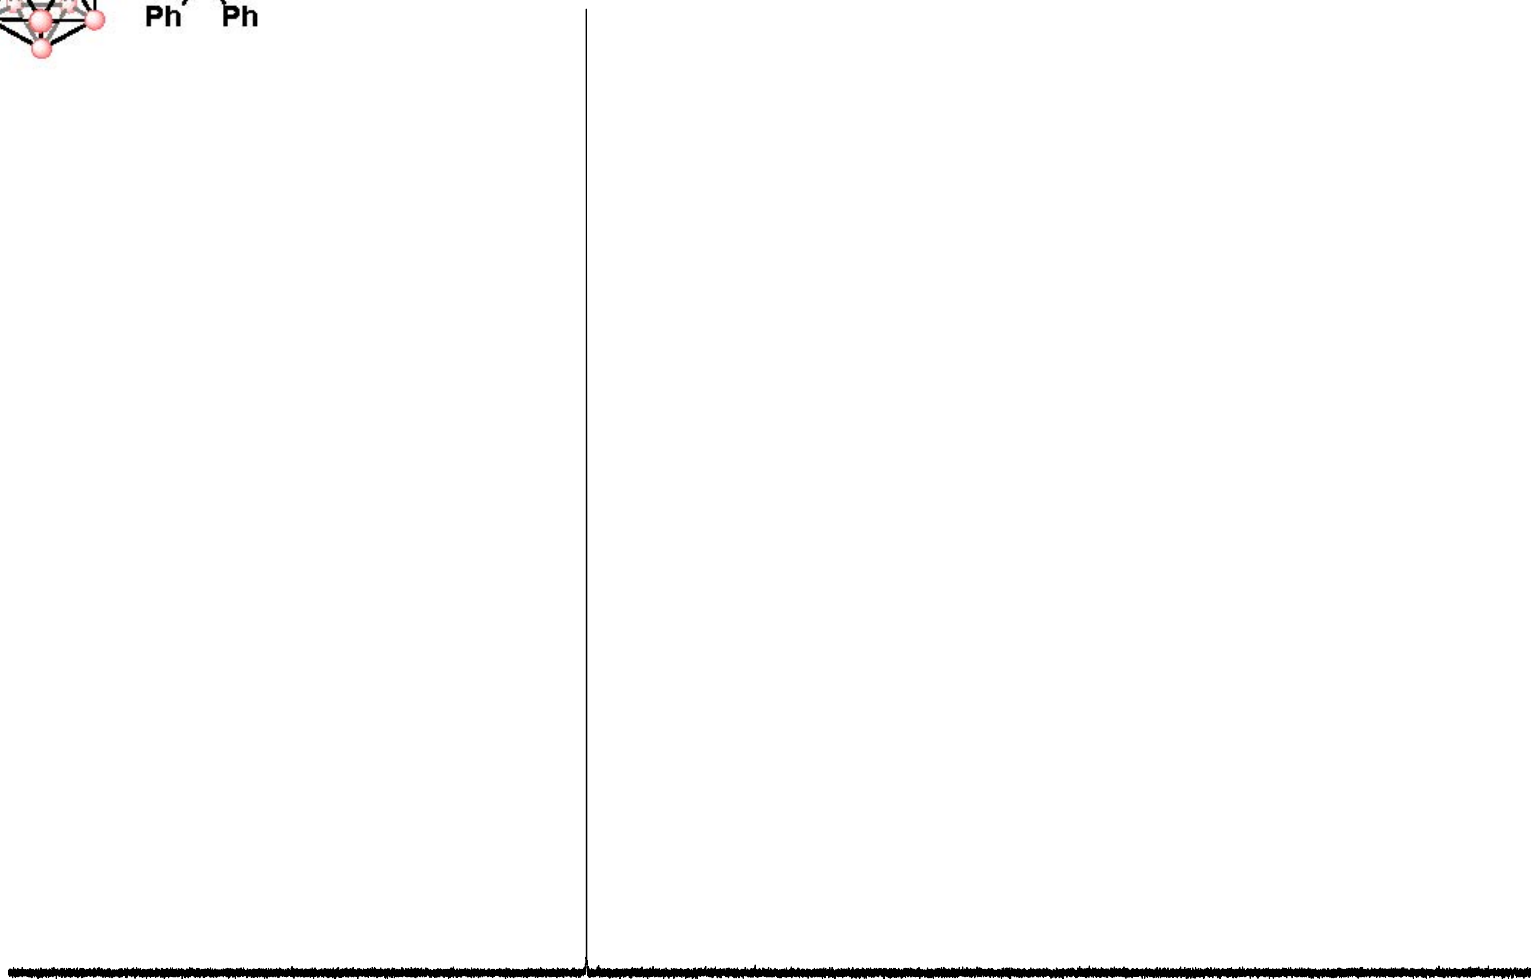

150 100 50 0 -50 -100 -150 ppm

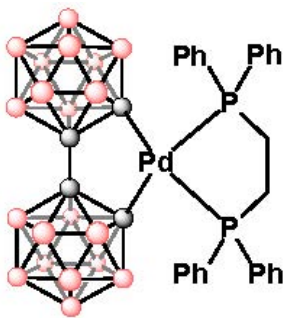

Current Data Parameters  
 NAME kk-1-241 pd(bc) (dppe) pure  
 EXPNO 20  
 PROCNO 1

F2 - Acquisition Parameters  
 Date\_ 20150920  
 Time 19.02  
 INSTRUM av500  
 PROBHD 5 mm DCH 13C-1  
 PULPROG zg30  
 TD 65536  
 SOLVENT CD2Cl2  
 NS 64  
 DS 0  
 SWH 10000.000 Hz  
 FIDRES 0.152588 Hz  
 AQ 3.2767999 sec  
 RG 23.34  
 DW 50.000 usec  
 DE 10.00 usec  
 TE 298.0 K  
 D1 2.00000000 sec  
 TD0 1

==== CHANNEL f1 =====  
 SF01 500.1330008 MHz  
 NUC1 1H  
 P1 10.00 usec  
 PLW1 13.50000000 W

F2 - Processing parameters  
 SI 65536  
 SF 500.1300196 MHz  
 WDW EM  
 SSB 0  
 LB 0.30 Hz  
 GB 0  
 PC 1.00

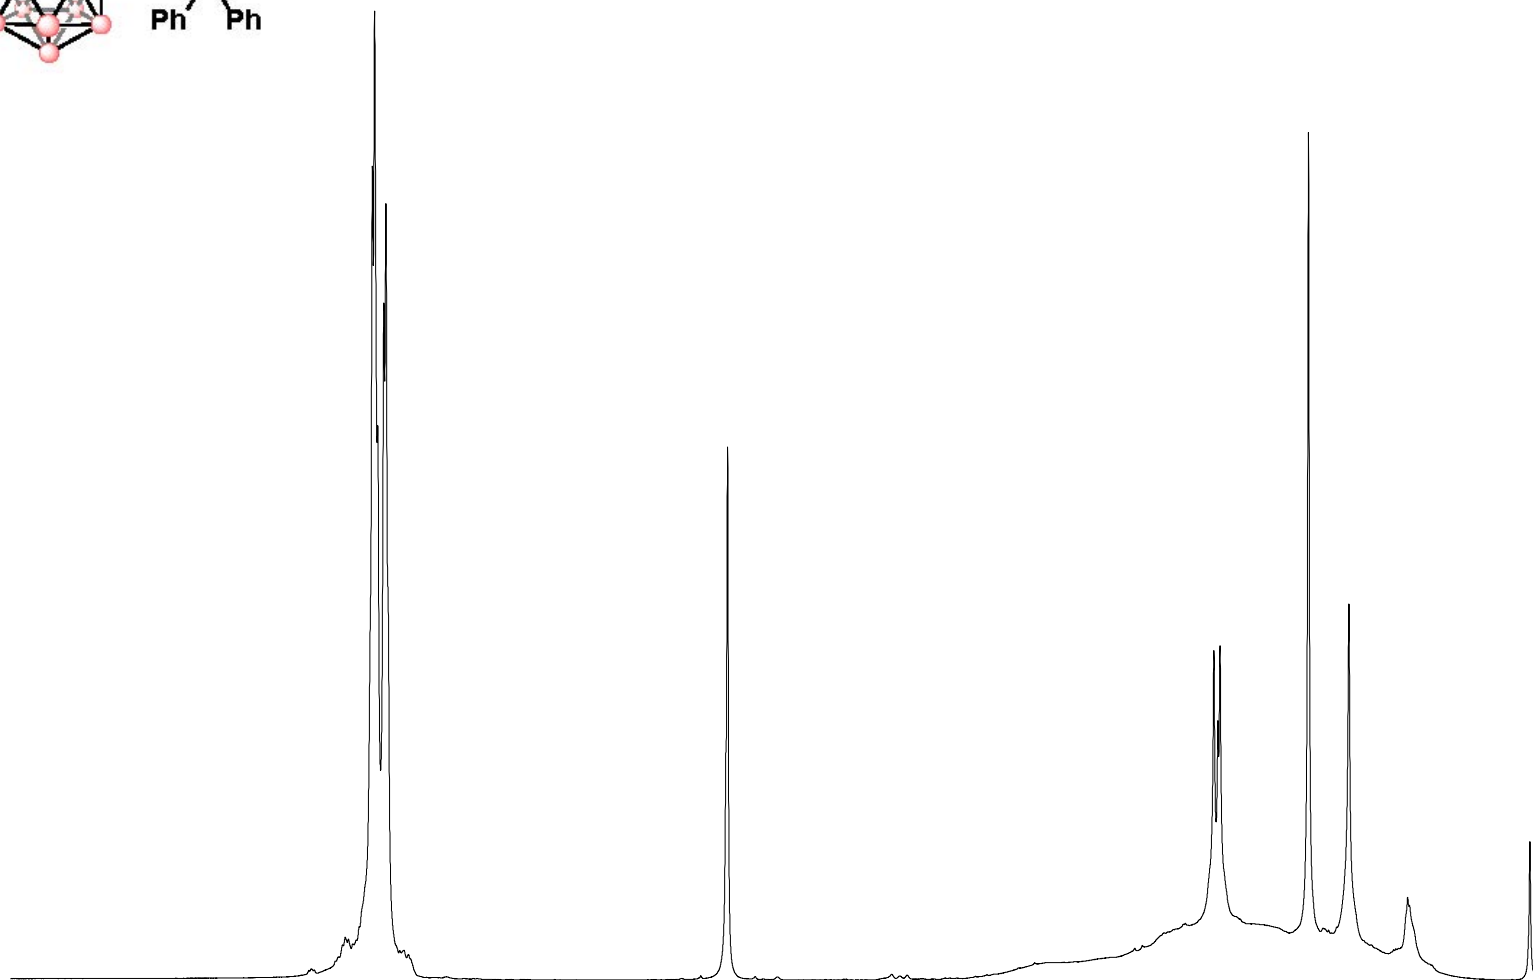

7.64  
7.62  
7.55

2.14  
2.10

4.75  
7.19  
7.80

35.27  
4.28  
5.52  
4.42

9 8 7 6 5 4 3 2 1 ppm

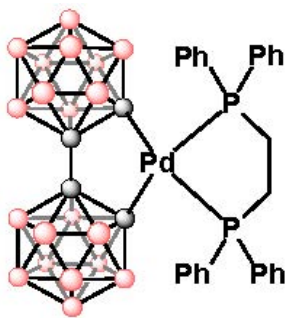

Current Data Parameters  
 NAME kk-1-241 pd(bc) (dppe) pure 11b  
 EXPNO 2  
 PROCNO 1

F2 - Acquisition Parameters  
 Date\_ 20150922  
 Time 14.26  
 INSTRUM drx500  
 PROBHD 5 mm bb-Z Z800  
 PULPROG zgdc  
 TD 7168  
 SOLVENT CD2Cl2  
 NS 4096  
 DS 4  
 SWH 64102.562 Hz  
 FIDRES 8.942880 Hz  
 AQ 0.0559104 sec  
 RG 574.7  
 DW 7.800 usec  
 DE 6.00 usec  
 TE 296.9 K  
 D1 0.00000400 sec  
 d11 0.03000000 sec  
 TD0 1

===== CHANNEL f1 =====  
 NUC1 11B  
 P1 8.00 usec  
 PL1 -2.00 dB  
 SFO1 160.5257140 MHz

===== CHANNEL f2 =====  
 CPDPRG[2] waltz16  
 NUC2 off  
 PCPD2 100.00 usec  
 PL2 0 dB  
 PL12 17.52 dB  
 SFO2 500.3300000 MHz

F2 - Processing parameters  
 SI 32768  
 SF 160.5257717 MHz  
 WDW EM  
 SSB 0  
 LB 10.00 Hz  
 GB 0  
 PC 1.40

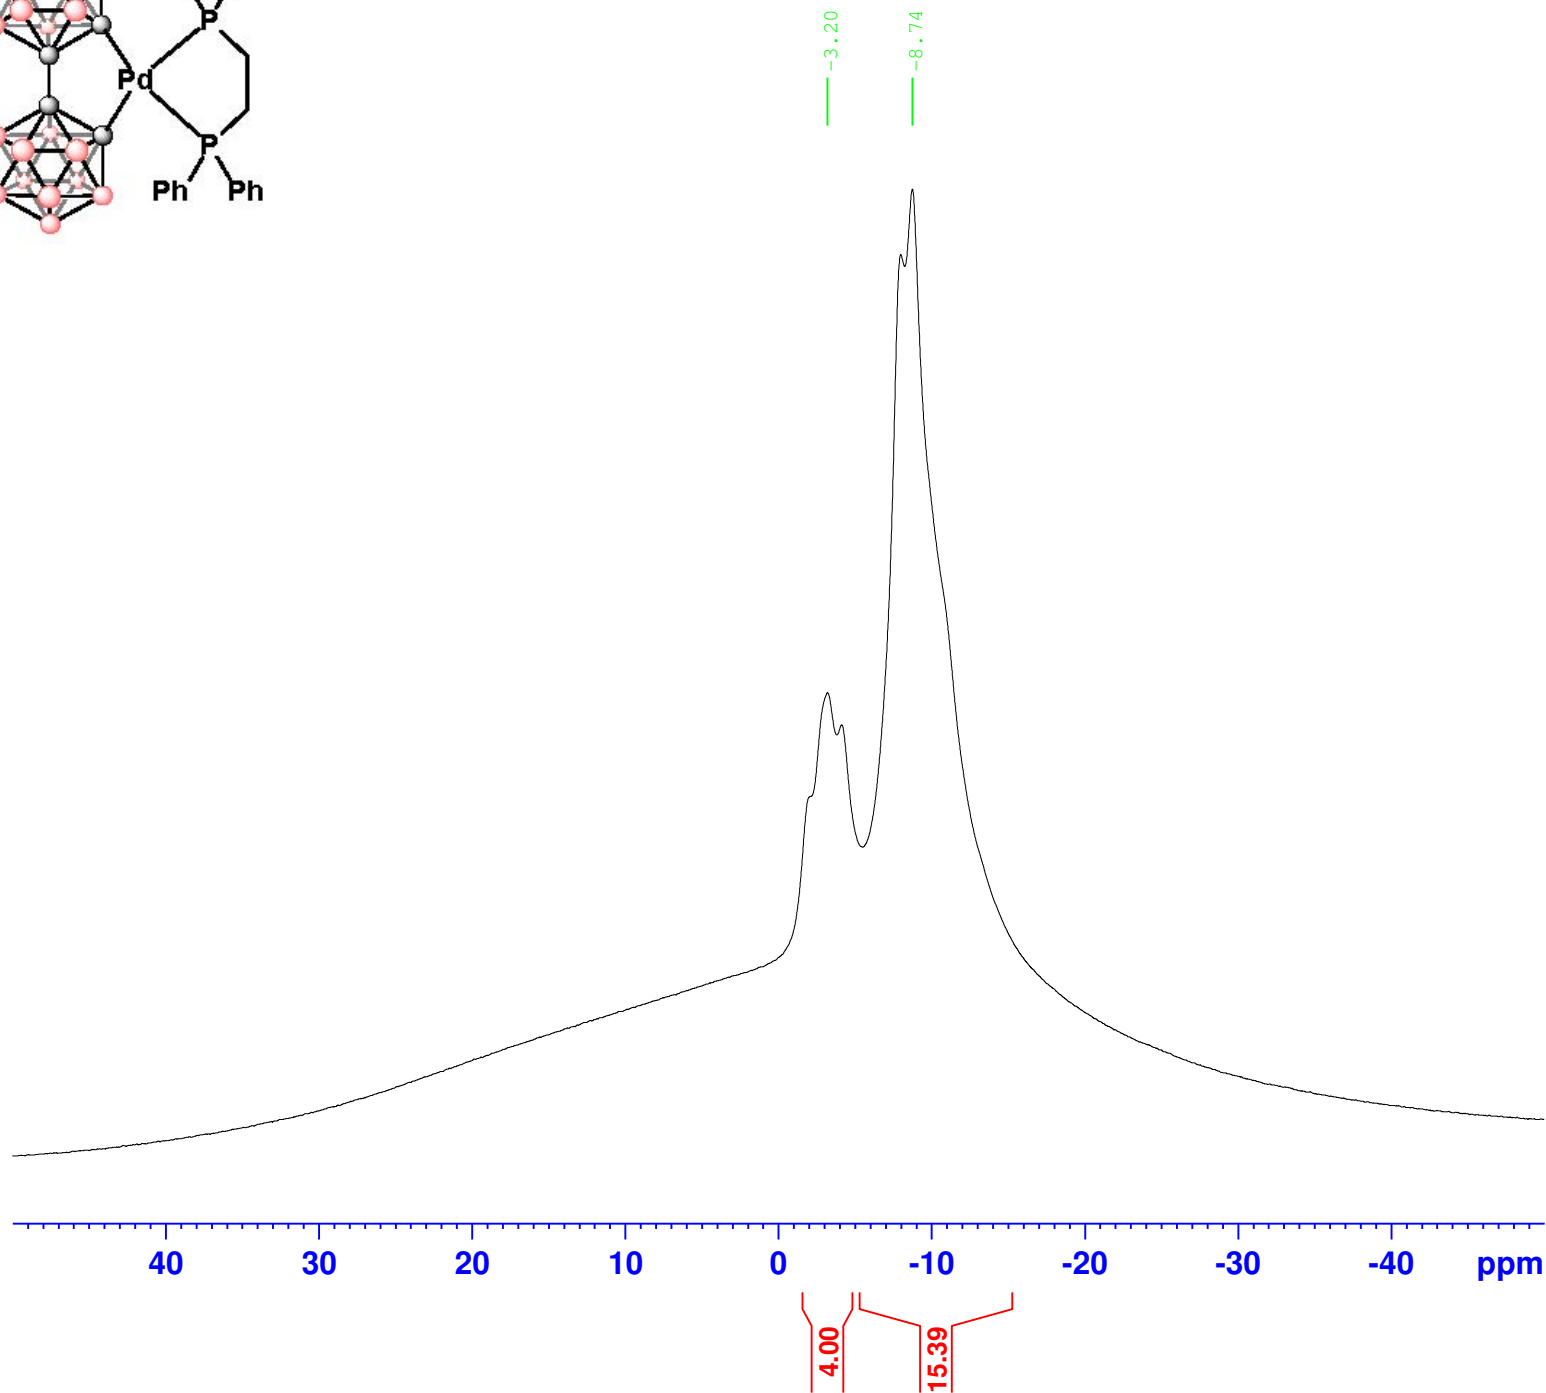

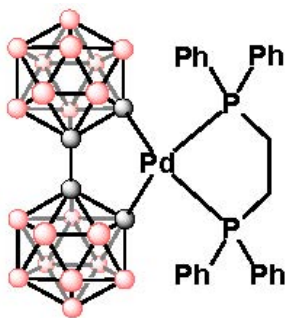

-2.38  
-3.75  
-8.33



Current Data Parameters  
 NAME kk-1-241 pd(bc) (dppe) pure 11b  
 EXPNO 1  
 PROCNO 1

F2 - Acquisition Parameters  
 Date\_ 20150922  
 Time 13.54  
 INSTRUM drx500  
 PROBHD 5 mm bb-Z Z800  
 PULPROG zgdc  
 TD 7168  
 SOLVENT CD2Cl2  
 NS 4096  
 DS 4  
 SWH 64102.562 Hz  
 FIDRES 8.942880 Hz  
 AQ 0.0559104 sec  
 RG 574.7  
 DW 7.800 usec  
 DE 6.00 usec  
 TE 297.1 K  
 D1 0.00000400 sec  
 d11 0.03000000 sec  
 TD0 1

===== CHANNEL f1 =====  
 NUC1 11B  
 P1 8.00 usec  
 PL1 -2.00 dB  
 SFO1 160.5257136 MHz

===== CHANNEL f2 =====  
 CPDPRG[2] waltz16  
 NUC2 1H  
 PCPD2 100.00 usec  
 PL2 0 dB  
 PL12 17.52 dB  
 SFO2 500.3330020 MHz

F2 - Processing parameters  
 SI 32768  
 SF 160.5257717 MHz  
 WDW EM  
 SSB 0  
 LB 10.00 Hz  
 GB 0  
 PC 1.40

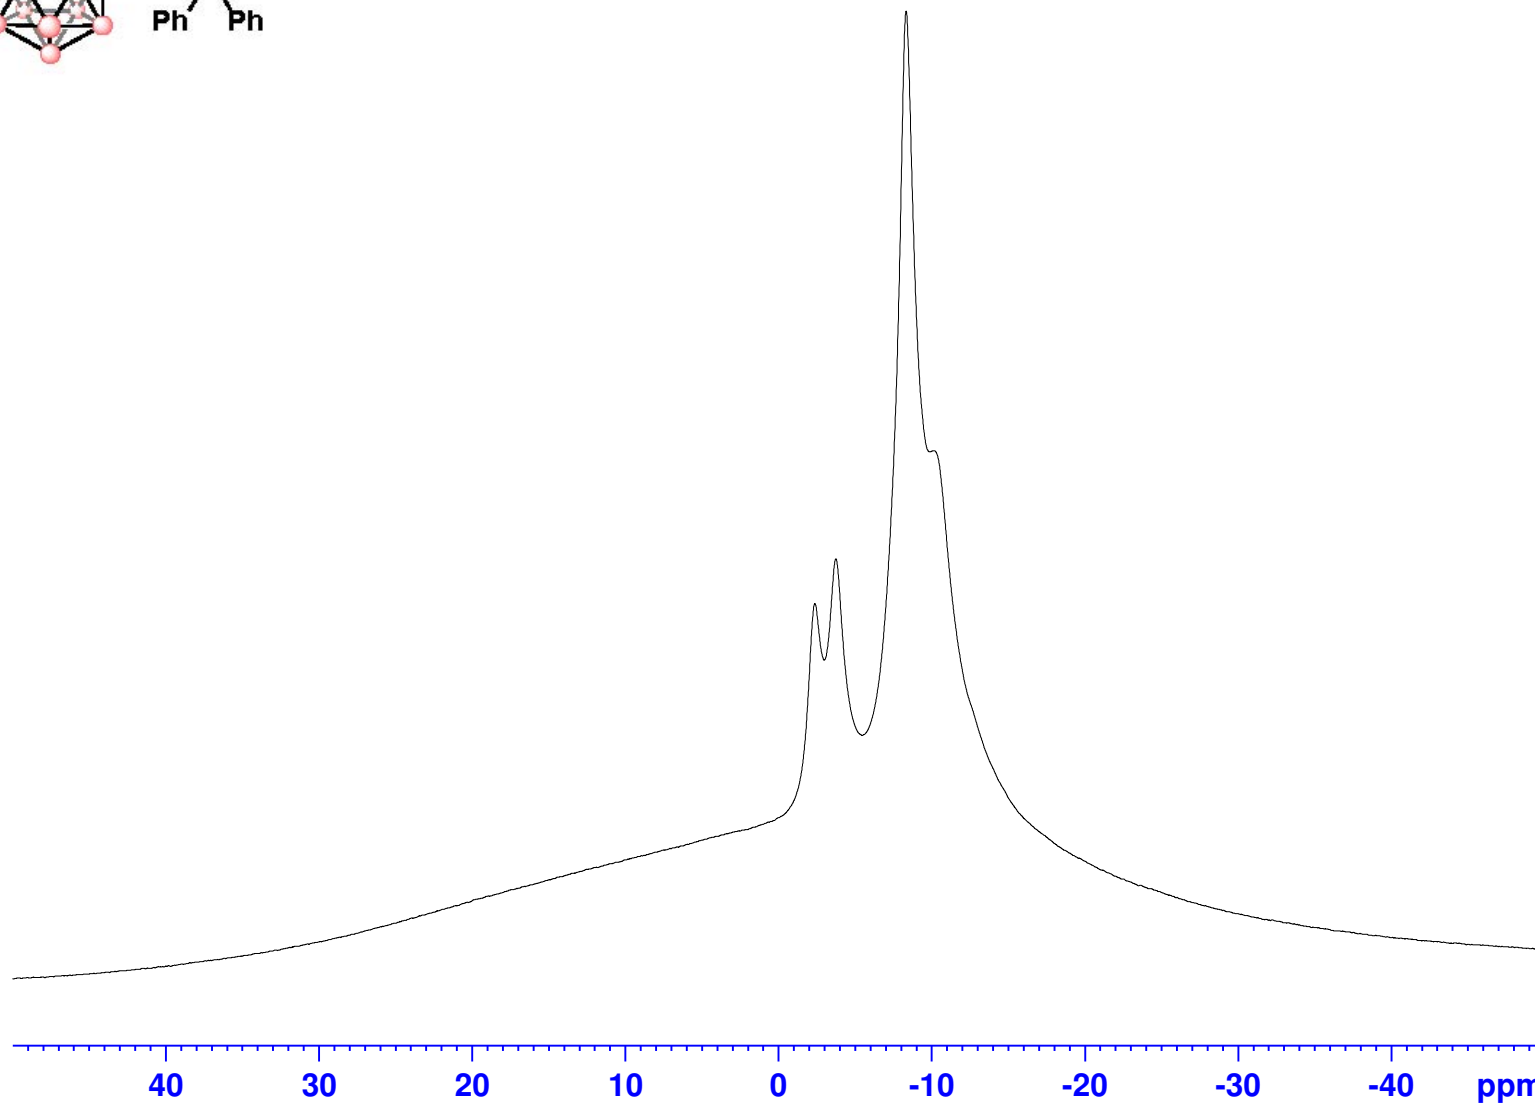

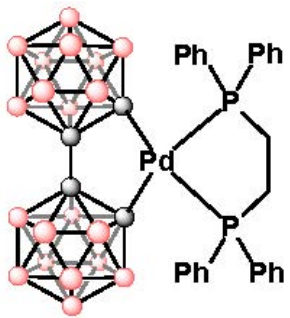

134.62  
134.57  
134.53  
132.74  
129.68  
129.64  
129.60  
127.32  
126.96

92.51  
92.40  
91.41  
91.30  
84.80

30.09  
29.00  
28.82  
28.64

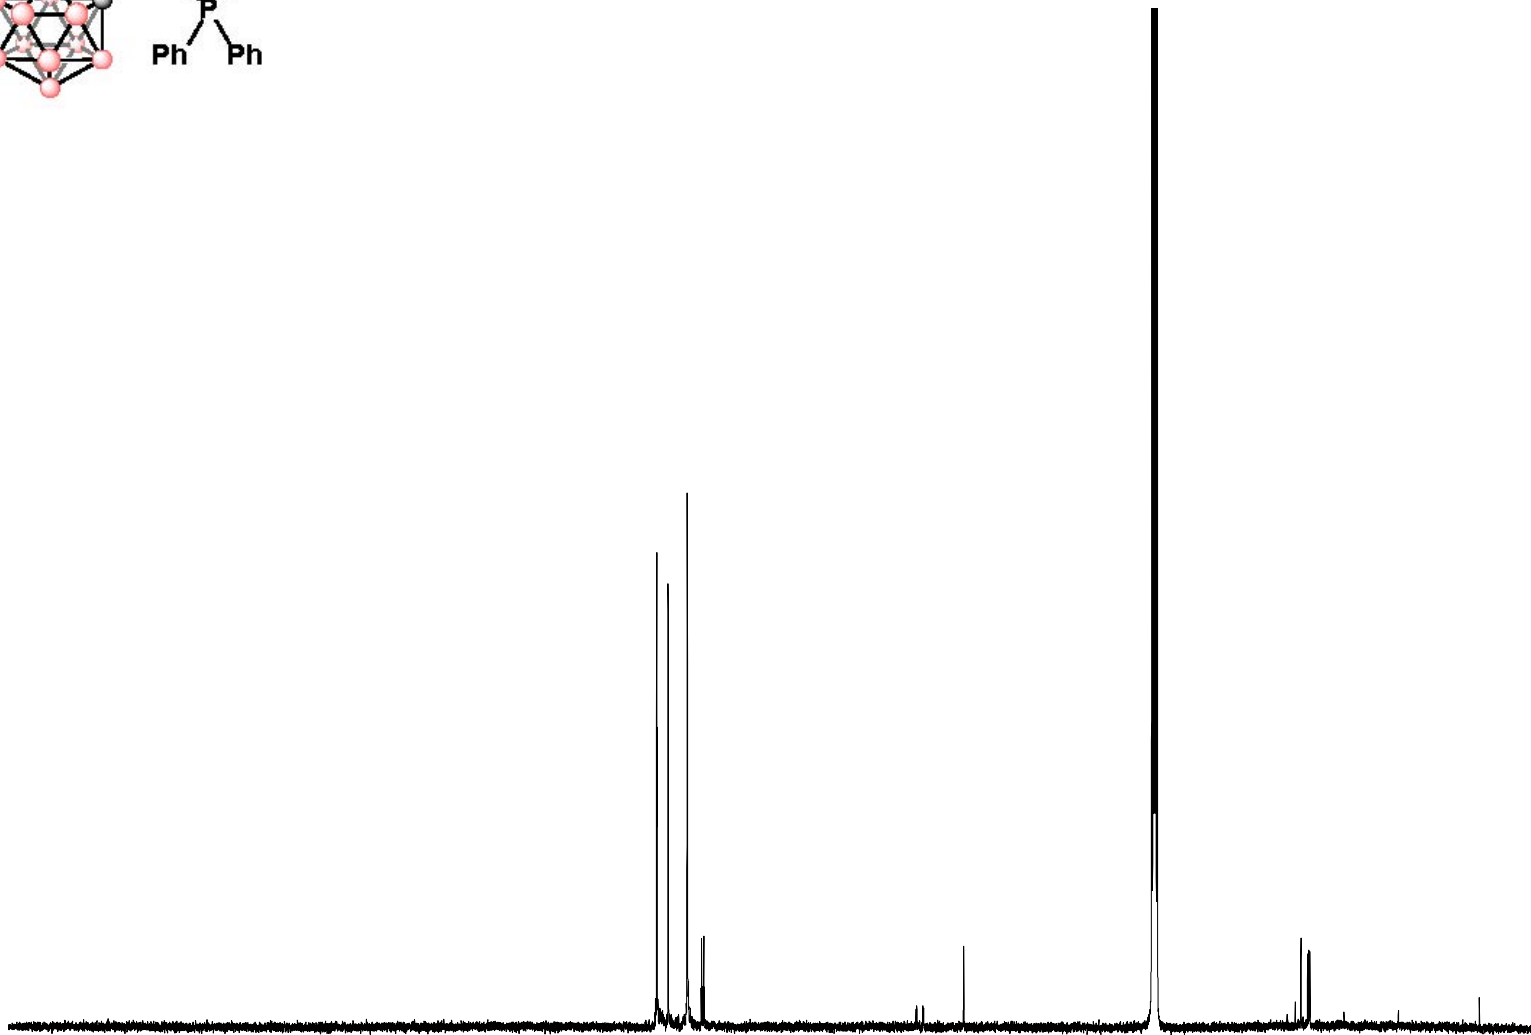

220 200 180 160 140 120 100 80 60 40 20 ppm



Current Data Parameters  
NAME kk-1-241 pd(bc) (dppe) pure  
EXPNO 22  
PROCNO 1

F2 - Acquisition Parameters  
Date\_ 20150920  
Time 19.56  
INSTRUM av500  
PROBHD 5 mm DCH 13C-1  
PULPROG zgpg30  
TD 65536  
SOLVENT CD2Cl2  
NS 1024  
DS 2  
SWH 31250.000 Hz  
FIDRES 0.476837 Hz  
AQ 1.0485760 sec  
RG 204.54  
DW 16.000 usec  
DE 18.00 usec  
TE 298.0 K  
D1 2.00000000 sec  
D11 0.03000000 sec  
TDO 1

===== CHANNEL f1 =====  
SFO1 125.7722511 MHz  
NUC1 13C  
P1 9.63 usec  
PLW1 23.00000000 W

===== CHANNEL f2 =====  
SFO2 500.1330008 MHz  
NUC2 1H  
CPDPRG[2] waltz16  
PCPD2 80.00 usec  
PLW2 13.50000000 W  
PLW12 0.21094000 W  
PLW13 0.13500001 W

F2 - Processing parameters  
SI 131072  
SF 125.7577377 MHz  
WDW EM  
SSB 0  
LB 1.00 Hz  
GB 0  
PC 1.40



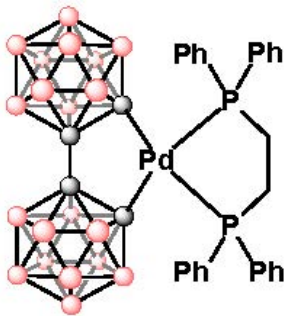

Current Data Parameters  
 NAME kk-1-241 pd(bc) (dppe) pure, 31p  
 EXPNO 1  
 PROCNO 1

F2 - Acquisition Parameters  
 Date\_ 20150920  
 Time 15.47  
 INSTRUM drx500  
 PROBHD 5 mm bb-Z Z800  
 PULPROG zgdc30  
 TD 131072  
 SOLVENT CD2Cl2  
 NS 128  
 DS 0  
 SWH 100000.000 Hz  
 FIDRES 0.762939 Hz  
 AQ 0.6553600 sec  
 RG 9195.2  
 DW 5.000 usec  
 DE 6.00 usec  
 TE 297.3 K  
 D1 2.00000000 sec  
 d11 0.03000000 sec  
 TDO 1

==== CHANNEL f1 =====  
 NUC1 31P  
 P1 9.00 usec  
 PL1 0 dB  
 SFO1 202.5370460 MHz

==== CHANNEL f2 =====  
 CPDPRG[2] waltz16  
 NUC2 1H  
 PCPD2 100.00 usec  
 PL2 0 dB  
 PL12 17.52 dB  
 SFO2 500.3320013 MHz

F2 - Processing parameters  
 SI 131072  
 SF 202.5371980 MHz  
 WDW EM  
 SSB 0  
 LB 1.00 Hz  
 GB 0  
 PC 1.40

51.63

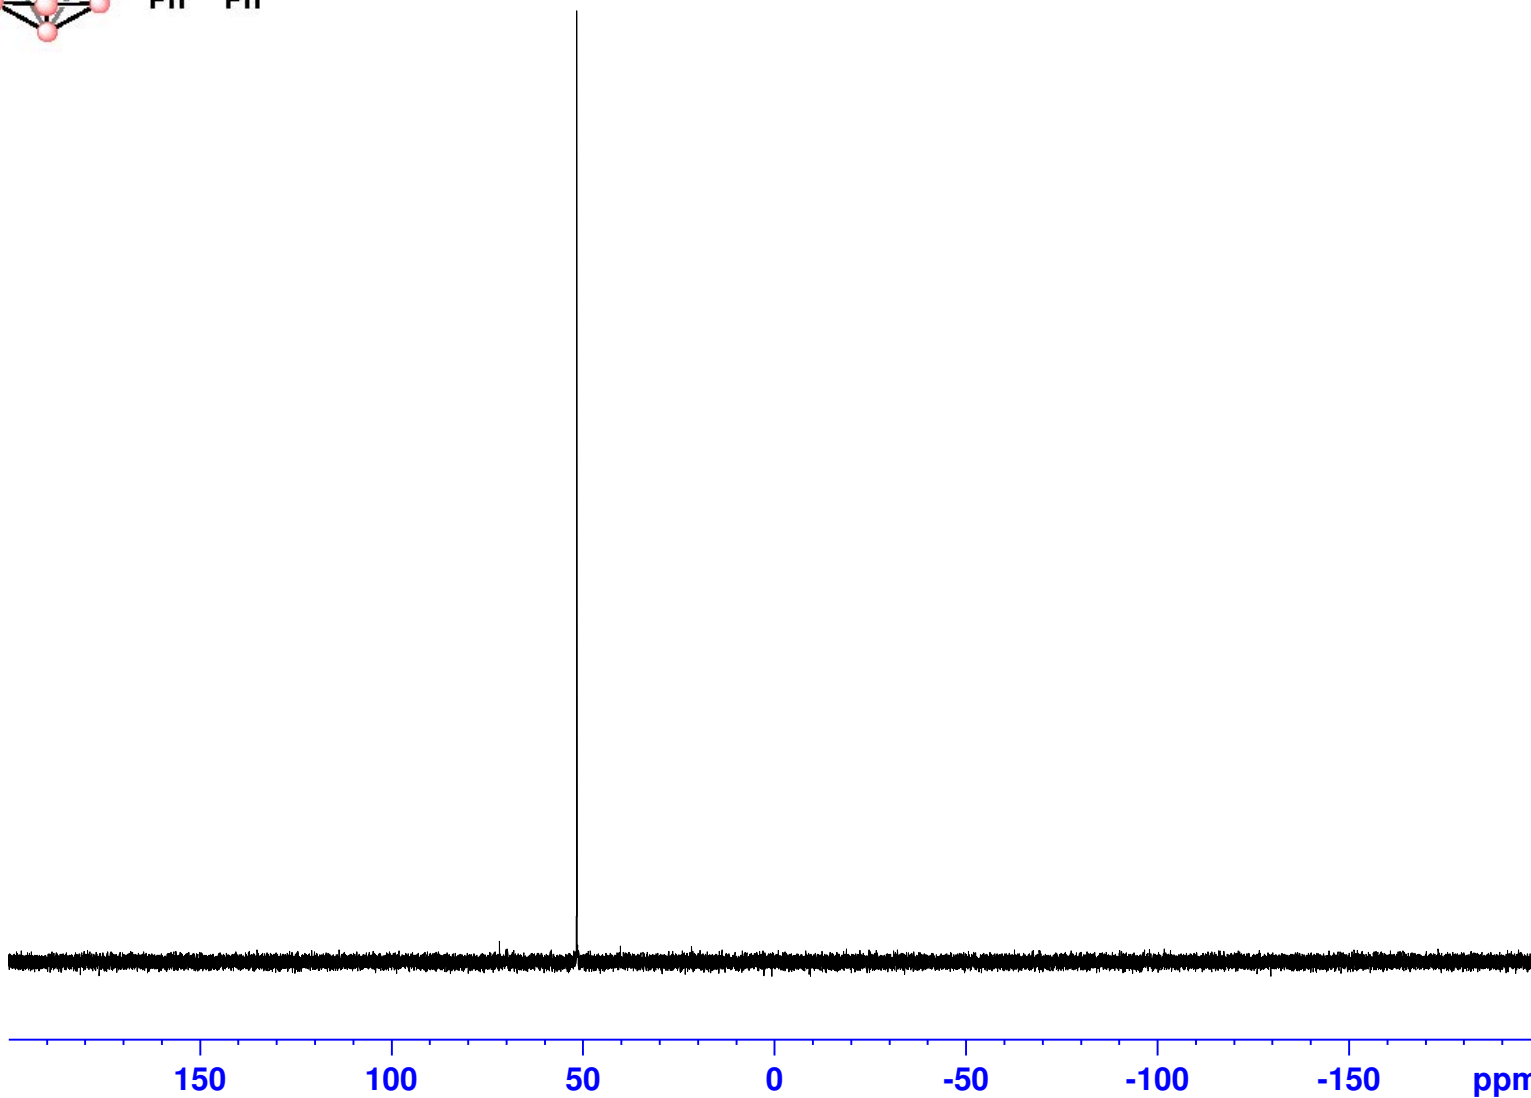

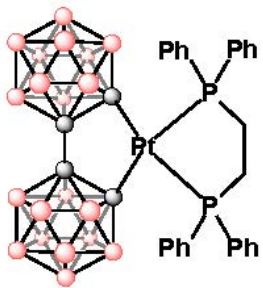

7.70  
7.70  
7.69  
7.67  
7.63  
7.63  
7.57  
7.56  
7.55  
7.55

2.09  
2.05

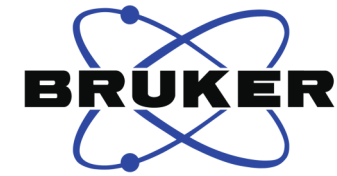

Current Data Parameters  
 NAME KK-1-285 Pt(bc) (dppe)  
 EXPNO 10  
 PROCNO 1

F2 - Acquisition Parameters  
 Date\_ 20151221  
 Time 18.41  
 INSTRUM av500  
 PROBHD 5 mm DCH 13C-1  
 PULPROG zg30  
 TD 65536  
 SOLVENT CD2C12  
 NS 64  
 DS 0  
 SWH 10000.000 Hz  
 FIDRES 0.152588 Hz  
 AQ 3.2767999 sec  
 RG 12.14  
 DW 50.000 usec  
 DE 10.00 usec  
 TE 298.0 K  
 D1 2.00000000 sec  
 TD0 1

==== CHANNEL f1 =====  
 SFO1 500.1330008 MHz  
 NUC1 1H  
 P1 10.00 usec  
 PLW1 13.50000000 W

F2 - Processing parameters  
 SI 65536  
 SF 500.1300194 MHz  
 WDW EM  
 SSB 0  
 LB 0.30 Hz  
 GB 0  
 PC 1.00

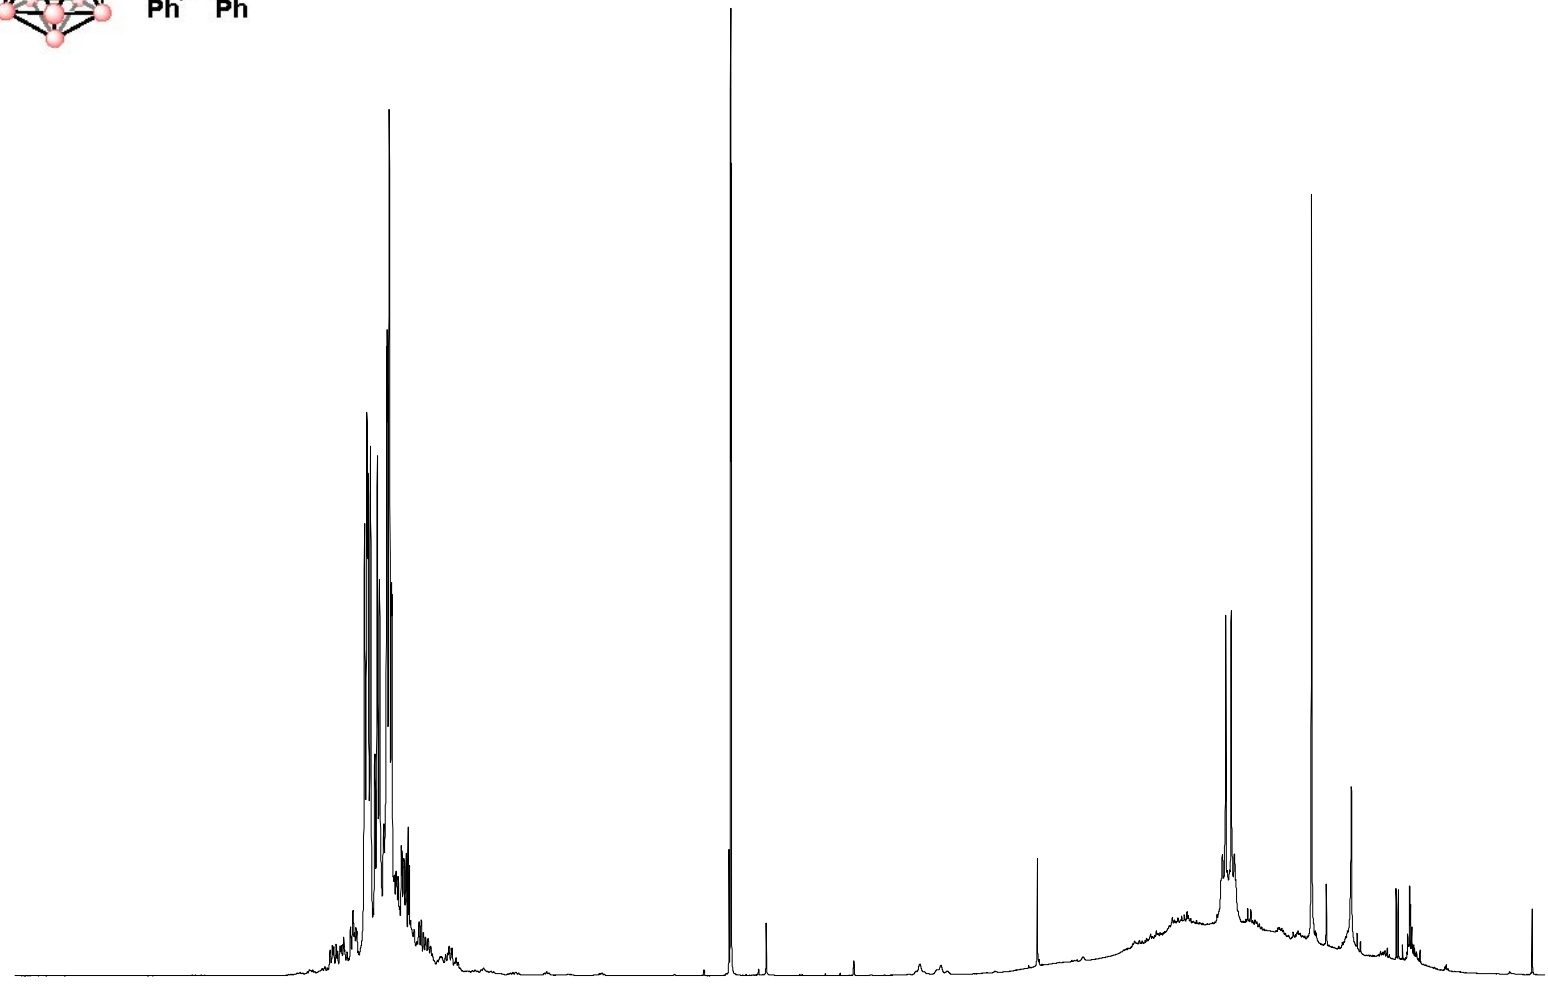

9 8 7 6 5 4 3 2 1 ppm

6.80  
4.08  
8.00

33.60  
4.22

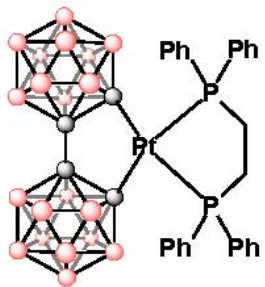

-3.67  
-8.08  
-8.85



Current Data Parameters  
 NAME KK-1-285 Pt(bc) (dppe) pure 11B  
 EXPNO 3  
 PROCNO 1

F2 - Acquisition Parameters  
 Date\_ 20151221  
 Time 18.29  
 INSTRUM drx500  
 PROBHD 5 mm bb-Z Z800  
 PULPROG zgdc  
 TD 7168  
 SOLVENT CD2Cl2  
 NS 4096  
 DS 4  
 SWH 64102.562 Hz  
 FIDRES 8.942880 Hz  
 AQ 0.0559104 sec  
 RG 406.4  
 DW 7.800 usec  
 DE 6.00 usec  
 TE 296.7 K  
 D1 0.00000400 sec  
 d11 0.03000000 sec  
 TDO 1

===== CHANNEL f1 =====  
 NUC1 11B  
 P1 8.00 usec  
 PL1 -2.00 dB  
 SFO1 160.5257140 MHz

===== CHANNEL f2 =====  
 CPDPRG[2] waltz16  
 NUC2 off  
 PCPD2 100.00 usec  
 PL2 0 dB  
 PL12 17.52 dB  
 SFO2 500.3300000 MHz

F2 - Processing parameters  
 SI 32768  
 SF 160.5257957 MHz  
 WDW EM  
 SSB 0  
 LB 10.00 Hz  
 GB 0  
 PC 1.40

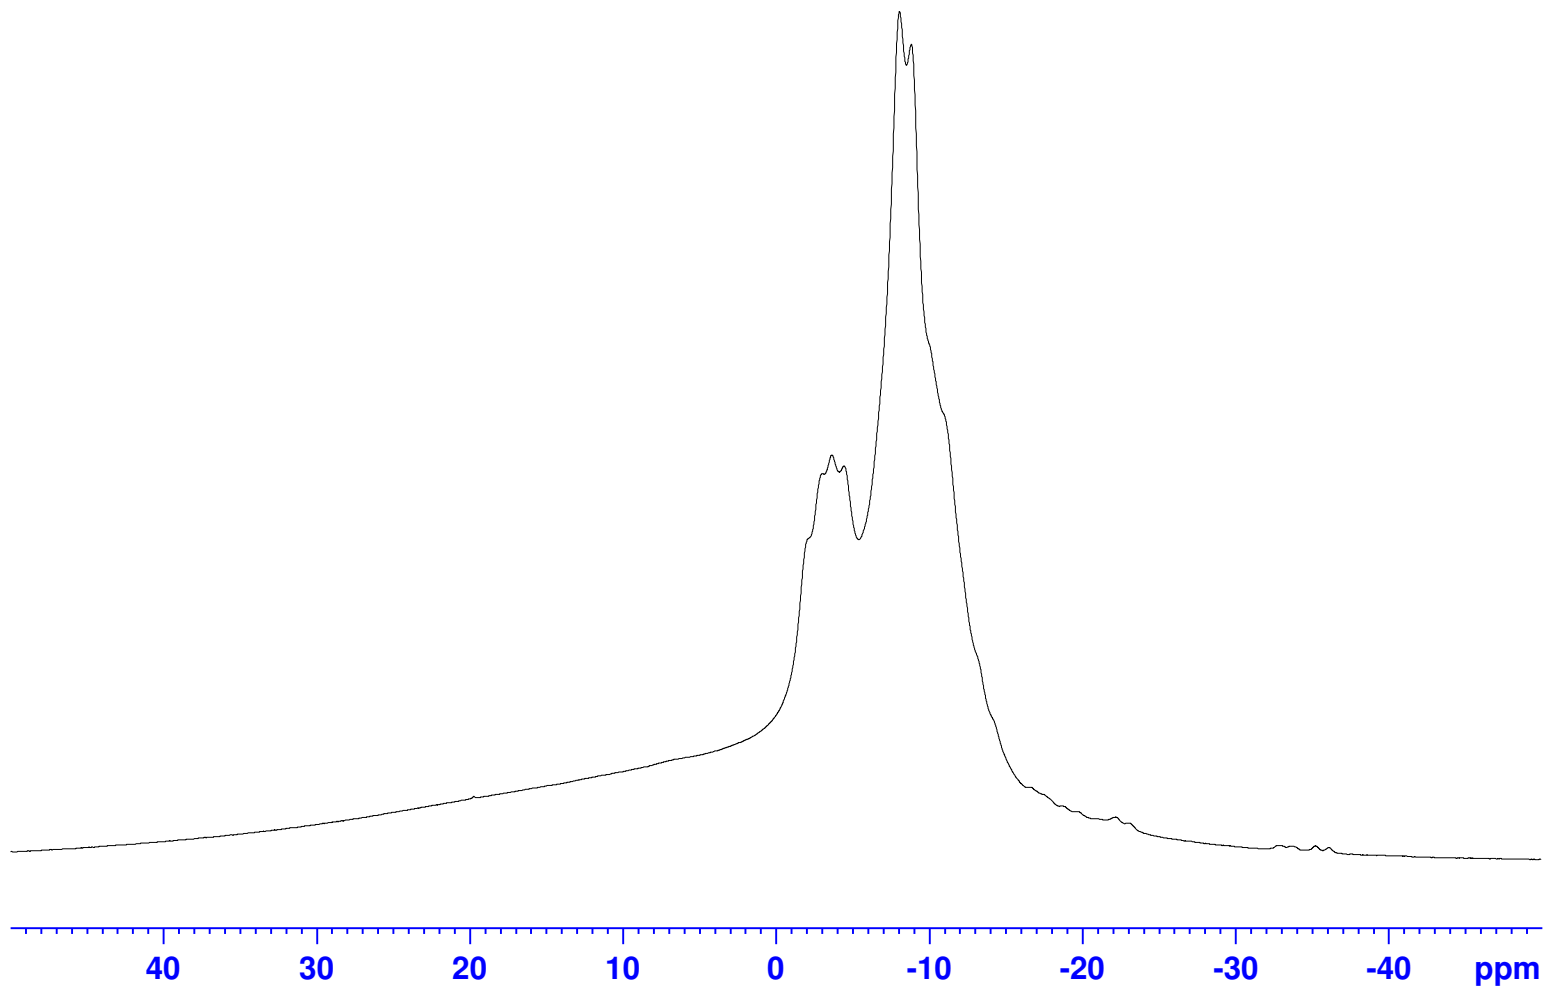

4.00  
15.30

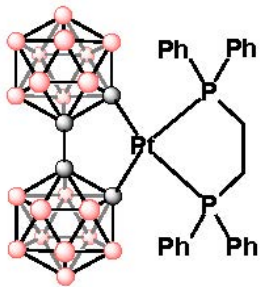

-2.44  
 -4.08  
 -8.46  
 -10.65

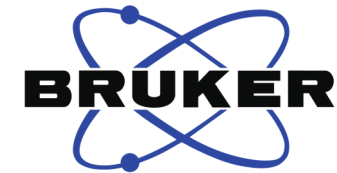

Current Data Parameters  
 NAME KK-1-285 Pt(bc) (dppe) pure 11B  
 EXPNO 2  
 PROCNO 1

F2 - Acquisition Parameters  
 Date\_ 20151221  
 Time 18.21  
 INSTRUM drx500  
 PROBHD 5 mm bb-Z Z800  
 PULPROG zgdc  
 TD 7168  
 SOLVENT CD2Cl2  
 NS 4096  
 DS 4  
 SWH 64102.562 Hz  
 FIDRES 8.942880 Hz  
 AQ 0.0559104 sec  
 RG 406.4  
 DW 7.800 usec  
 DE 6.00 usec  
 TE 297.0 K  
 D1 0.00000400 sec  
 d11 0.03000000 sec  
 TD0 1

===== CHANNEL f1 =====  
 NUC1 11B  
 P1 8.00 usec  
 PL1 -2.00 dB  
 SFO1 160.5257136 MHz

===== CHANNEL f2 =====  
 CPDPRG[2] waltz16  
 NUC2 1H  
 PCPD2 100.00 usec  
 PL2 0 dB  
 PL12 17.52 dB  
 SFO2 500.3330020 MHz

F2 - Processing parameters  
 SI 32768  
 SF 160.5257957 MHz  
 WDW EM  
 SSB 0  
 LB 10.00 Hz  
 GB 0  
 PC 1.40

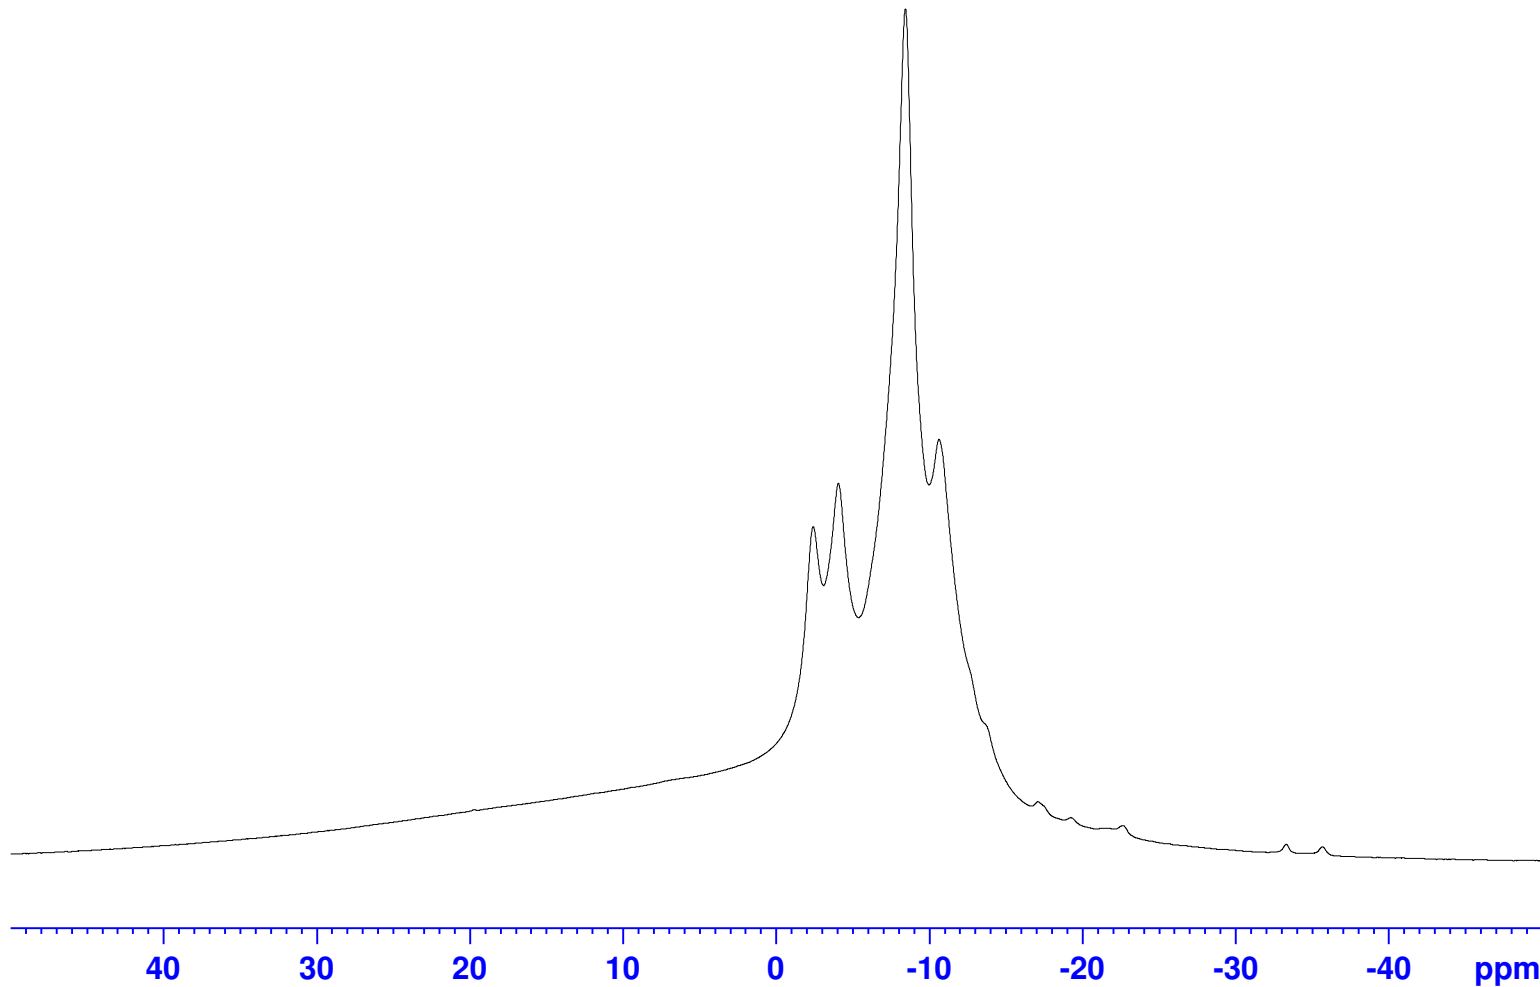

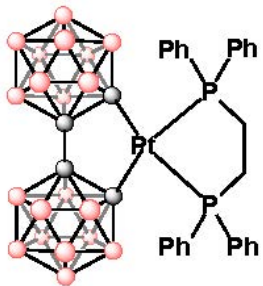

134.79  
134.75  
134.70  
132.69  
129.52  
129.48  
129.43  
126.98  
126.54

89.66  
89.60  
88.64  
88.57  
84.57

29.88  
29.83

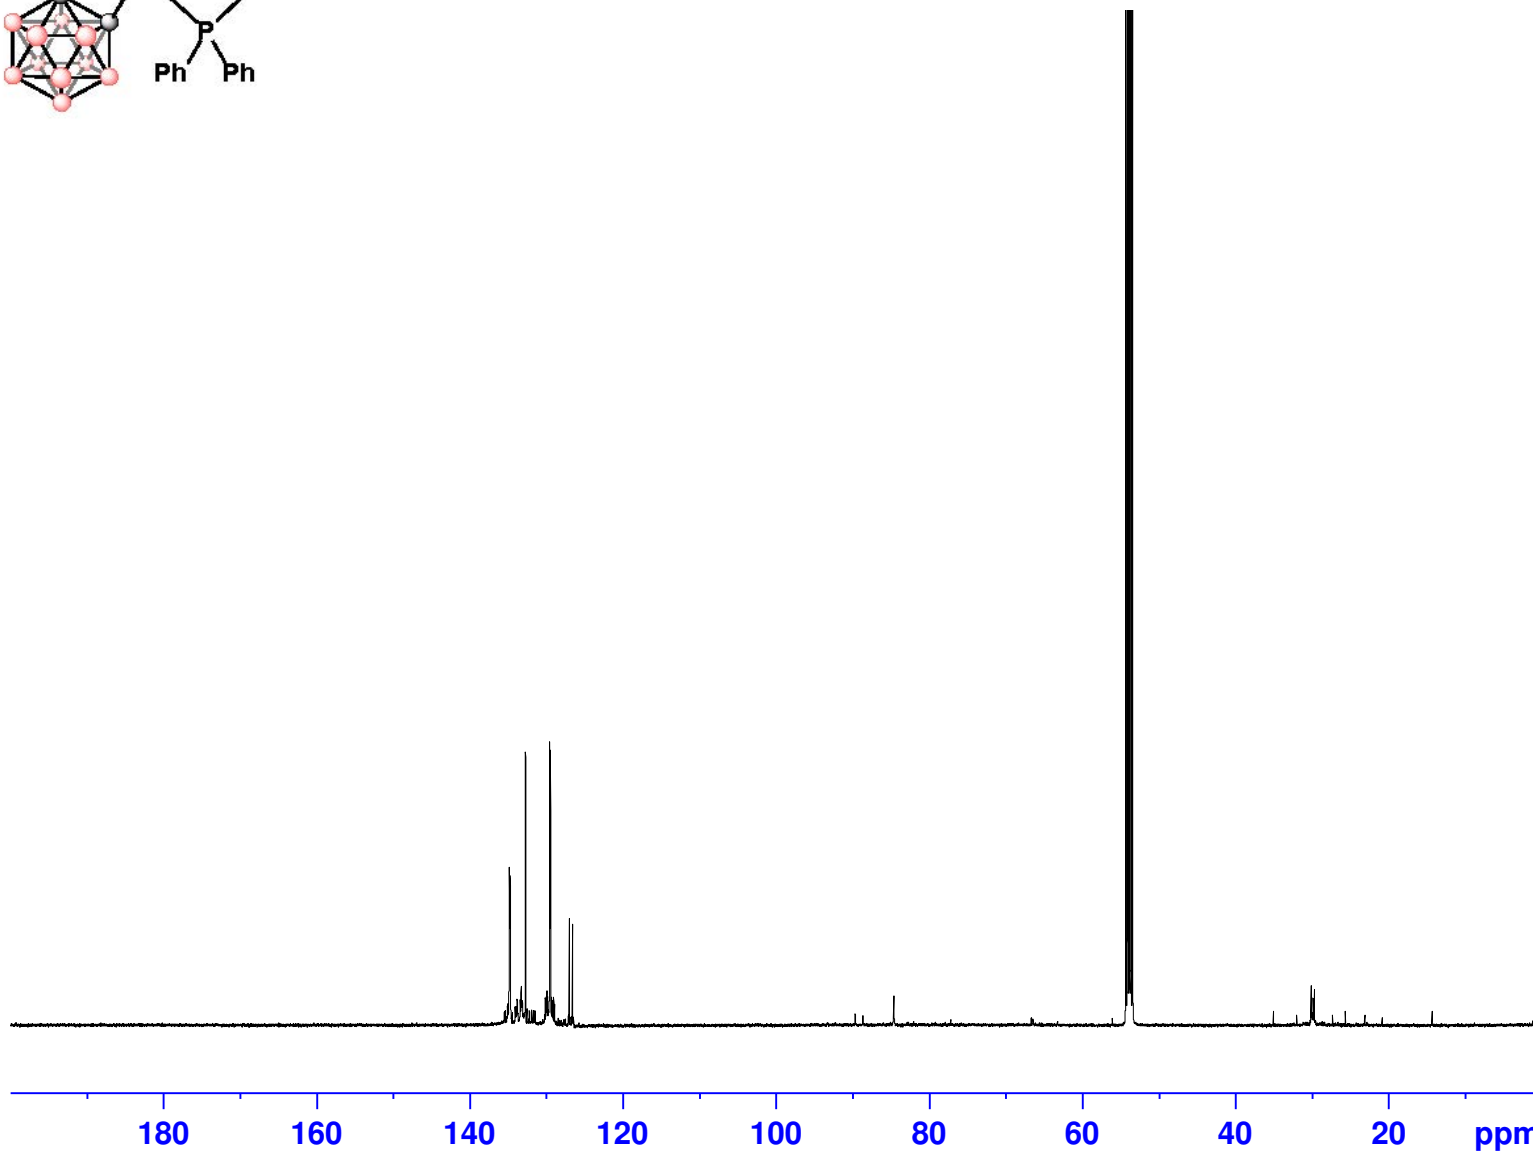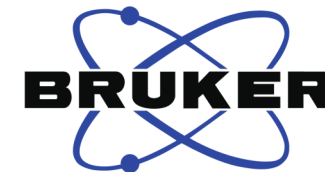

Current Data Parameters  
NAME KK-1-285 Pt(bc) (dppe)  
EXPNO 11  
PROCNO 1

F2 - Acquisition Parameters  
Date\_ 20151221  
Time 19.37  
INSTRUM av500  
PROBHD 5 mm DCH 13C-1  
PULPROG zgpg30  
TD 65536  
SOLVENT CD2Cl2  
NS 1024  
DS 2  
SWH 31250.000 Hz  
FIDRES 0.476837 Hz  
AQ 1.0485760 sec  
RG 204.54  
DW 16.000 usec  
DE 18.00 usec  
TE 298.0 K  
D1 2.00000000 sec  
D11 0.03000000 sec  
TD0 1

==== CHANNEL f1 =====  
SFO1 125.7722511 MHz  
NUC1 13C  
P1 9.63 usec  
PLW1 23.00000000 W

==== CHANNEL f2 =====  
SFO2 500.1330008 MHz  
NUC2 1H  
CPDPRG[2] waltz16  
PCPD2 80.00 usec  
PLW2 13.50000000 W  
PLW12 0.21094000 W  
PLW13 0.13500001 W

F2 - Processing parameters  
SI 131072  
SF 125.7577387 MHz  
WDW EM  
SSB 0  
LB 1.00 Hz  
GB 0  
PC 1.40

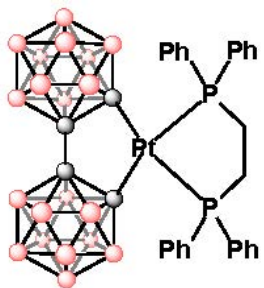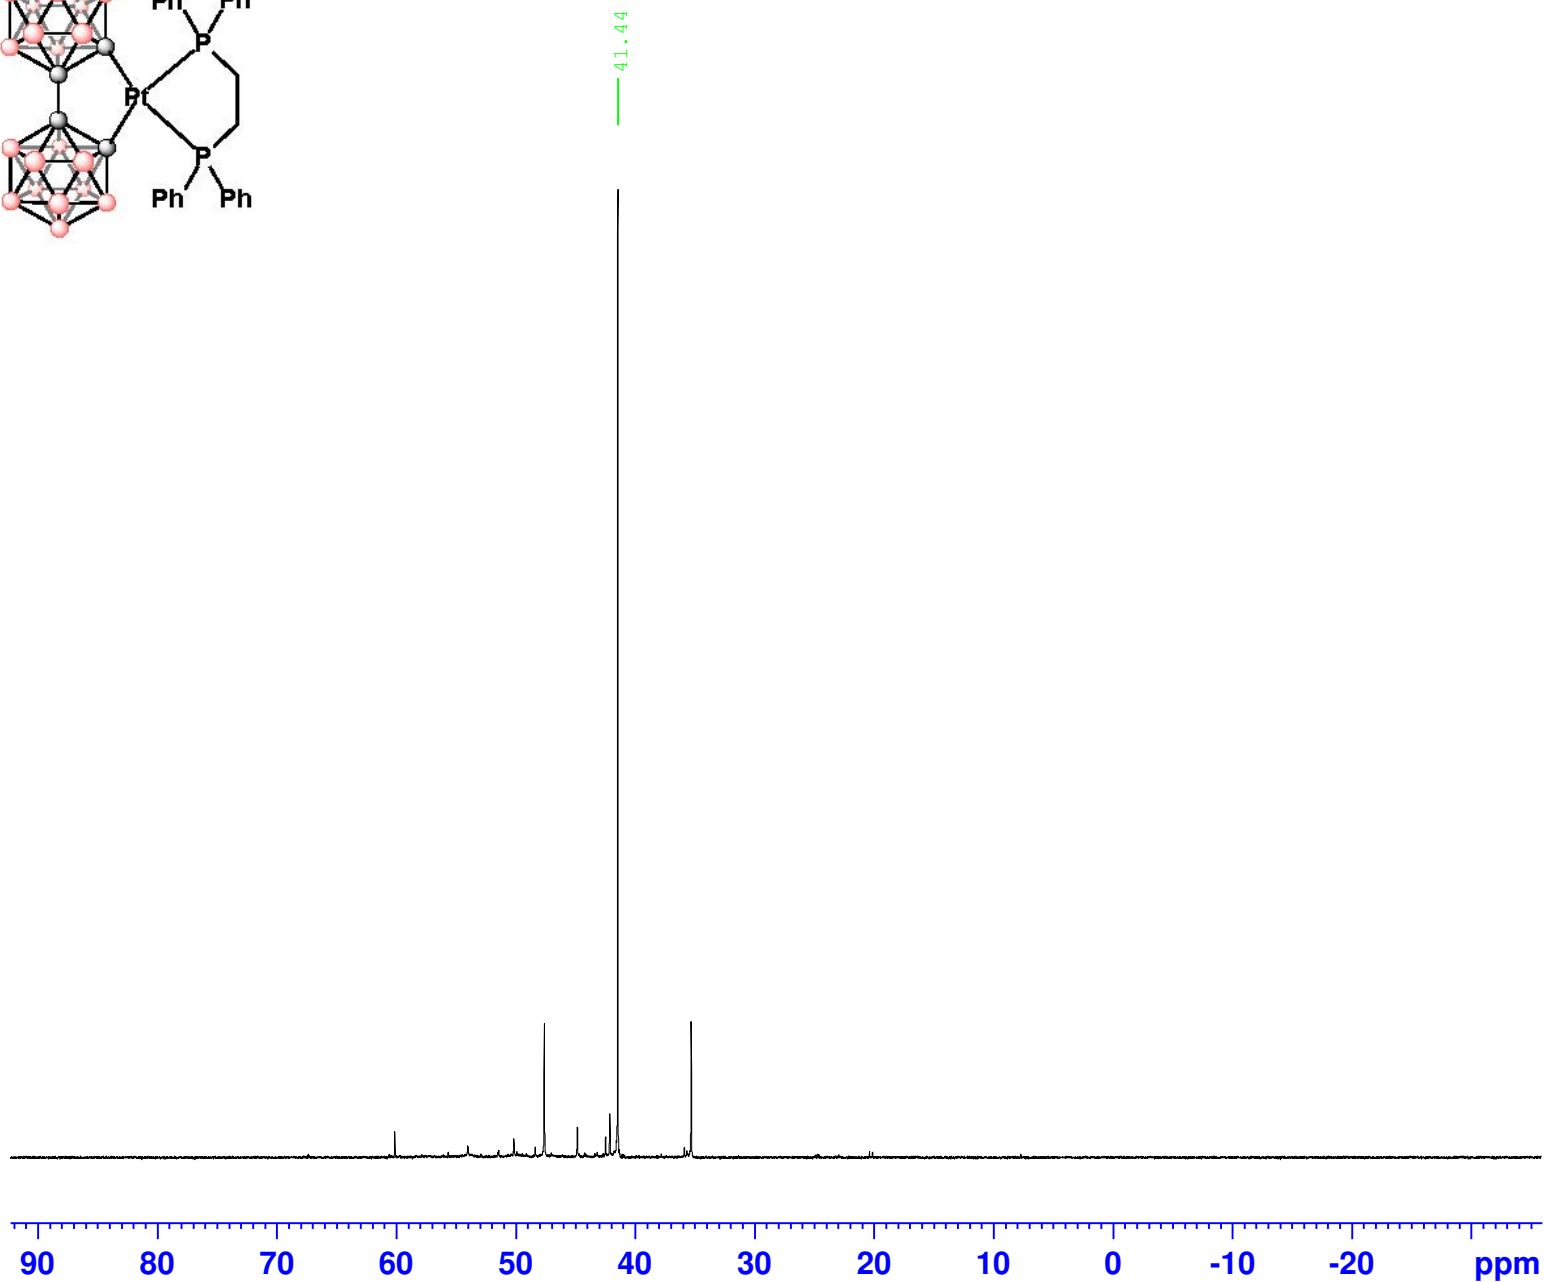

Current Data Parameters  
 NAME KK-1-285 Pt(bc) (dppe) pure 31P  
 EXPNO 2  
 PROCNO 1

F2 - Acquisition Parameters  
 Date\_ 20151221  
 Time 17.09  
 INSTRUM drx500  
 PROBHD 5 mm bb-Z Z800  
 PULPROG zgdc30  
 TD 131072  
 SOLVENT CD2C12  
 NS 1024  
 DS 0  
 SWH 100000.000 Hz  
 FIDRES 0.762939 Hz  
 AQ 0.6553600 sec  
 RG 13004  
 DW 5.000 usec  
 DE 6.00 usec  
 TE 297.1 K  
 D1 2.00000000 sec  
 d11 0.03000000 sec  
 TD0 1

===== CHANNEL f1 =====  
 NUC1 31P  
 P1 9.00 usec  
 PL1 0 dB  
 SFO1 202.5370460 MHz

===== CHANNEL f2 =====  
 CPDPRG[2] waltz16  
 NUC2 1H  
 PCPD2 100.00 usec  
 PL2 0 dB  
 PL12 17.52 dB  
 SFO2 500.3320013 MHz

F2 - Processing parameters  
 SI 131072  
 SF 202.5371730 MHz  
 WDW EM  
 SSB 0  
 LB 1.00 Hz  
 GB 0  
 PC 1.40



Current Data Parameters  
NAME Sep25-2015-spokoyny  
EXPNO 40  
PROCNO 1

F2 - Acquisition Parameters

Date\_ 20150925  
Time 14.39  
INSTRUM av400  
PROBHD 5 mm PABBO BB/  
PULPROG zg30  
TD 52882  
SOLVENT THF  
NS 64  
DS 0  
SWH 8012.820 Hz  
FIDRES 0.151523 Hz  
AQ 3.2998369 sec  
RG 155.85  
DW 62.400 usec  
DE 6.50 usec  
TE 299.0 K  
D1 2.00000000 sec  
TD0 1

==== CHANNEL f1 =====  
SFO1 400.132408 MHz  
NUC1 1H  
P1 15.00 usec  
PLW1 13.00000000 W

F2 - Processing parameters

SI 65536  
SF 400.1300176 MHz  
WDW EM  
SSB 0  
LB 0.30 Hz  
GB 0  
PC 1.00

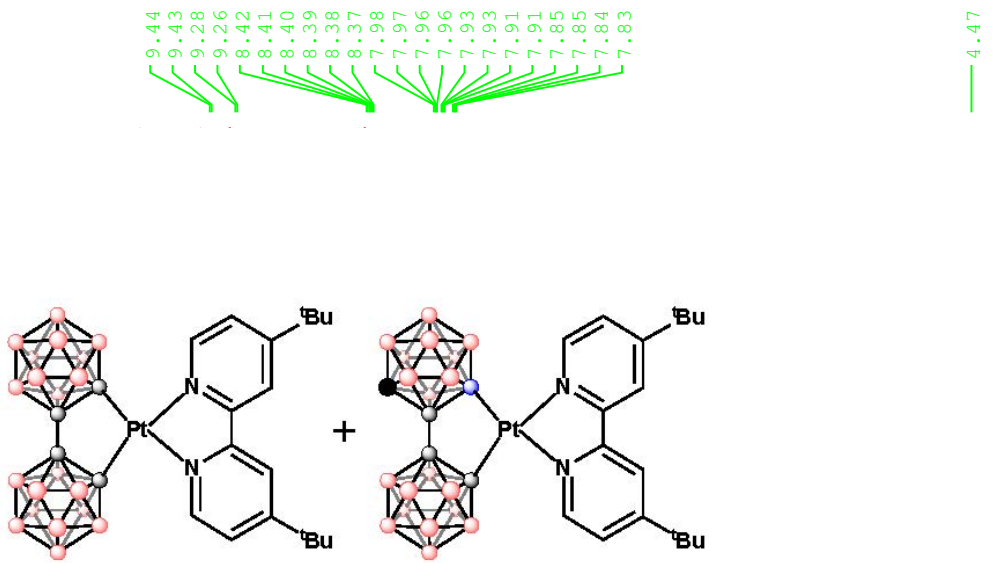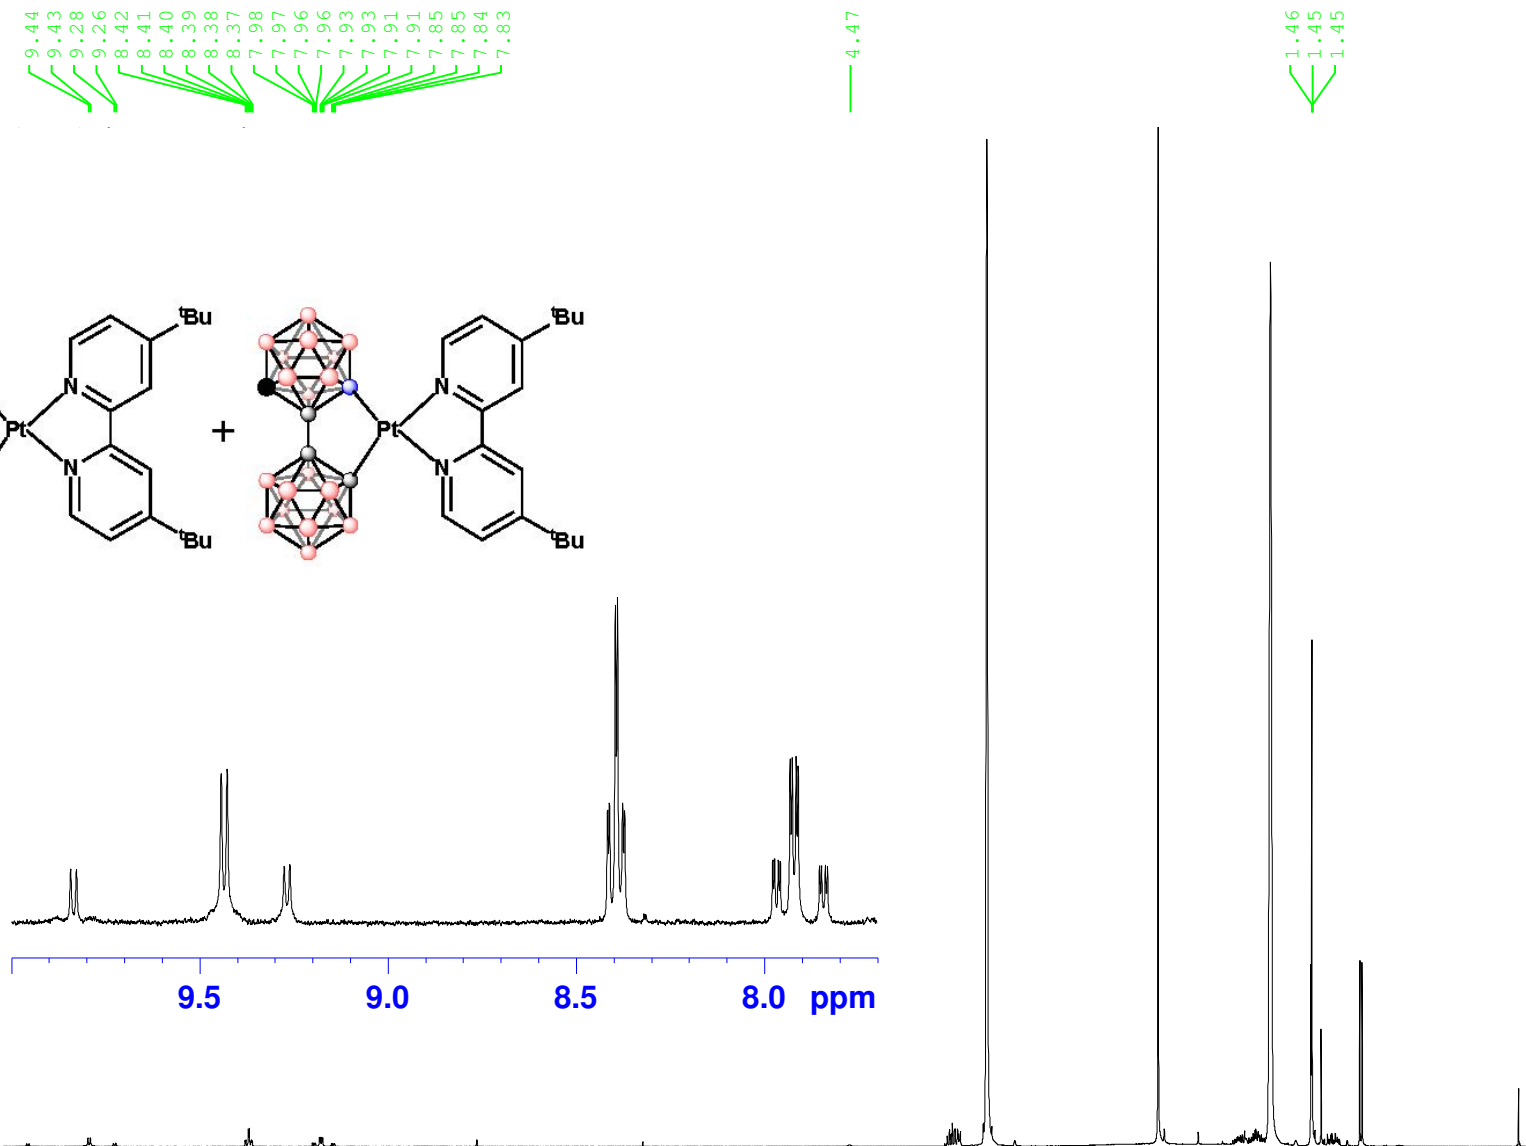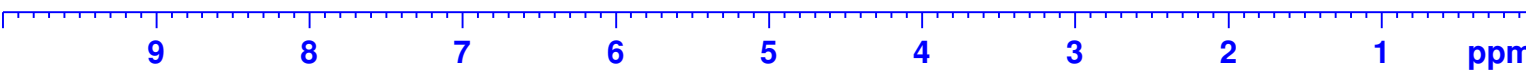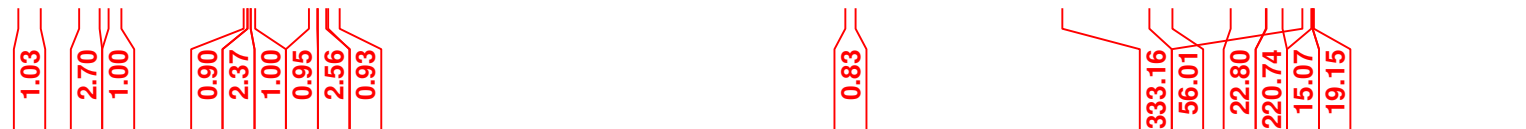

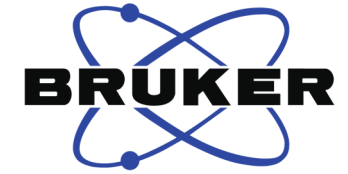

Current Data Parameters  
NAME KK-1-297 Pt(bc) (dtb-bpy)  
EXPNO 10  
PROCNO 1

F2 - Acquisition Parameters  
Date\_ 20160127  
Time 1.10  
INSTRUM av500  
PROBHD 5 mm DCH 13C-1  
PULPROG zg30  
TD 65536  
SOLVENT THF  
NS 128  
DS 0  
SWH 10000.000 Hz  
FIDRES 0.152588 Hz  
AQ 3.2767999 sec  
RG 23.34  
DW 50.000 usec  
DE 10.00 usec  
TE 298.0 K  
D1 2.00000000 sec  
TD0 1

==== CHANNEL f1 =====  
SF01 500.1330008 MHz  
NUC1 1H  
P1 10.00 usec  
PLW1 13.50000000 W

F2 - Processing parameters  
SI 65536  
SF 500.1290892 MHz  
WDW EM  
SSB 0  
LB 0.30 Hz  
GB 0  
PC 1.00

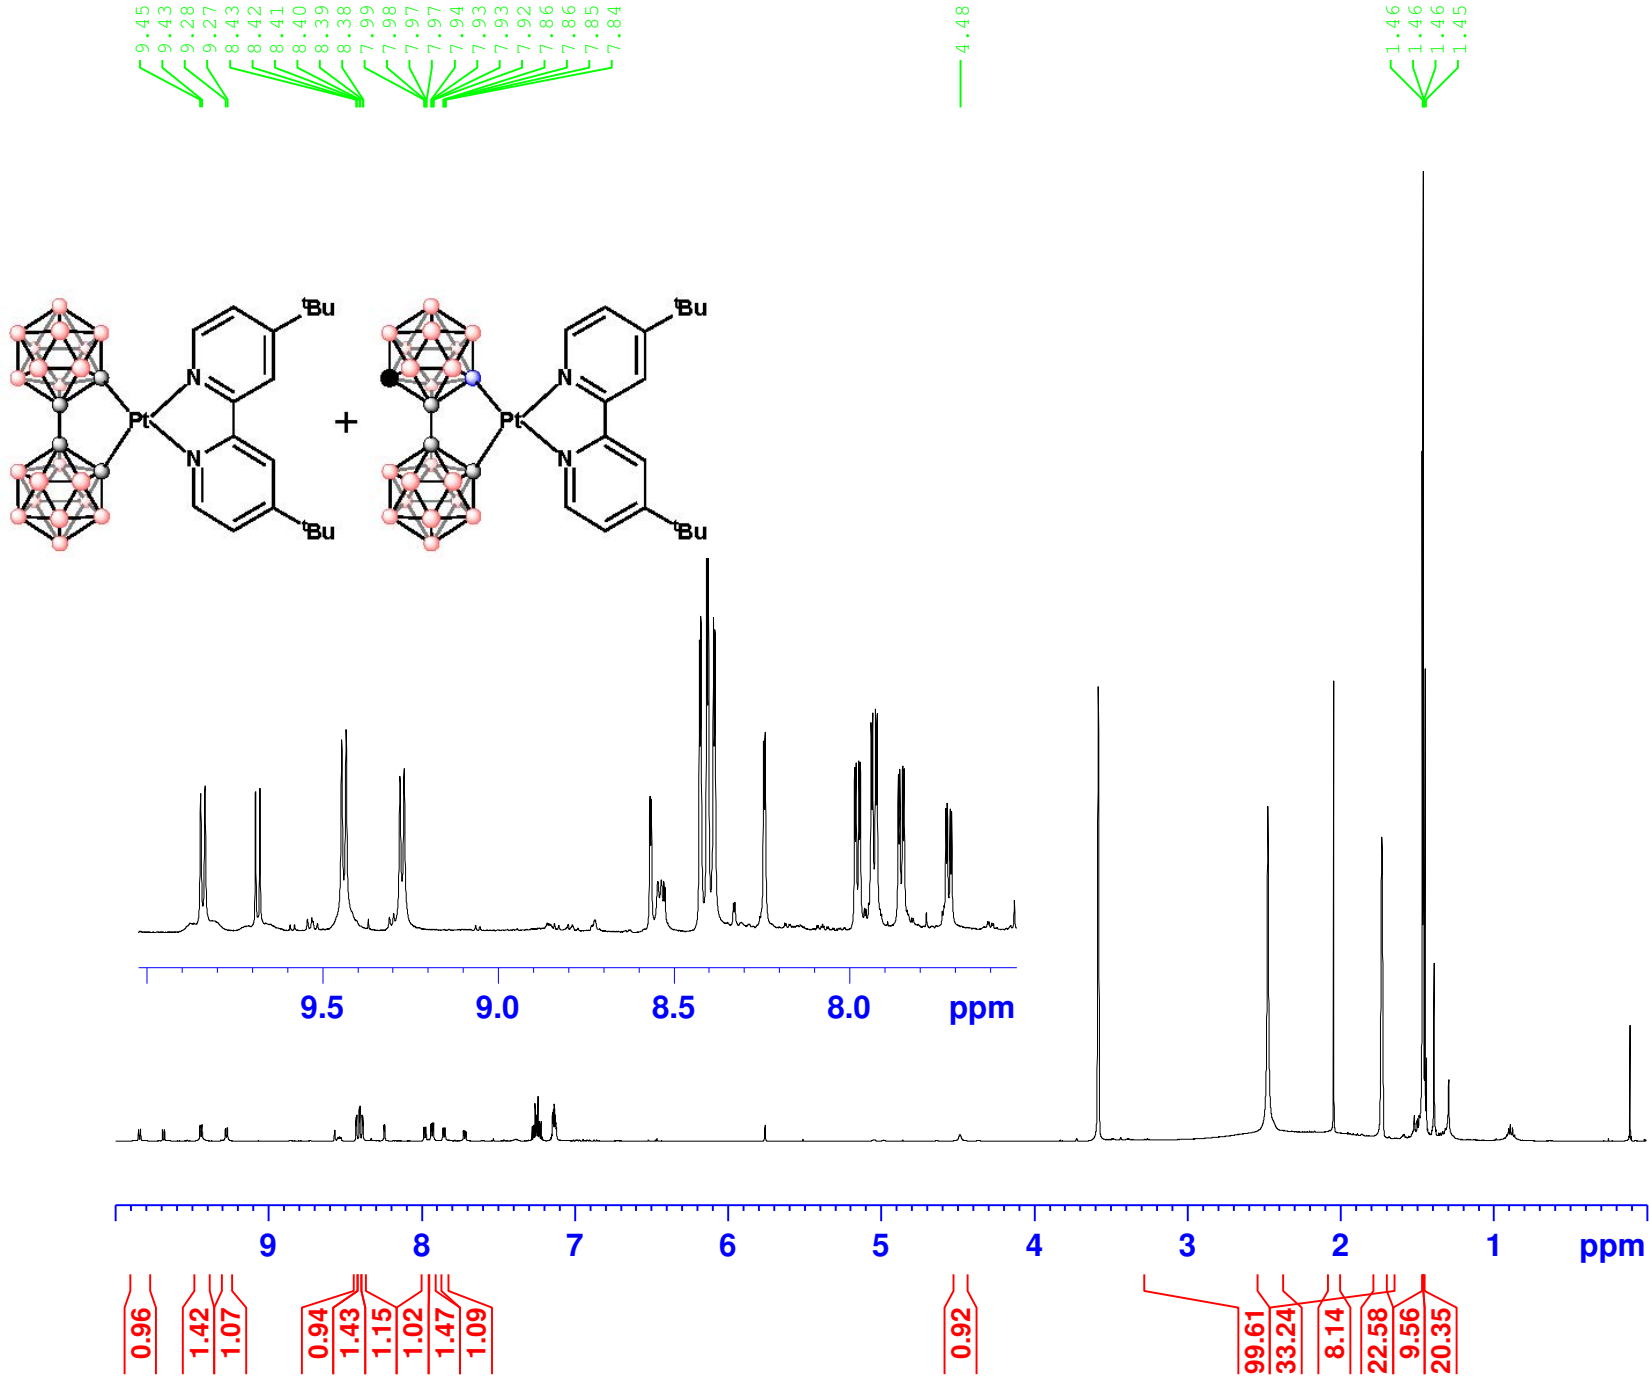



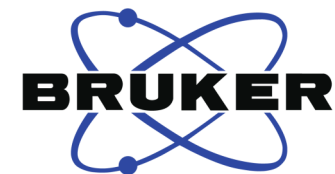

Current Data Parameters  
NAME KK-1-297 Pt(bc) (dtb-bpy) 11B  
EXPNO 2  
PROCNO 1

F2 - Acquisition Parameters  
Date\_ 20160129  
Time 12.58  
INSTRUM drx500  
PROBHD 5 mm bb-Z Z800  
PULPROG zgdc  
TD 7168  
SOLVENT THF  
NS 8192  
DS 4  
SWH 64102.562 Hz  
FIDRES 8.942880 Hz  
AQ 0.0559104 sec  
RG 574.7  
DW 7.800 usec  
DE 6.00 usec  
TE 296.7 K  
D1 0.00000400 sec  
d11 0.03000000 sec  
TD0 1

===== CHANNEL f1 =====  
NUC1 11B  
P1 8.00 usec  
PL1 -2.00 dB  
SFO1 160.5257140 MHz

===== CHANNEL f2 =====  
CPDPRG[2] waltz16  
NUC2 off  
PCPD2 100.00 usec  
PL2 0 dB  
PL12 17.52 dB  
SFO2 500.3300000 MHz

F2 - Processing parameters  
SI 32768  
SF 160.5257546 MHz  
WDW EM  
SSB 0  
LB 10.00 Hz  
GB 0  
PC 1.40

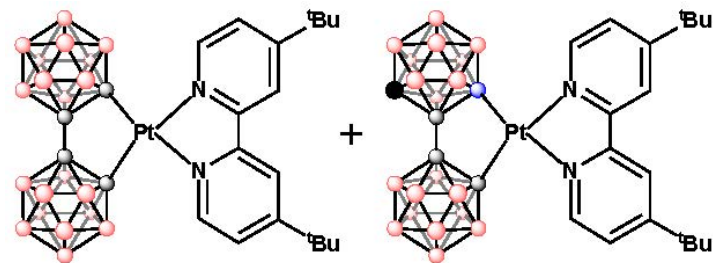

-4.23  
-8.91

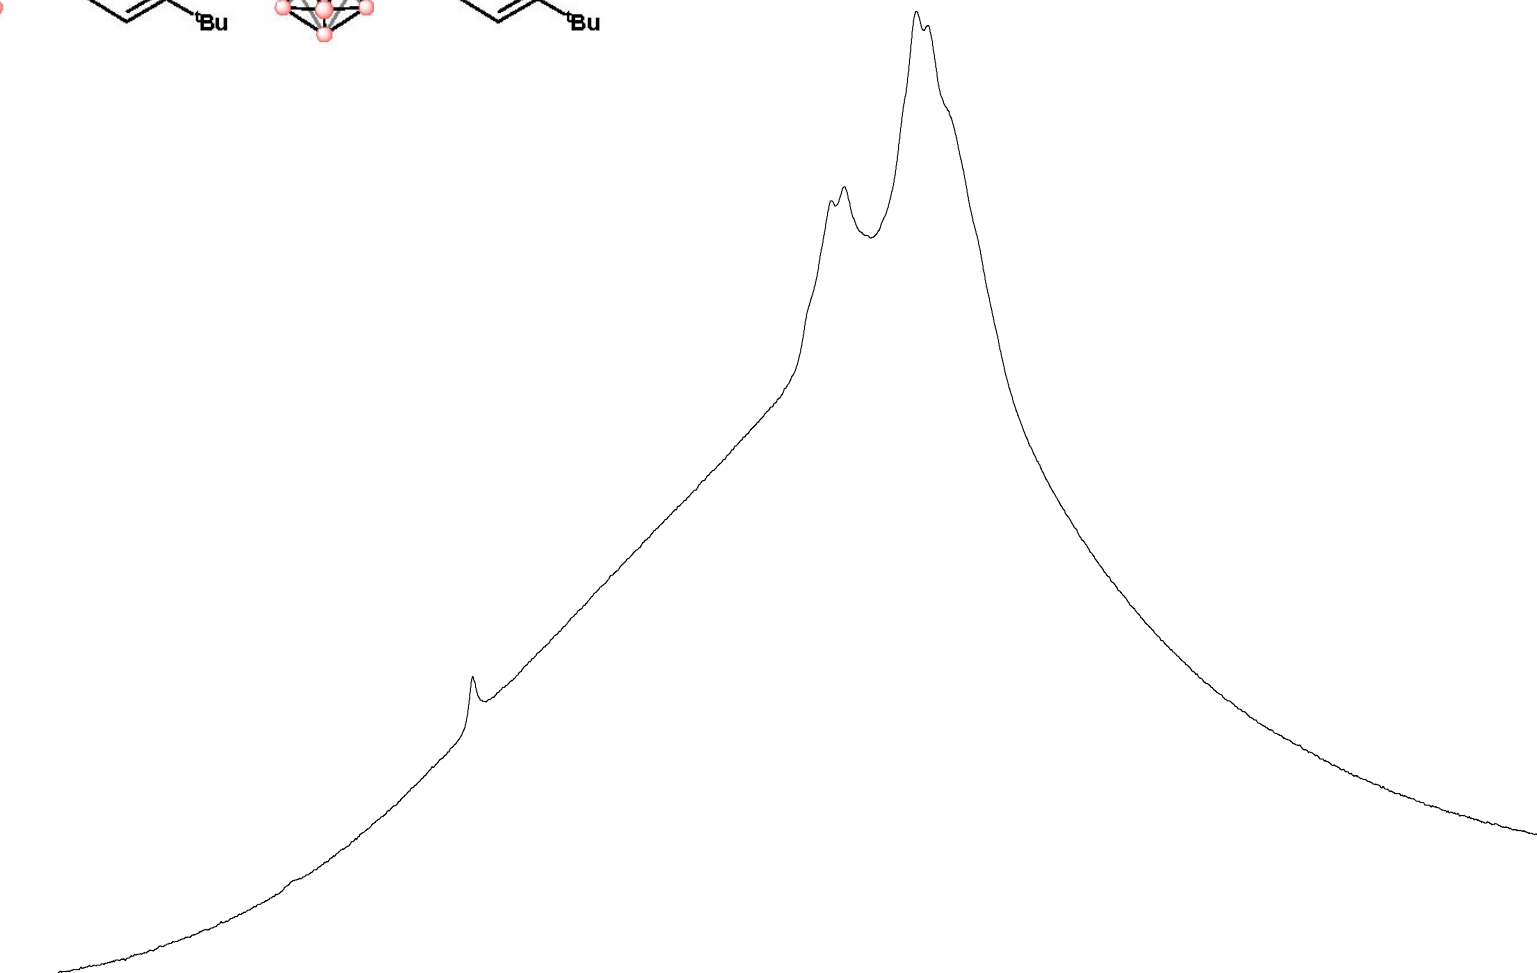

40 30 20 10 0 -10 -20 -30 -40 ppm

5.94  
14.06

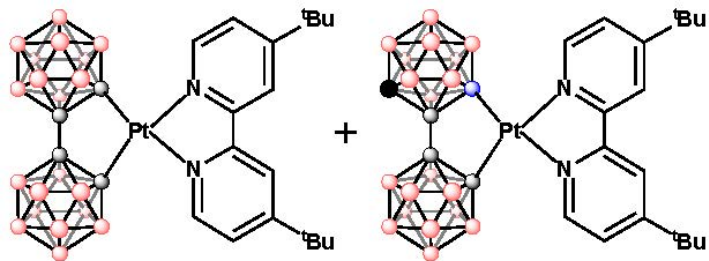

-3.80  
-9.18

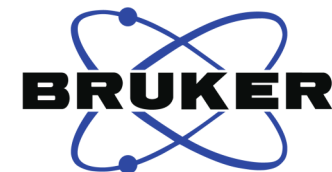

Current Data Parameters  
 NAME KK-1-297 Pt(bc) (dtb-bpy) 11B  
 EXPNO 1  
 PROCNO 1

F2 - Acquisition Parameters  
 Date\_ 20160129  
 Time 12.41  
 INSTRUM drx500  
 PROBHD 5 mm bb-Z Z800  
 PULPROG zgdc  
 TD 7168  
 SOLVENT THF  
 NS 8192  
 DS 4  
 SWH 64102.562 Hz  
 FIDRES 8.942880 Hz  
 AQ 0.0559104 sec  
 RG 574.7  
 DW 7.800 usec  
 DE 6.00 usec  
 TE 297.1 K  
 D1 0.00000400 sec  
 d11 0.03000000 sec  
 TD0 1

===== CHANNEL f1 =====  
 NUC1 11B  
 P1 8.00 usec  
 PL1 -2.00 dB  
 SFO1 160.5257140 MHz

===== CHANNEL f2 =====  
 CPDPRG[2] waltz16  
 NUC2 1H  
 PCPD2 100.00 usec  
 PL2 0 dB  
 PL12 17.52 dB  
 SFO2 500.3330020 MHz

F2 - Processing parameters  
 SI 32768  
 SF 160.5257546 MHz  
 WDW EM  
 SSB 0  
 LB 10.00 Hz  
 GB 0  
 PC 1.40

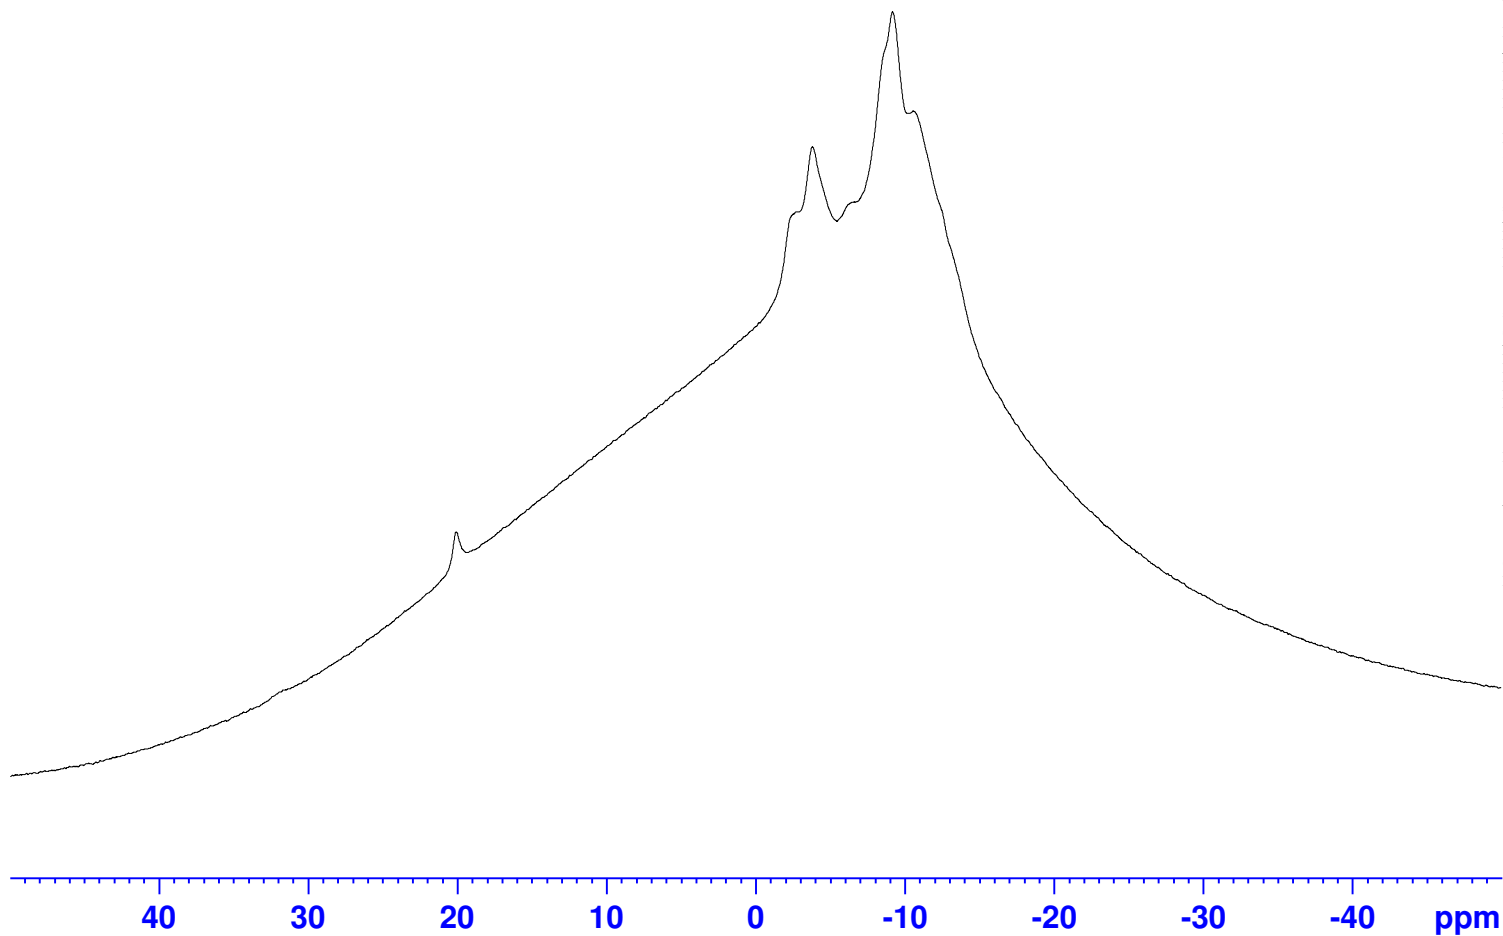



Current Data Parameters  
NAME KK-1-297 Pt(bc) (dtb-bpy)  
EXPNO 11  
PROCNO 1

F2 - Acquisition Parameters  
Date\_ 20160127  
Time\_ 2.06  
INSTRUM av500  
PROBHD 5 mm DCH 13C-1  
PULPROG zgpg30  
TD 65536  
SOLVENT THF  
NS 1024  
DS 2  
SWH 31250.000 Hz  
FIDRES 0.476837 Hz  
AQ 1.0485760 sec  
RG 204.54  
DW 16.000 usec  
DE 18.00 usec  
TE 298.0 K  
D1 2.00000000 sec  
D11 0.03000000 sec  
TD0 1

=====  
CHANNEL f1  
SFO1 125.7722511 MHz  
NUC1 13C  
P1 9.63 usec  
PLW1 23.00000000 W

=====  
CHANNEL f2  
SFO2 500.1330008 MHz  
NUC2 1H  
CPDPRG[2] waltz16  
PCPD2 80.00 usec  
PLW2 13.50000000 W  
PLW12 0.21094000 W  
PLW13 0.13500001 W

F2 - Processing parameters  
SI 131072  
SF 125.7574332 MHz  
WDW EM  
SSB 0  
LB 1.00 Hz  
GB 0  
PC 1.40

166.31  
165.44  
165.00  
157.99  
157.51  
156.52  
154.24  
151.77  
150.23  
149.60  
125.83  
125.79  
125.74  
125.15  
124.54  
124.52  
121.10  
121.00  
120.35  
118.22  
118.18  
118.12  
118.08

36.60  
36.53  
36.46  
30.26  
30.17  
30.14  
30.12

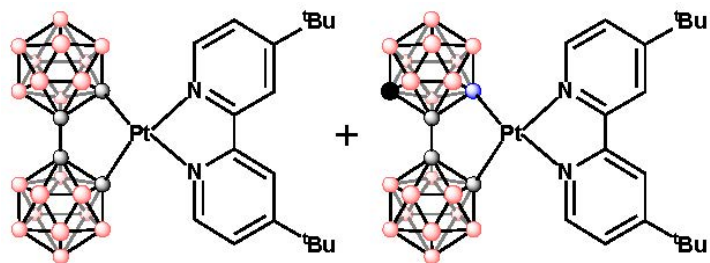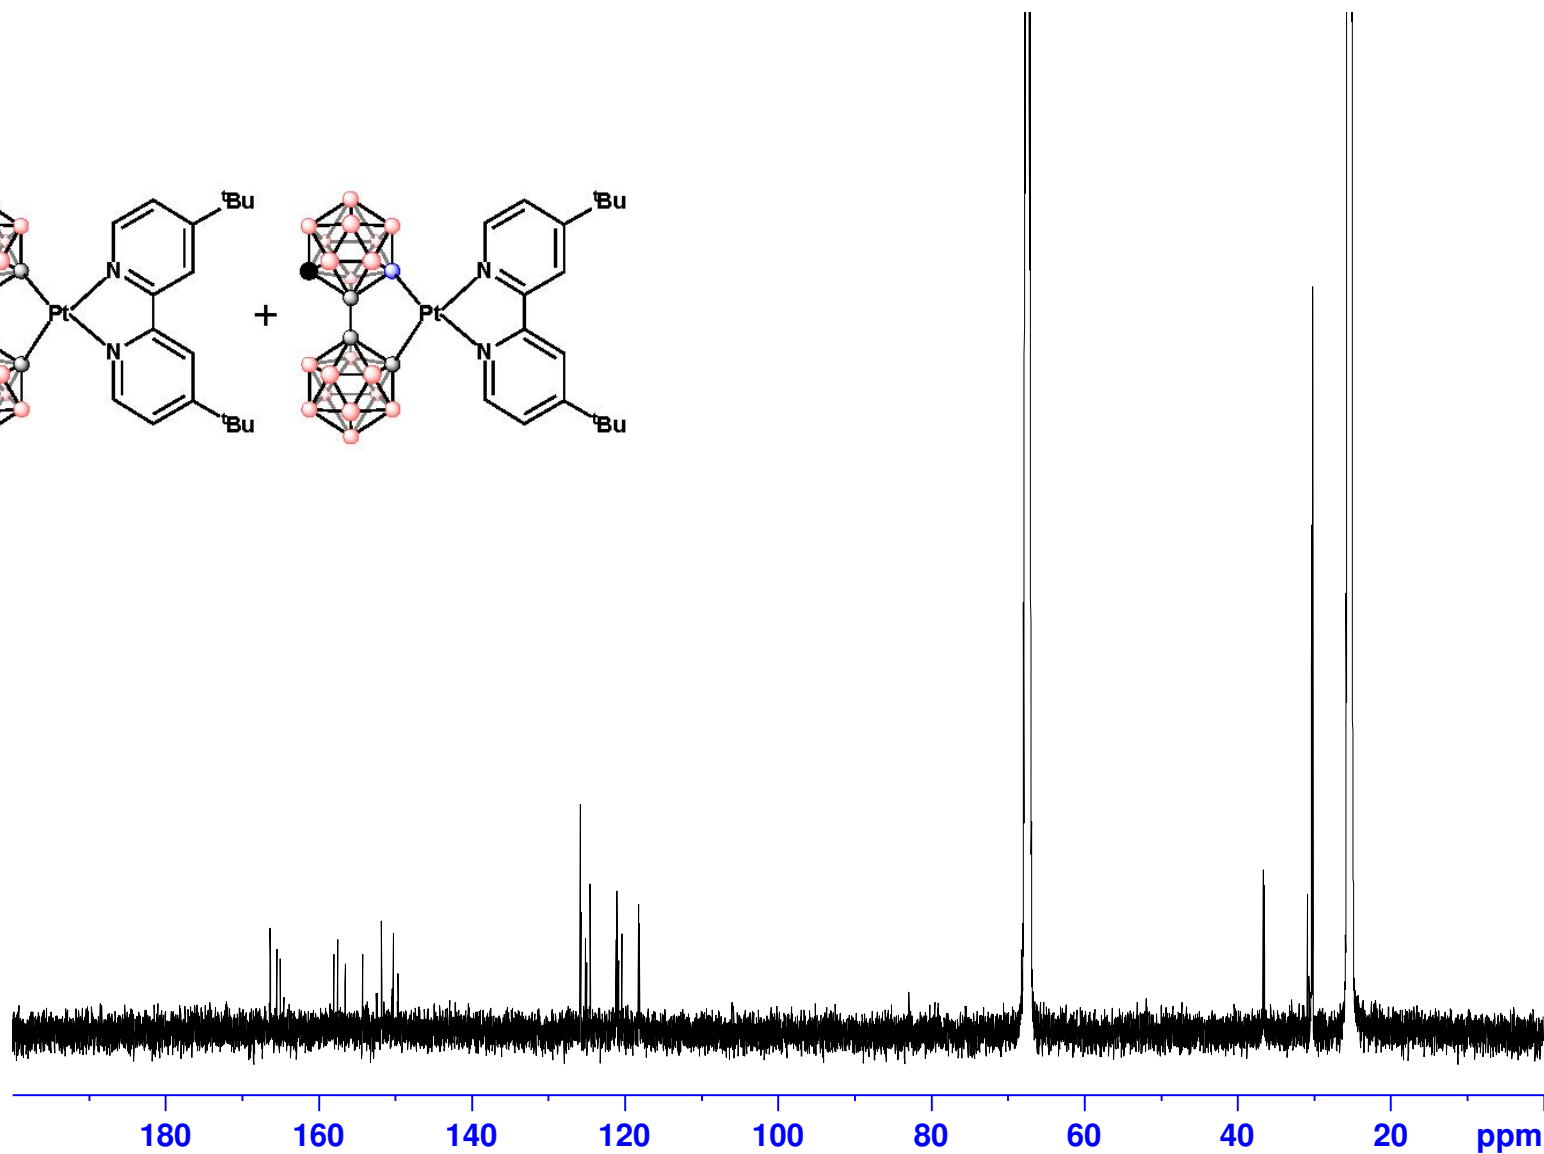

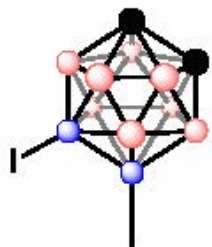

Current Data Parameters  
 NAME i2-ocb kk-1-265ish  
 EXPNO 10  
 PROCNO 1

F2 - Acquisition Parameters  
 Date\_ 20151002  
 Time 11.30  
 INSTRUM av500  
 PROBHD 5 mm DCH 13C-1  
 PULPROG zg30  
 TD 65536  
 SOLVENT CDC13  
 NS 32  
 DS 0  
 SWH 10000.000 Hz  
 FIDRES 0.152588 Hz  
 AQ 3.2767999 sec  
 RG 12.14  
 DW 50.000 usec  
 DE 10.00 usec  
 TE 298.0 K  
 D1 2.00000000 sec  
 TD0 1

===== CHANNEL f1 =====  
 SFO1 500.1330008 MHz  
 NUC1 1H  
 P1 10.00 usec  
 PLW1 13.50000000 W

F2 - Processing parameters  
 SI 65536  
 SF 500.1300122 MHz  
 WDW EM  
 SSB 0  
 LB 0.30 Hz  
 GB 0  
 PC 1.00

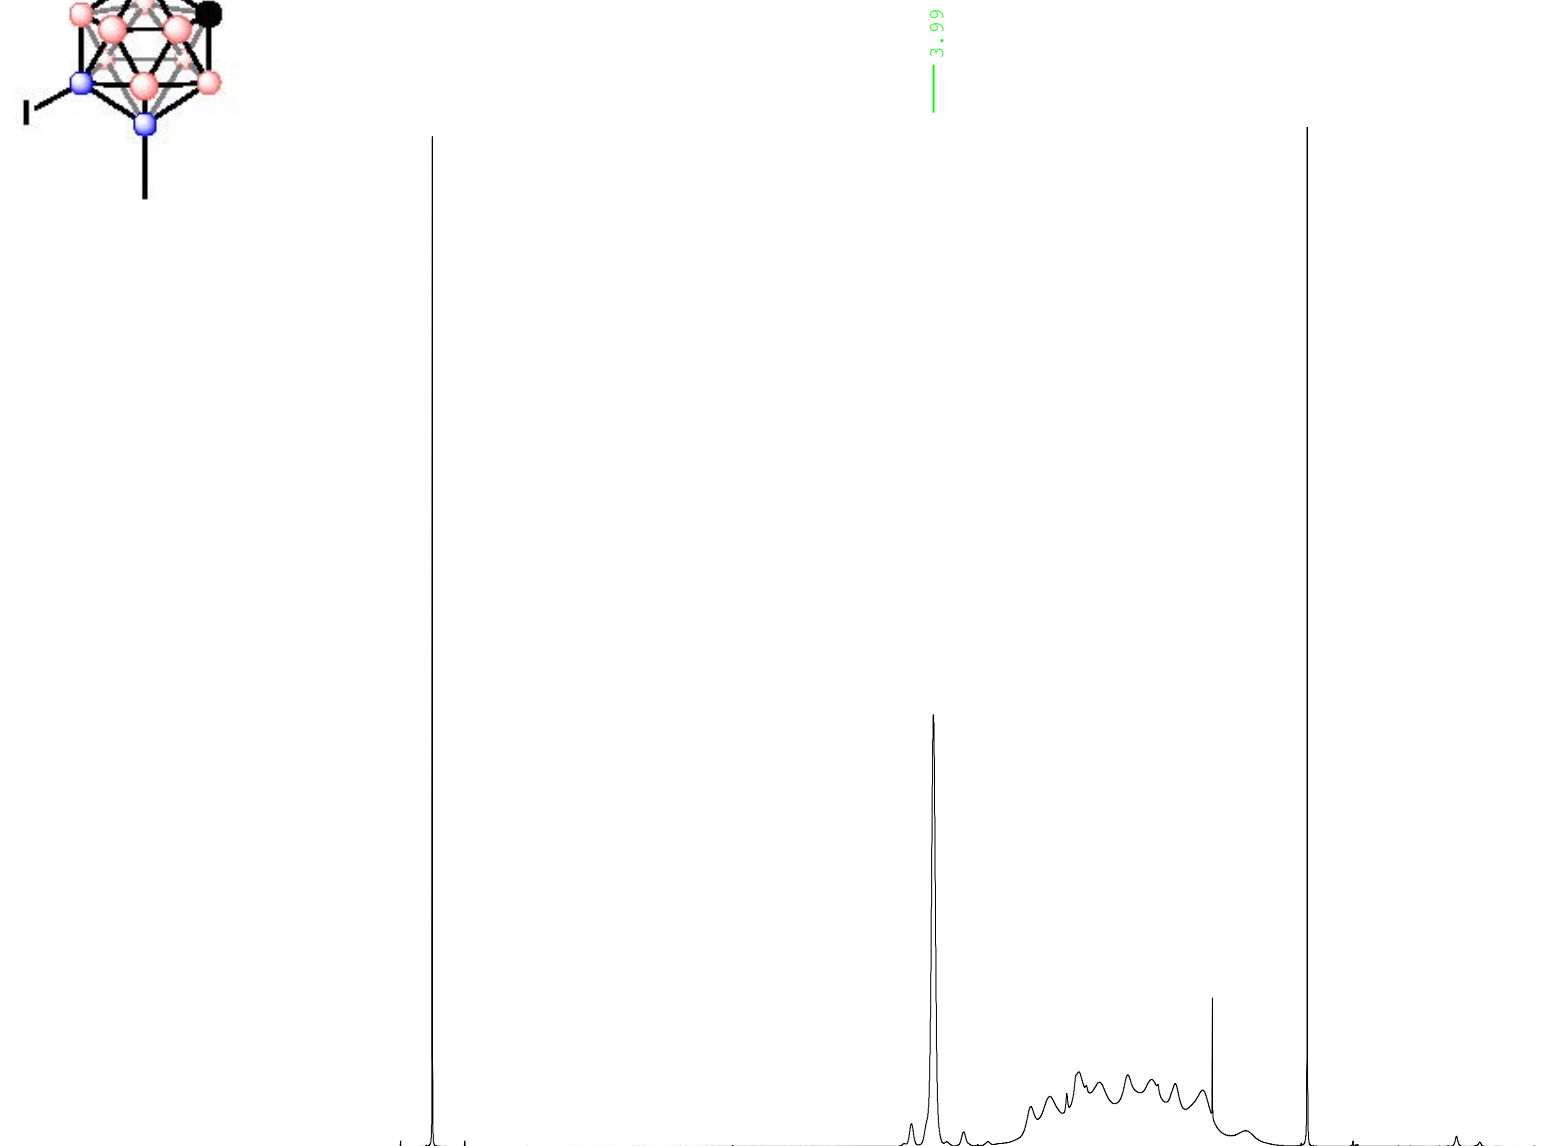

3.99

2.00

9.05

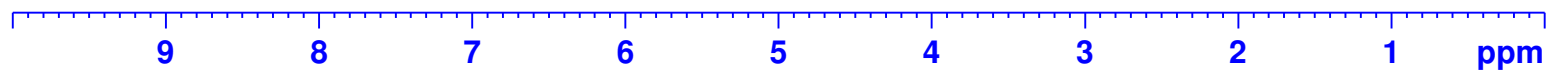

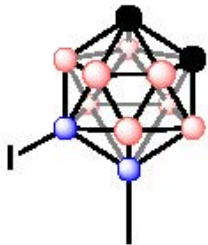

-4.95  
-5.93  
-12.08  
-13.17  
-13.96  
-14.83

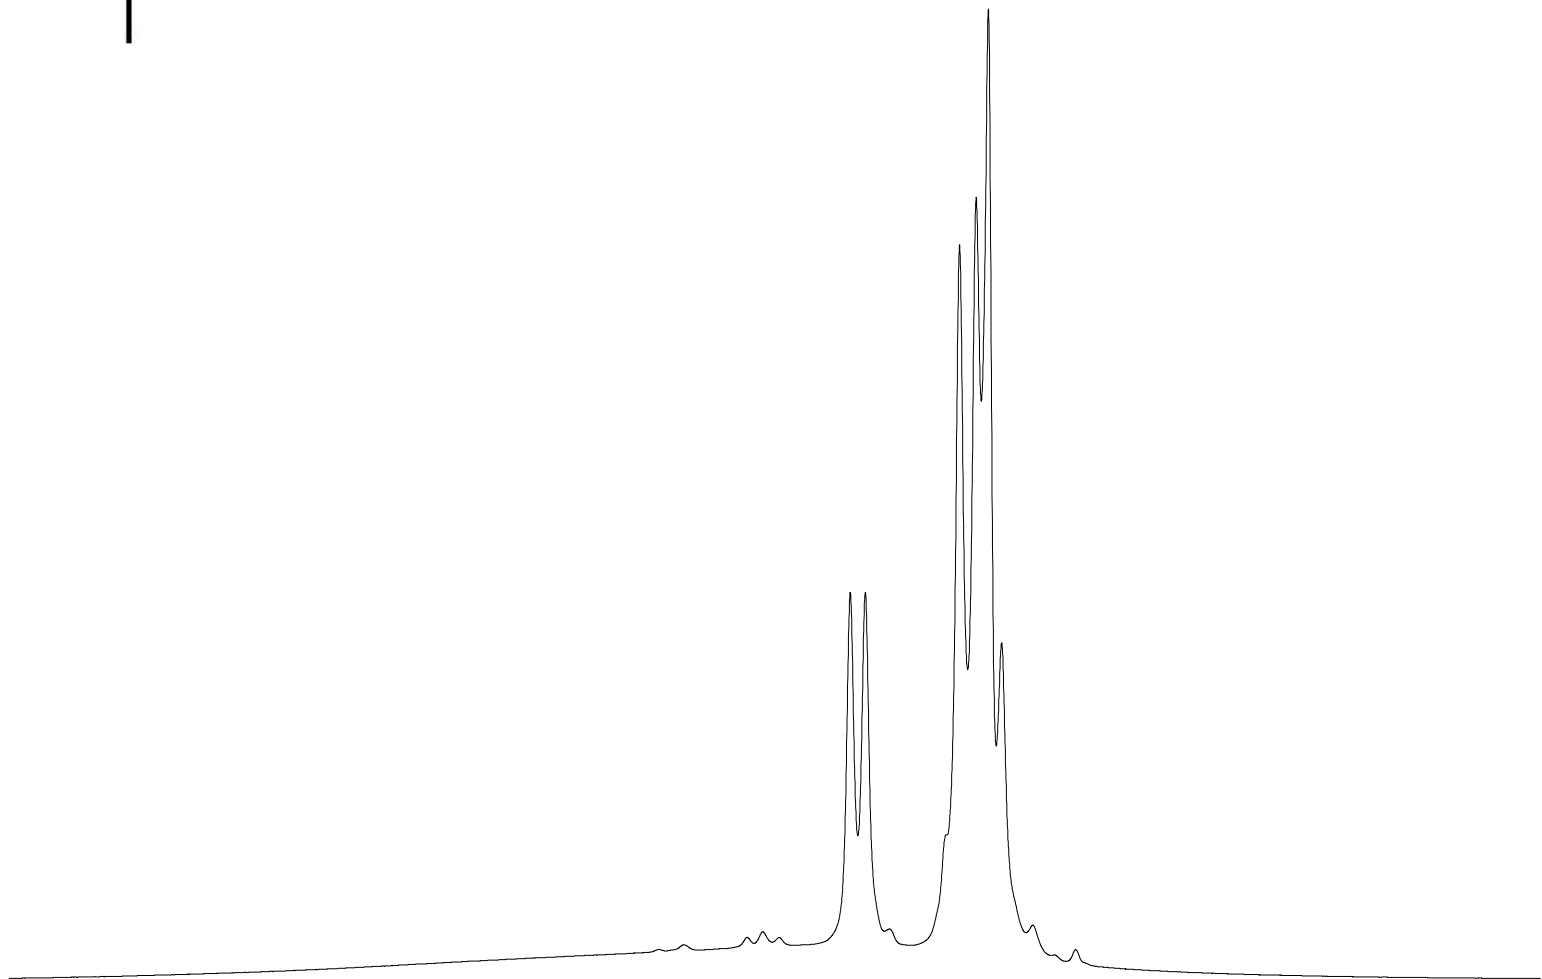

0.93  
1.00  
2.23  
1.89  
2.47  
0.93

Current Data Parameters  
NAME kk-1-264 i2-ocb  
EXPNO 2  
PROCNO 1

F2 - Acquisition Parameters  
Date\_ 20151002  
Time 12.33  
INSTRUM drx500  
PROBHD 5 mm bb-Z Z800  
PULPROG zgdc  
TD 7168  
SOLVENT CDC13  
NS 2048  
DS 4  
SWH 64102.562 Hz  
FIDRES 8.942880 Hz  
AQ 0.0559104 sec  
RG 362  
DW 7.800 usec  
DE 6.00 usec  
TE 296.9 K  
D1 0.00000400 sec  
d11 0.03000000 sec  
TD0 1

==== CHANNEL f1 =====  
NUC1 11B  
P1 8.00 usec  
PL1 -2.00 dB  
SFO1 160.5257140 MHz

==== CHANNEL f2 =====  
CPDPRG[2] waltz16  
NUC2 off  
PCPD2 100.00 usec  
PL2 0 dB  
PL12 17.52 dB  
SFO2 500.3300000 MHz

F2 - Processing parameters  
SI 32768  
SF 160.5257010 MHz  
WDW EM  
SSB 0  
LB 10.00 Hz  
GB 0  
PC 1.40

40 30 20 10 0 -10 -20 -30 -40 ppm

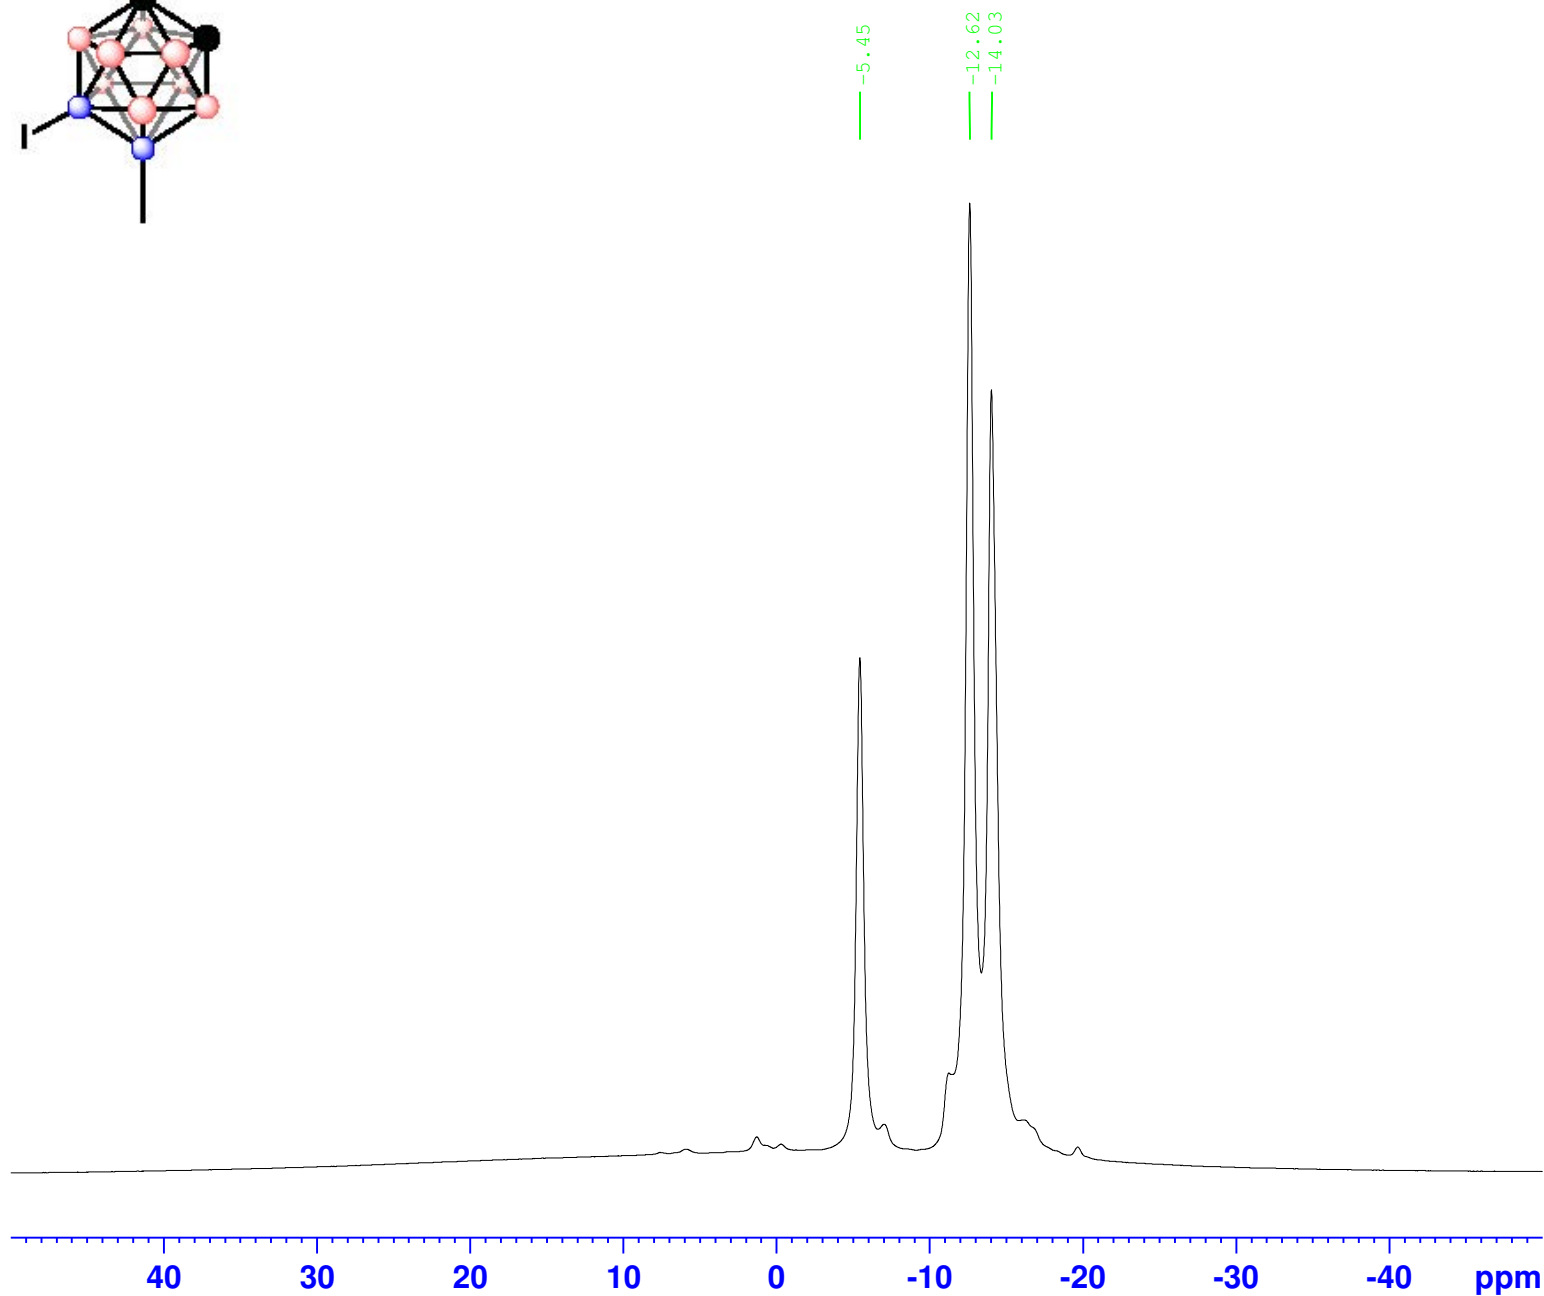

Current Data Parameters  
 NAME kk-1-264 i2-ocb  
 EXPNO 1  
 PROCNO 1

F2 - Acquisition Parameters  
 Date\_ 20151002  
 Time 12.22  
 INSTRUM drx500  
 PROBHD 5 mm bb-Z Z800  
 PULPROG zgdc  
 TD 7168  
 SOLVENT D2O  
 NS 4096  
 DS 4  
 SWH 64102.562 Hz  
 FIDRES 8.942880 Hz  
 AQ 0.0559104 sec  
 RG 1024  
 DW 7.800 usec  
 DE 6.00 usec  
 TE 297.2 K  
 D1 0.00000400 sec  
 d11 0.03000000 sec  
 TD0 1

==== CHANNEL f1 =====  
 NUC1 11B  
 P1 8.00 usec  
 PL1 -2.00 dB  
 SFO1 160.5257136 MHz

==== CHANNEL f2 =====  
 CPDPRG[2] waltz16  
 NUC2 1H  
 PCPD2 100.00 usec  
 PL2 0 dB  
 PL12 17.52 dB  
 SFO2 500.3330020 MHz

F2 - Processing parameters  
 SI 32768  
 SF 160.5257013 MHz  
 WDW EM  
 SSB 0  
 LB 10.00 Hz  
 GB 0  
 PC 1.40

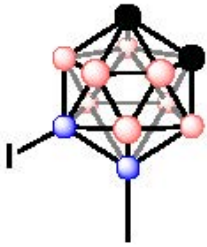

51.71

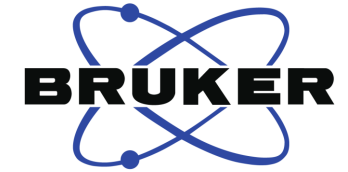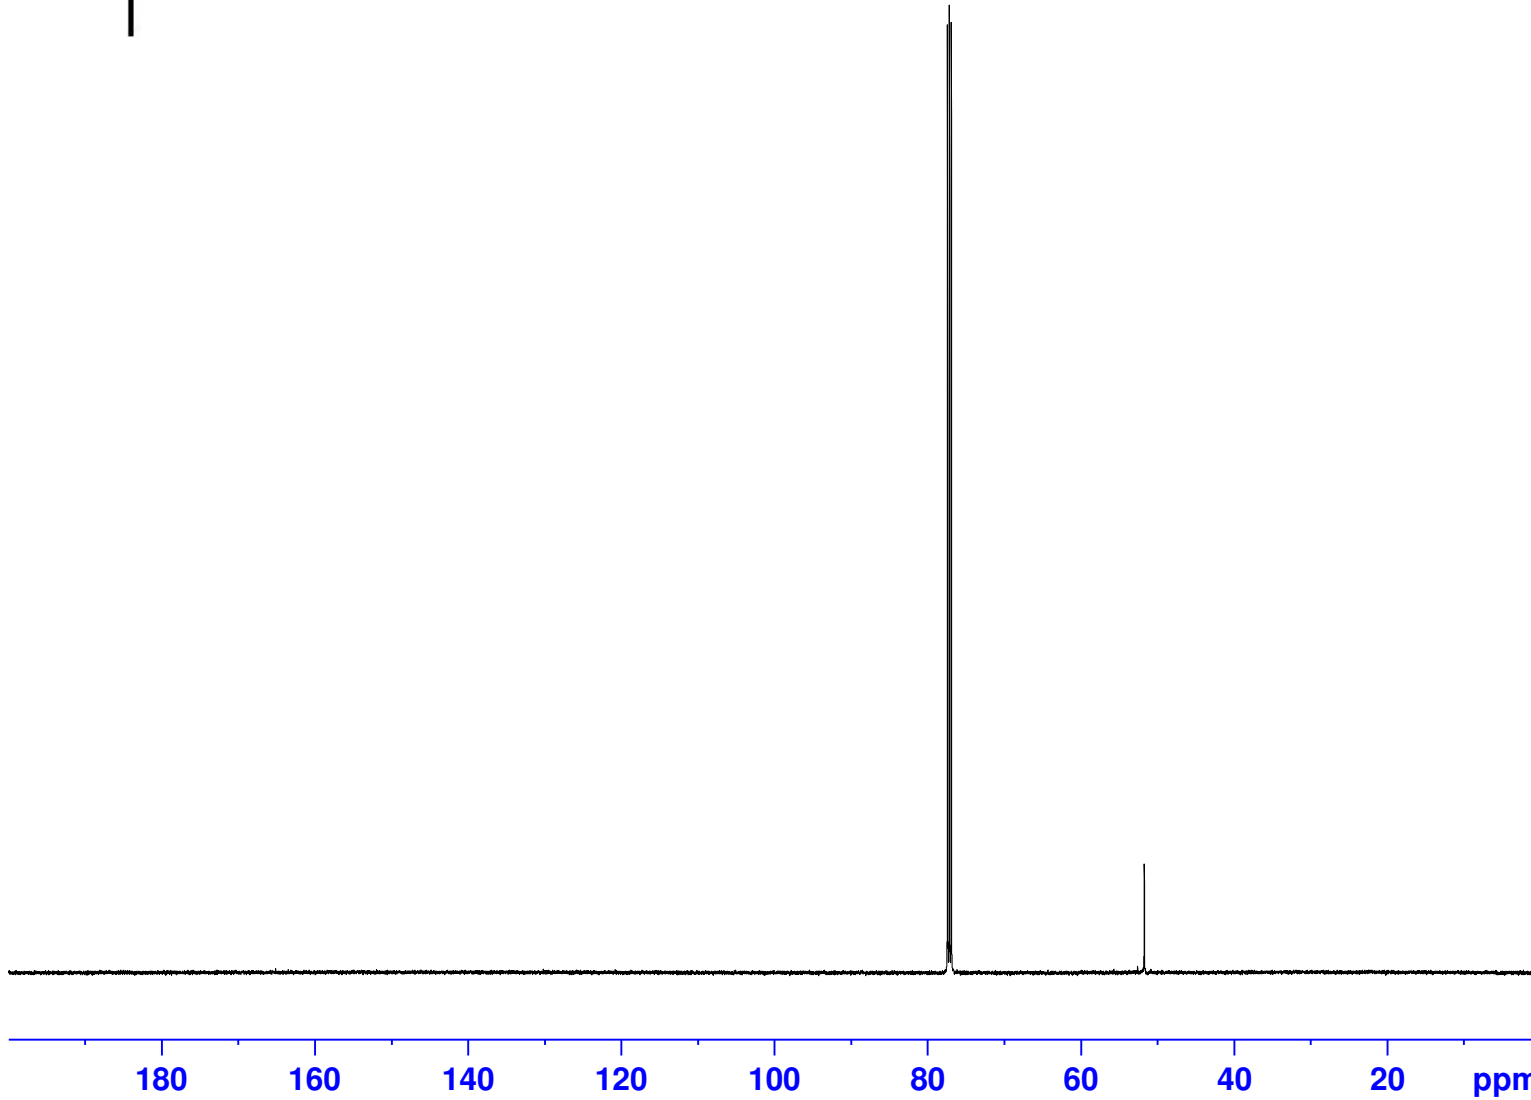

```

Current Data Parameters
NAME      i2-ocb kk-1-265ish
EXPNO     11
PROCNO    1

F2 - Acquisition Parameters
Date_     20151002
Time      11.33
INSTRUM   av500
PROBHD    5 mm DCH 13C-1
PULPROG   zgpg30
TD         65536
SOLVENT   CDC13
NS         32
DS         2
SWH        31250.000 Hz
FIDRES     0.476837 Hz
AQ         1.0485760 sec
RG         204.54
DW         16.000 usec
DE         18.00 usec
TE         298.0 K
D1         2.00000000 sec
D11        0.03000000 sec
TD0        1

===== CHANNEL f1 =====
SFO1      125.7722511 MHz
NUC1       13C
P1         9.63 usec
PLW1      23.00000000 W

===== CHANNEL f2 =====
SFO2      500.1330008 MHz
NUC2       1H
CPDPRG[2]  waltz16
PCPD2      80.00 usec
PLW2      13.50000000 W
PLW12     0.21094000 W
PLW13     0.13500001 W

F2 - Processing parameters
SI         131072
SF         125.7577744 MHz
WDW        EM
SSB        0
LB         1.00 Hz
GB         0
PC         1.40
  
```

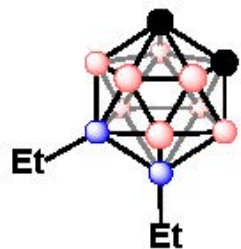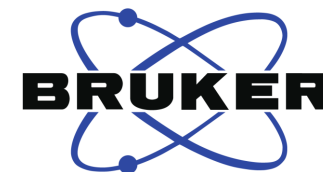

3.38  
0.88  
0.70  
0.68

Current Data Parameters  
 NAME diethyl-o-carborane pure  
 EXPNO 10  
 PROCNO 1

F2 - Acquisition Parameters  
 Date\_ 20151103  
 Time\_ 17.47  
 INSTRUM av500  
 PROBHD 5 mm DCH 13C-1  
 PULPROG zg30  
 TD 65536  
 SOLVENT CDCl3  
 NS 64  
 DS 0  
 SWH 10000.000 Hz  
 FIDRES 0.152588 Hz  
 AQ 3.2767999 sec  
 RG 3.63  
 DW 50.000 usec  
 DE 10.00 usec  
 TE 298.0 K  
 D1 2.00000000 sec  
 TD0 1

==== CHANNEL f1 =====  
 SF01 500.1330008 MHz  
 NUC1 1H  
 P1 10.00 usec  
 PLW1 13.50000000 W

F2 - Processing parameters  
 SI 65536  
 SF 500.1300123 MHz  
 WDW EM  
 SSB 0  
 LB 0.30 Hz  
 GB 0  
 PC 1.00

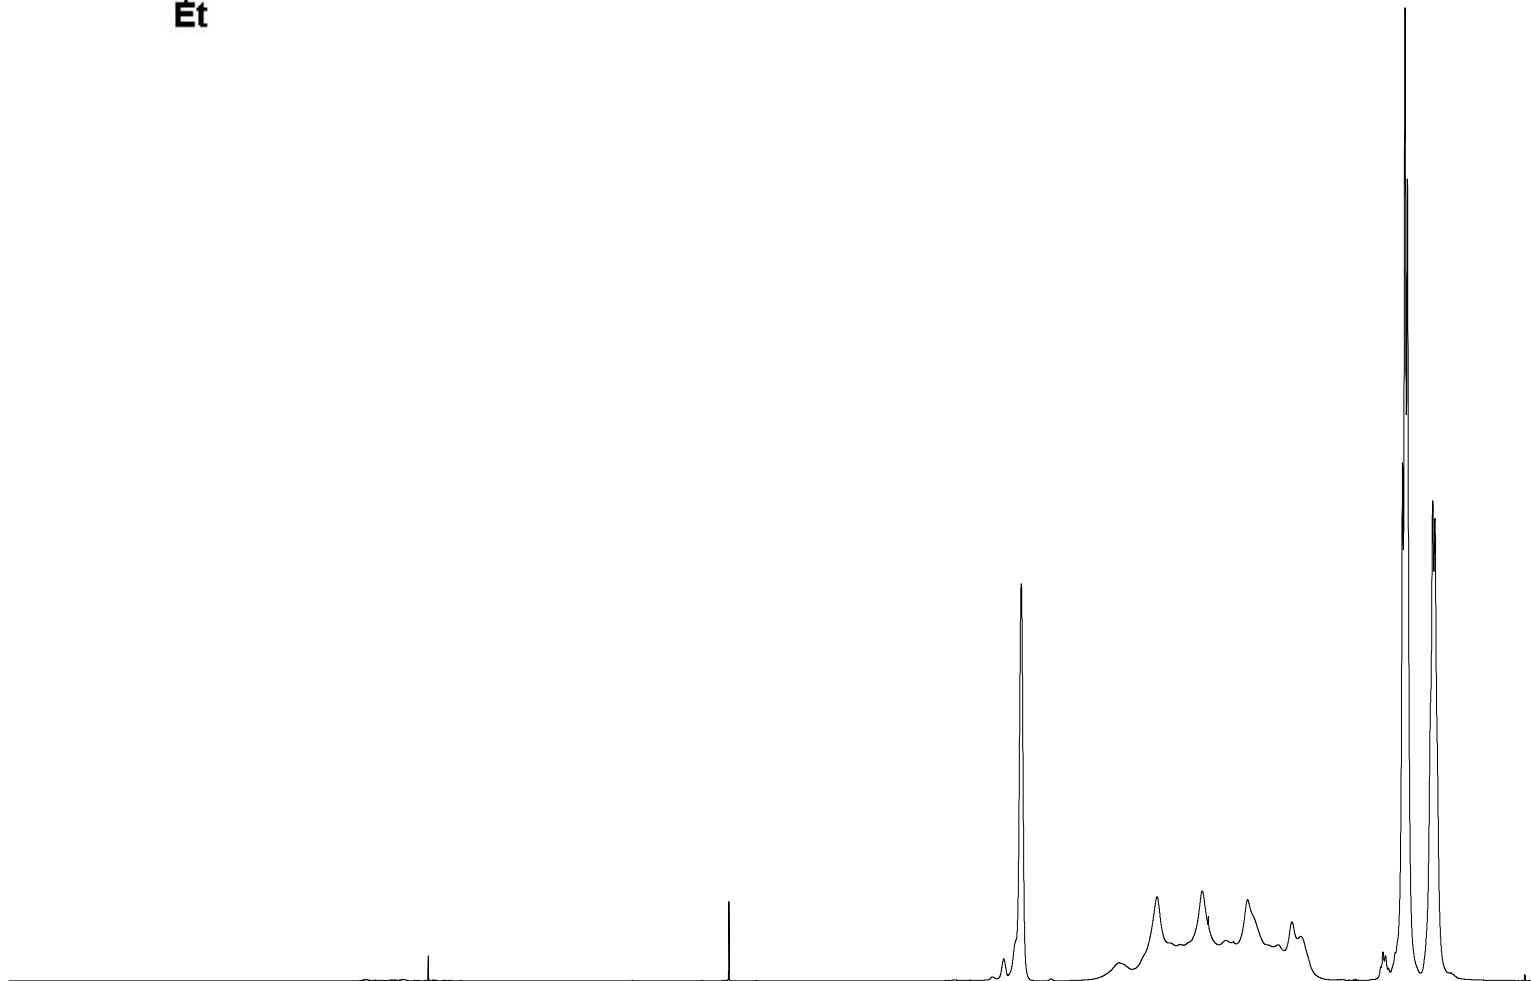

9 8 7 6 5 4 3 2 1 ppm

2.00  
8.23  
5.93  
4.01



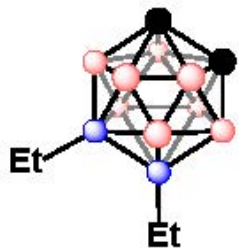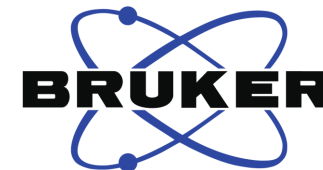

Current Data Parameters  
 NAME diethyl-o-carborane pure 11b  
 EXPNO 2  
 PROCNO 1

F2 - Acquisition Parameters  
 Date\_ 20151103  
 Time 20.02  
 INSTRUM drx500  
 PROBHD 5 mm bb-Z Z800  
 PULPROG zg  
 TD 7168  
 SOLVENT D2O  
 NS 4096  
 DS 4  
 SWH 64102.562 Hz  
 FIDRES 8.942880 Hz  
 AQ 0.0559104 sec  
 RG 25.4  
 DW 7.800 usec  
 DE 6.00 usec  
 TE 298.0 K  
 D1 0.00000400 sec  
 TD0 1

===== CHANNEL f1 =====  
 NUC1 11B  
 P1 8.00 usec  
 PL1 -2.00 dB  
 SFO1 160.5257136 MHz

F2 - Processing parameters  
 SI 32768  
 SF 160.5257136 MHz  
 WDW EM  
 SSB 0  
 LB 1.00 Hz  
 GB 0  
 PC 1.40

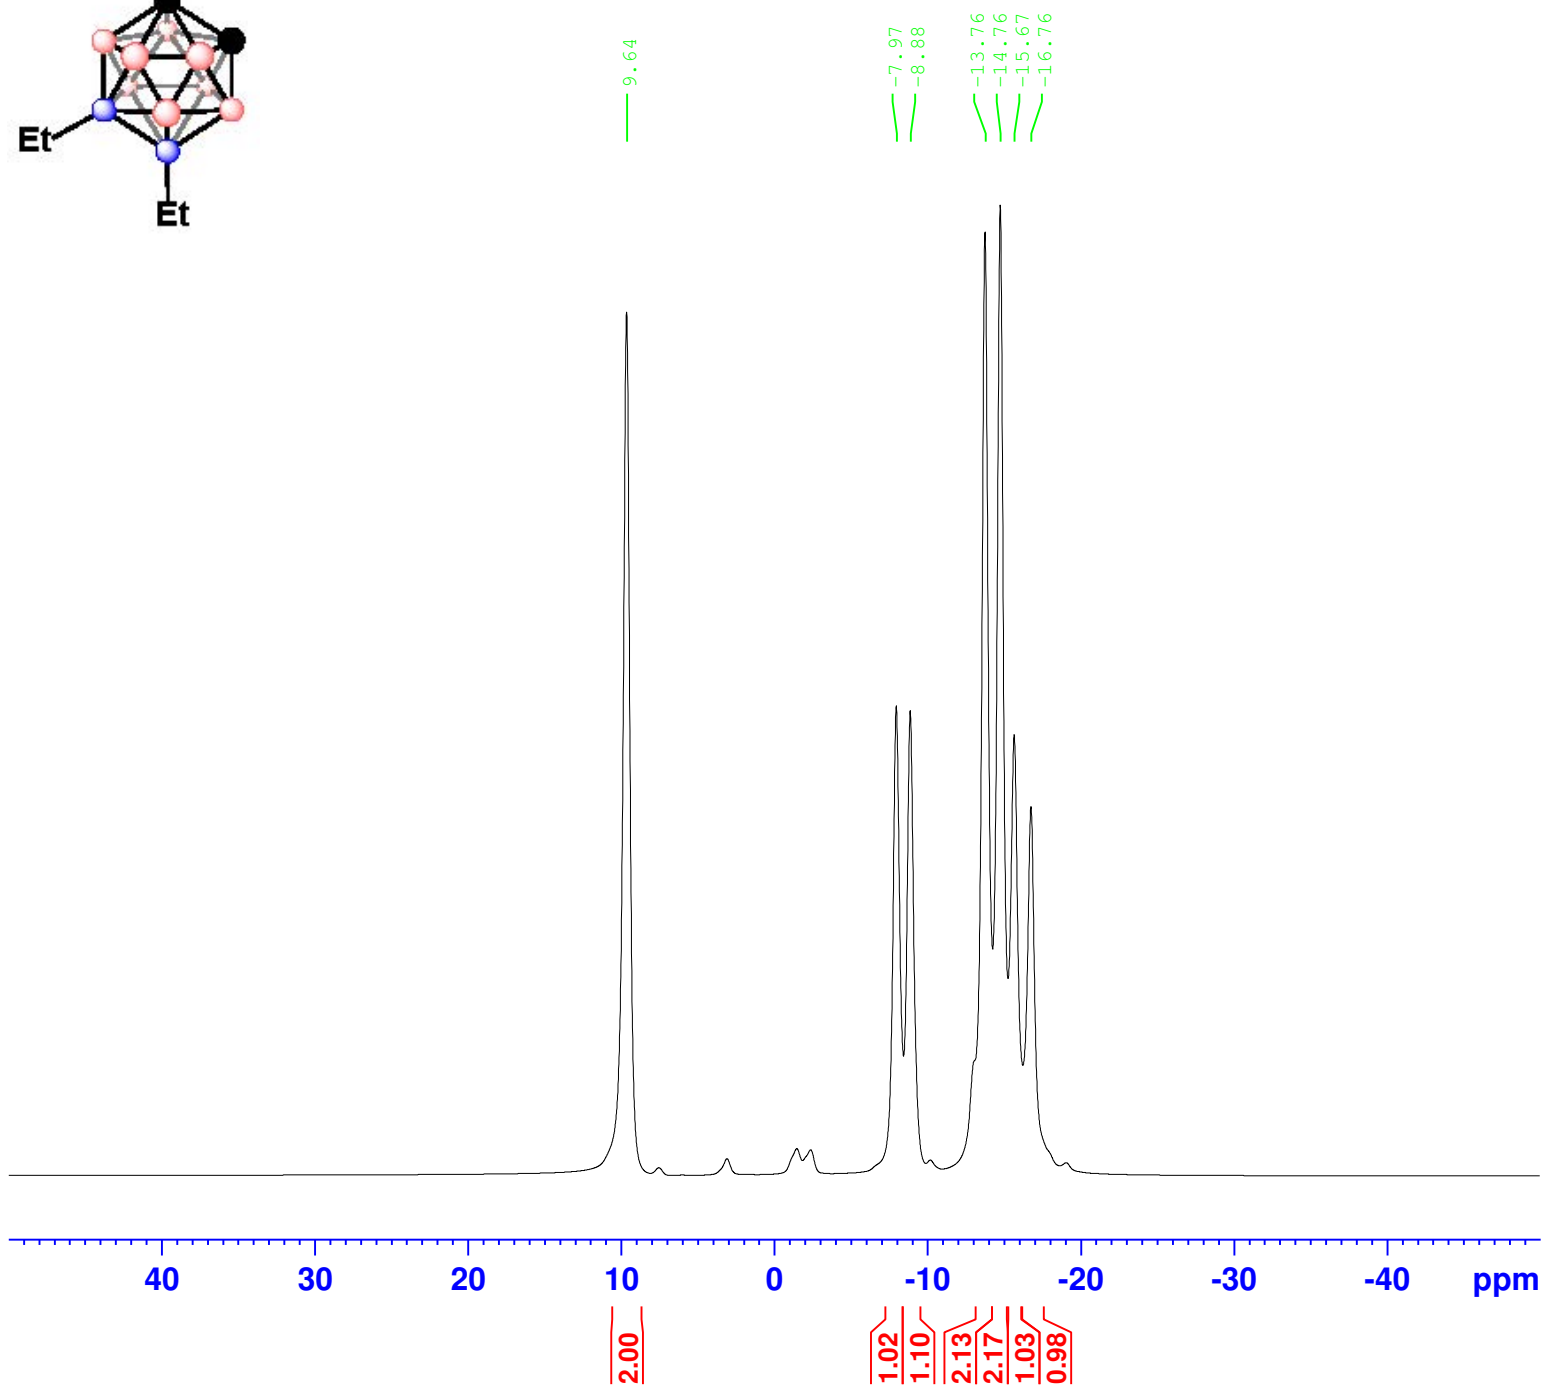

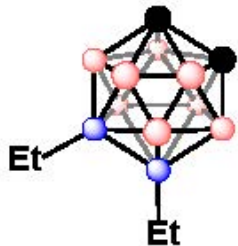

9.64

-8.43

-14.26

-16.22

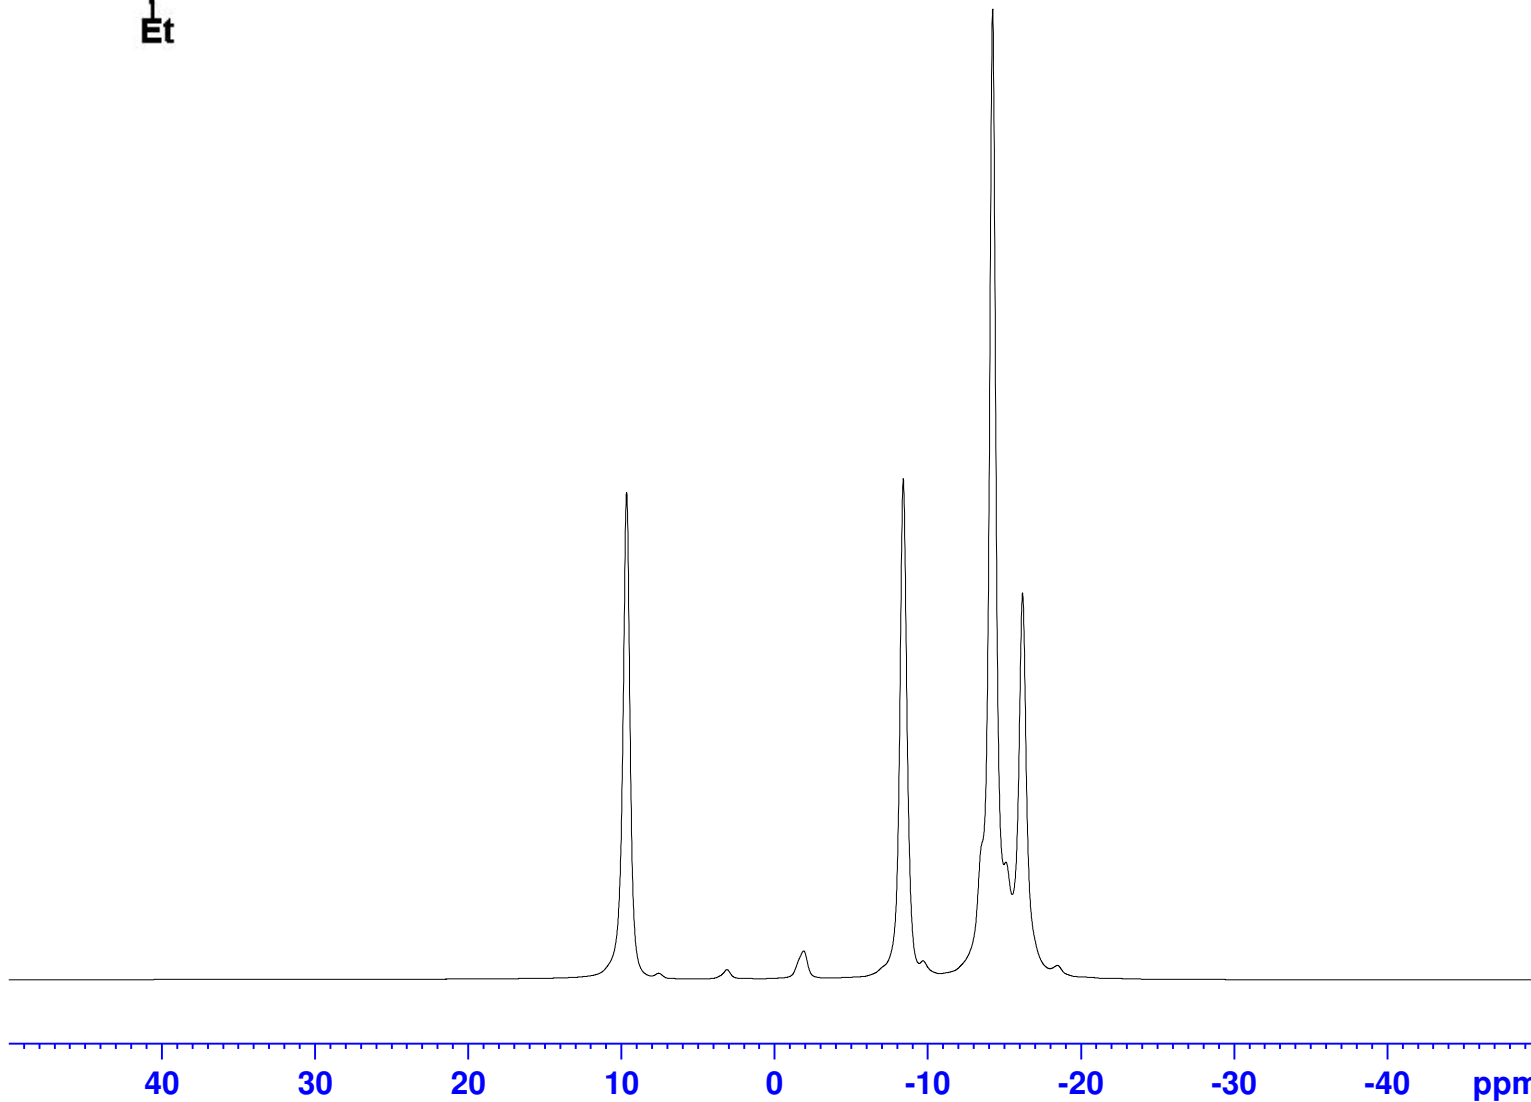

Current Data Parameters  
 NAME diethyl-o-carborane pure 11b  
 EXPNO 1  
 PROCNO 1

F2 - Acquisition Parameters  
 Date\_ 20151103  
 Time 20.15  
 INSTRUM drx500  
 PROBHD 5 mm bb-Z Z800  
 PULPROG zgdc  
 TD 7168  
 SOLVENT D2O  
 NS 4096  
 DS 4  
 SWH 64102.562 Hz  
 FIDRES 8.942880 Hz  
 AQ 0.0559104 sec  
 RG 28.5  
 DW 7.800 usec  
 DE 6.00 usec  
 TE 298.0 K  
 D1 0.00000400 sec  
 d11 0.03000000 sec  
 TD0 1

===== CHANNEL f1 =====  
 NUC1 11B  
 P1 8.00 usec  
 PL1 -2.00 dB  
 SFO1 160.5257136 MHz

===== CHANNEL f2 =====  
 CPDPRG[2] waltz16  
 NUC2 1H  
 PCPD2 100.00 usec  
 PL2 0 dB  
 PL12 17.52 dB  
 SFO2 500.3330020 MHz

F2 - Processing parameters  
 SI 32768  
 SF 160.5257136 MHz  
 WDW EM  
 SSB 0  
 LB 10.00 Hz  
 GB 0  
 PC 1.40

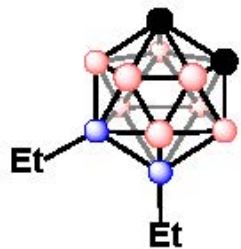

47.71

13.52

9.35



Current Data Parameters  
 NAME diethyl-o-carborane pure  
 EXPNO 11  
 PROCNO 1

F2 - Acquisition Parameters  
 Date\_ 20151103  
 Time 18.43  
 INSTRUM av500  
 PROBHD 5 mm DCH 13C-1  
 PULPROG zgpg30  
 TD 65536  
 SOLVENT CDC13  
 NS 1024  
 DS 2  
 SWH 31250.000 Hz  
 FIDRES 0.476837 Hz  
 AQ 1.0485760 sec  
 RG 204.54  
 DW 16.000 usec  
 DE 18.00 usec  
 TE 298.0 K  
 D1 2.00000000 sec  
 D11 0.03000000 sec  
 TD0 1

===== CHANNEL f1 =====  
 SFO1 125.7722511 MHz  
 NUC1 13C  
 P1 9.63 usec  
 PLW1 23.00000000 W

===== CHANNEL f2 =====  
 SFO2 500.1330008 MHz  
 NUC2 1H  
 CPDPRG[2] waltz16  
 PCPD2 80.00 usec  
 PLW2 13.50000000 W  
 PLW12 0.21094000 W  
 PLW13 0.13500001 W

F2 - Processing parameters  
 SI 131072  
 SF 125.7577809 MHz  
 WDW EM  
 SSB 0  
 LB 1.00 Hz  
 GB 0  
 PC 1.40

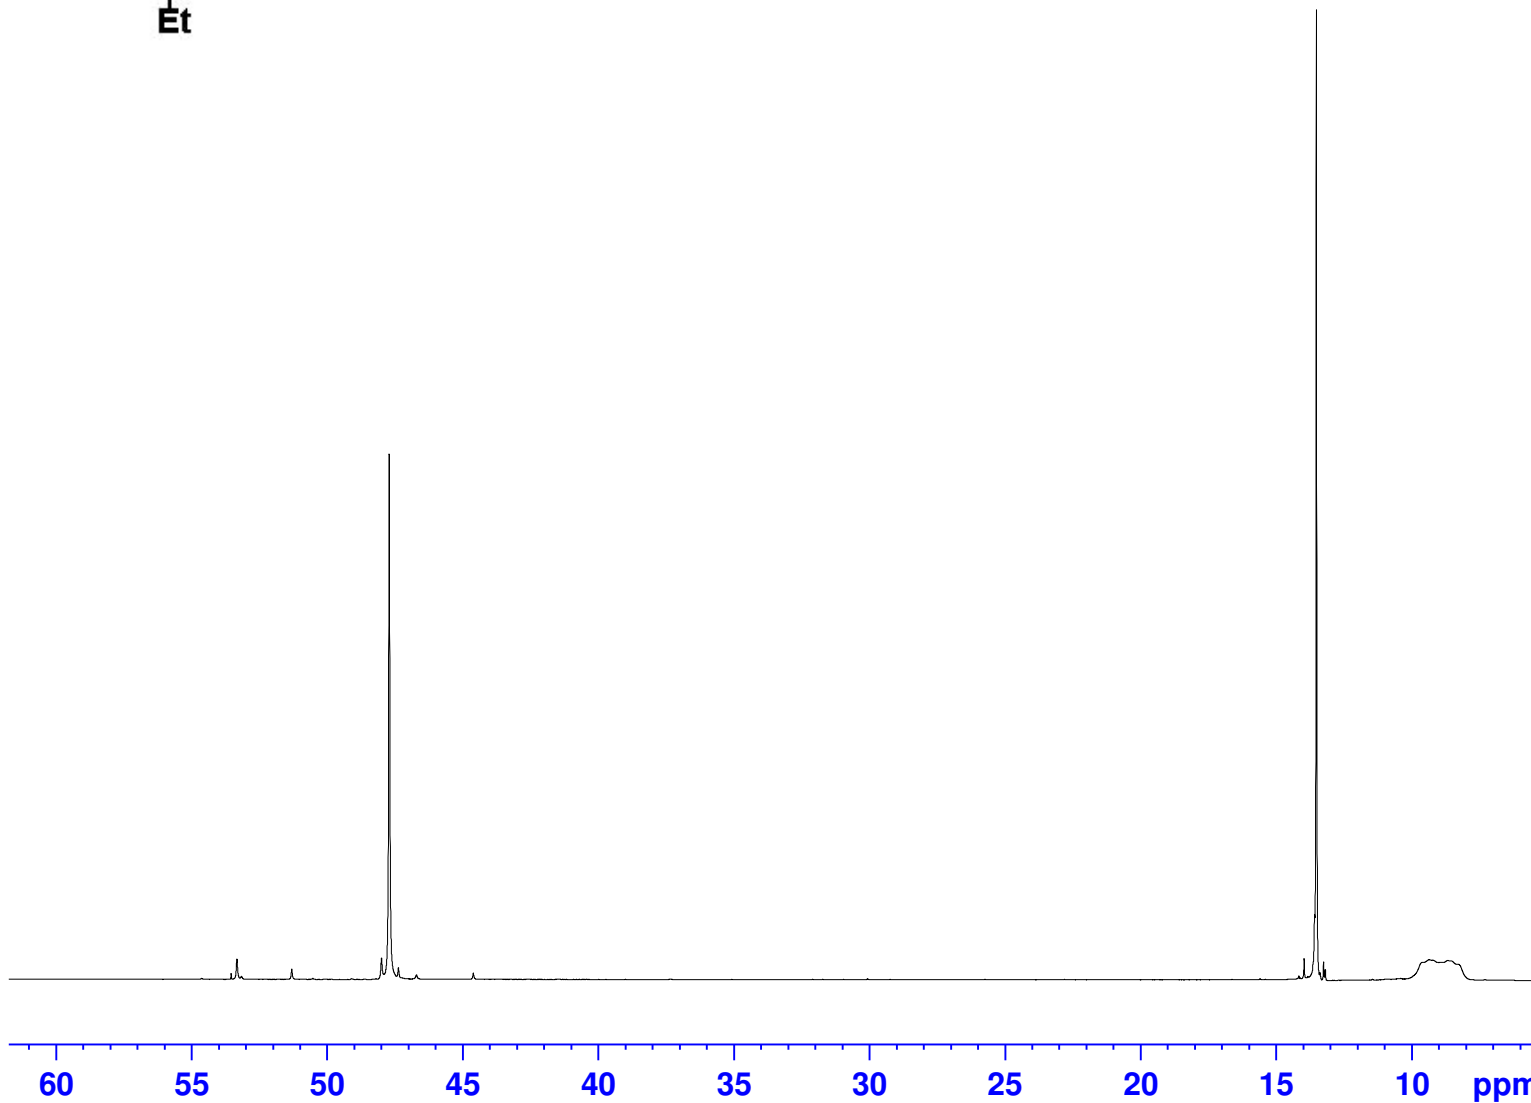

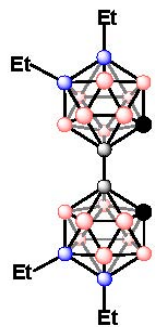

Current Data Parameters  
 NAME kk-1-210 tebcb  
 EXPNO 10  
 PROCNO 1

F2 - Acquisition Parameters  
 Date\_ 20151012  
 Time 17.06  
 INSTRUM av500  
 PROBHD 5 mm DCH 13C-1  
 PULPROG zg30  
 TD 65536  
 SOLVENT CDC13  
 NS 128  
 DS 0  
 SWH 10000.000 Hz  
 FIDRES 0.152588 Hz  
 AQ 3.2767999 sec  
 RG 12.14  
 DW 50.000 usec  
 DE 10.00 usec  
 TE 298.0 K  
 D1 2.00000000 sec  
 TD0 1

==== CHANNEL f1 =====  
 SFO1 500.1330008 MHz  
 NUC1 1H  
 P1 10.00 usec  
 PLW1 13.50000000 W

F2 - Processing parameters  
 SI 65536  
 SF 500.1300121 MHz  
 WDW EM  
 SSB 0  
 LB 0.30 Hz  
 GB 0  
 PC 1.00

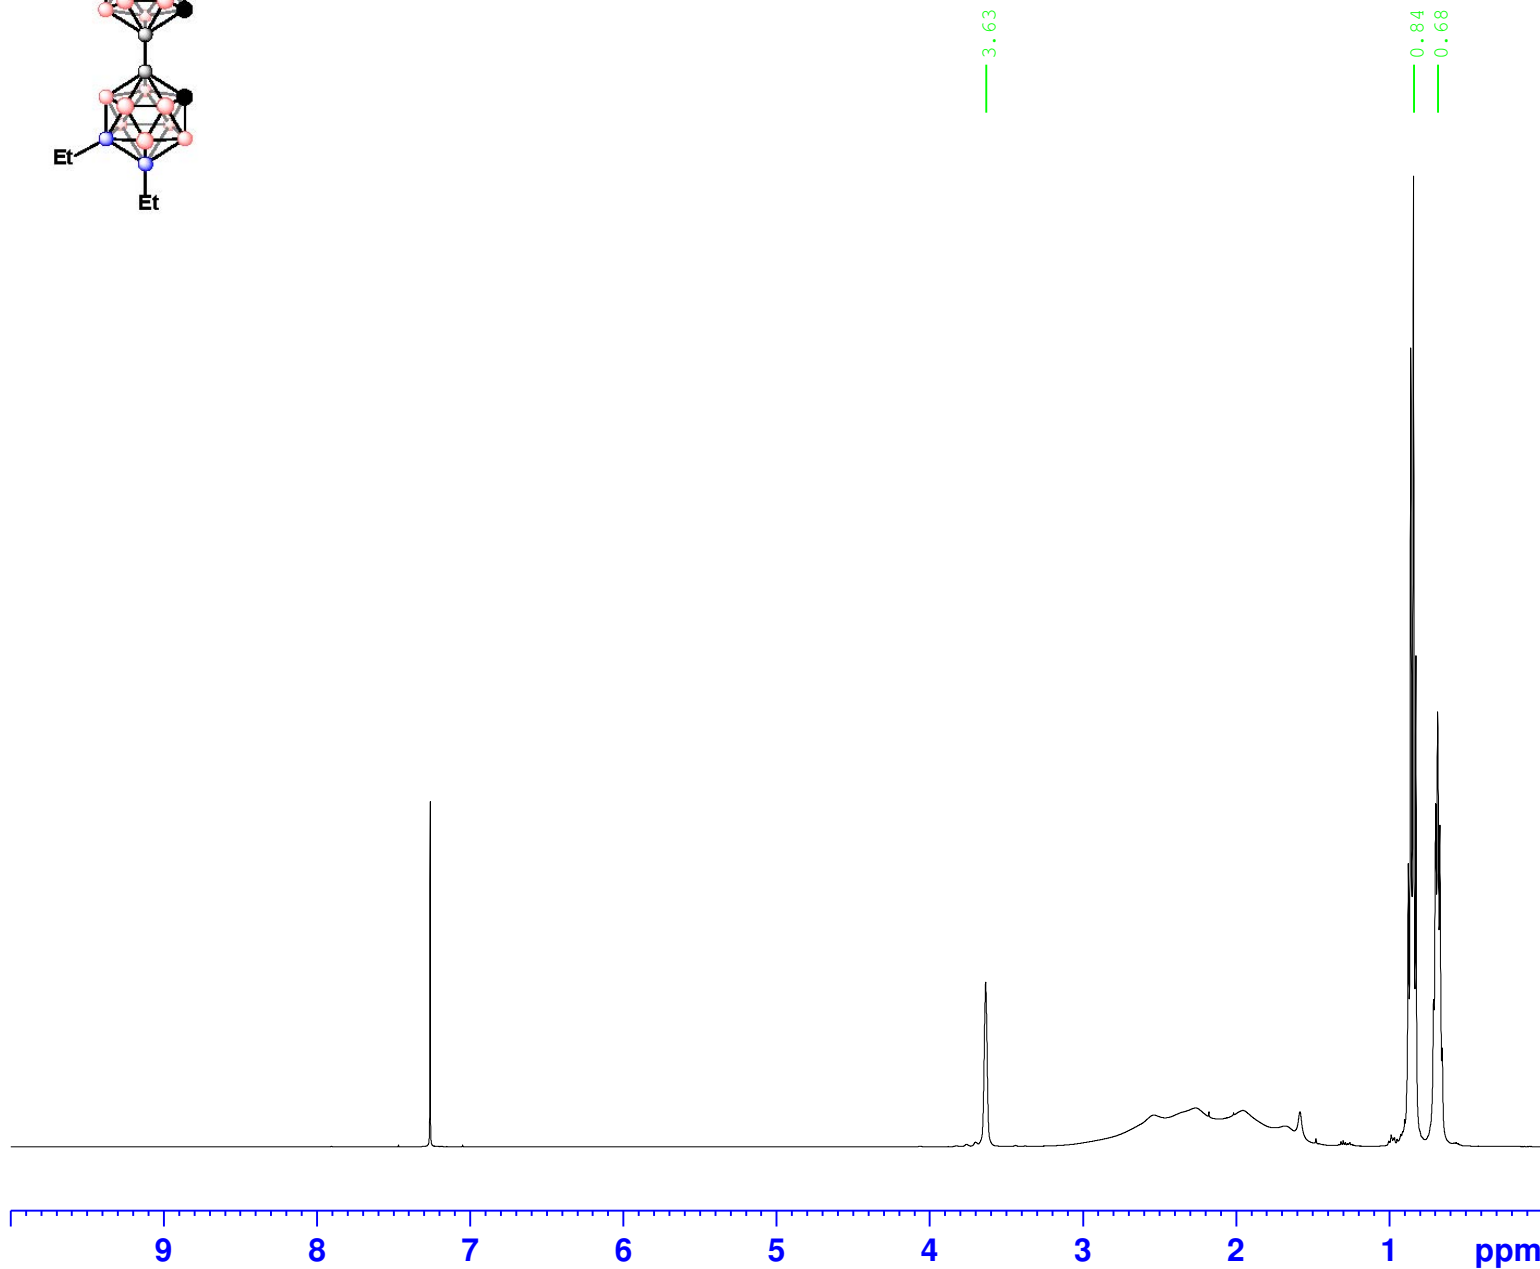

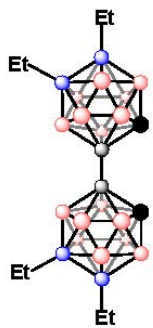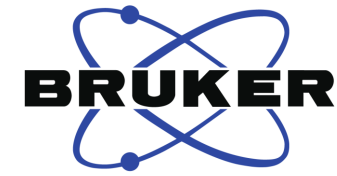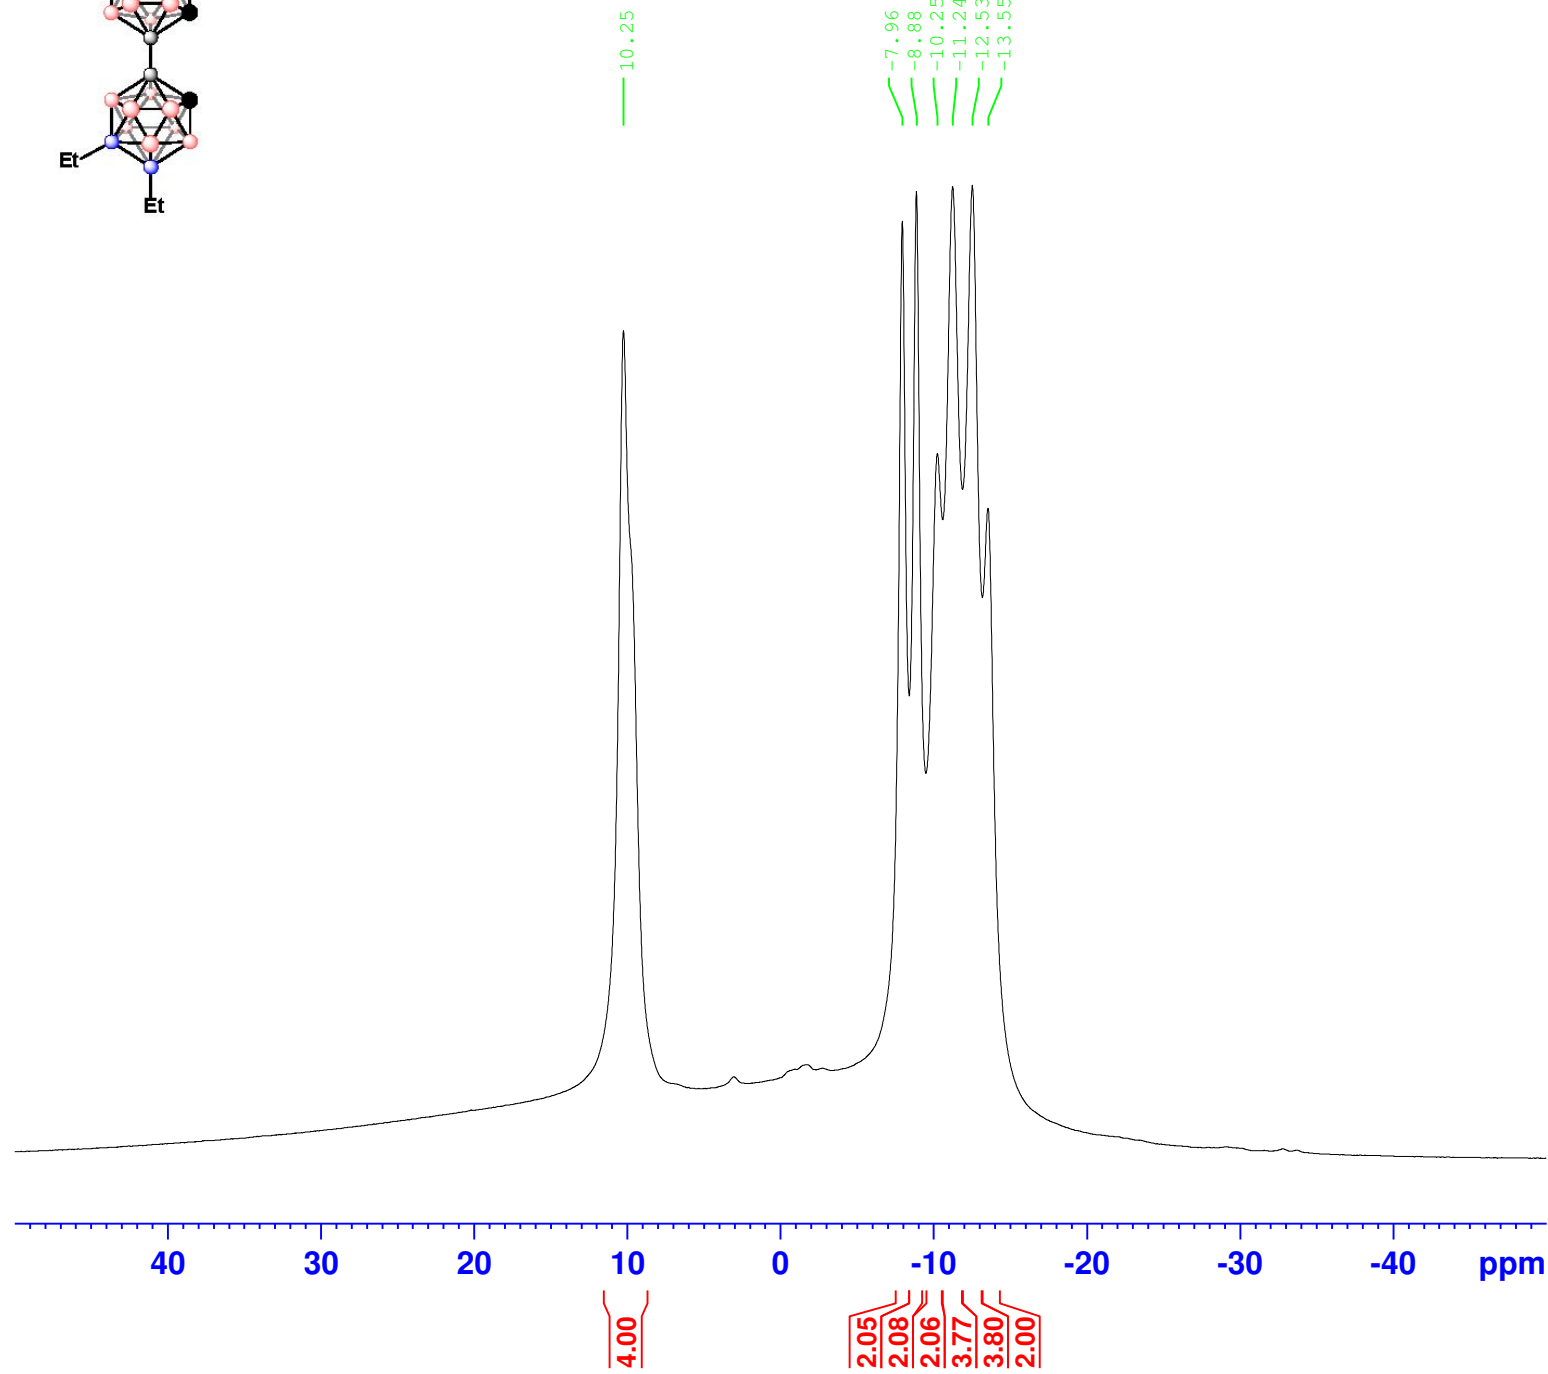

```

Current Data Parameters
NAME      tetraethyl-bis-carborane pure 11b
EXPNO     2
PROCNO    1

F2 - Acquisition Parameters
Date_     20151111
Time      16.24
INSTRUM   drx500
PROBHD    5 mm bb-Z 2800
PULPROG   zgdc
TD         7168
SOLVENT   D2O
NS         2048
DS         4
SWH        64102.562 Hz
FIDRES     8.942880 Hz
AQ         0.0559104 sec
RG         322.5
DW         7.800 usec
DE         6.00 usec
TE         298.0 K
D1         0.00000400 sec
d11        0.03000000 sec
TD0        1

===== CHANNEL f1 =====
NUC1       11B
P1         8.00 usec
PL1        -2.00 dB
SFO1       160.5257140 MHz

===== CHANNEL f2 =====
CPDPRG[2] waltz16
NUC2       off
PCPD2      100.00 usec
PL2        0 dB
PL12       17.52 dB
SFO2       500.3300000 MHz

F2 - Processing parameters
SI         32768
SF         160.5257136 MHz
WDW        EM
SSB        0
LB         10.00 Hz
GB         0
PC         1.40
  
```

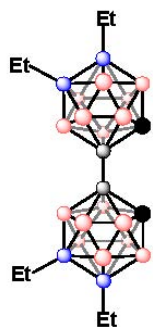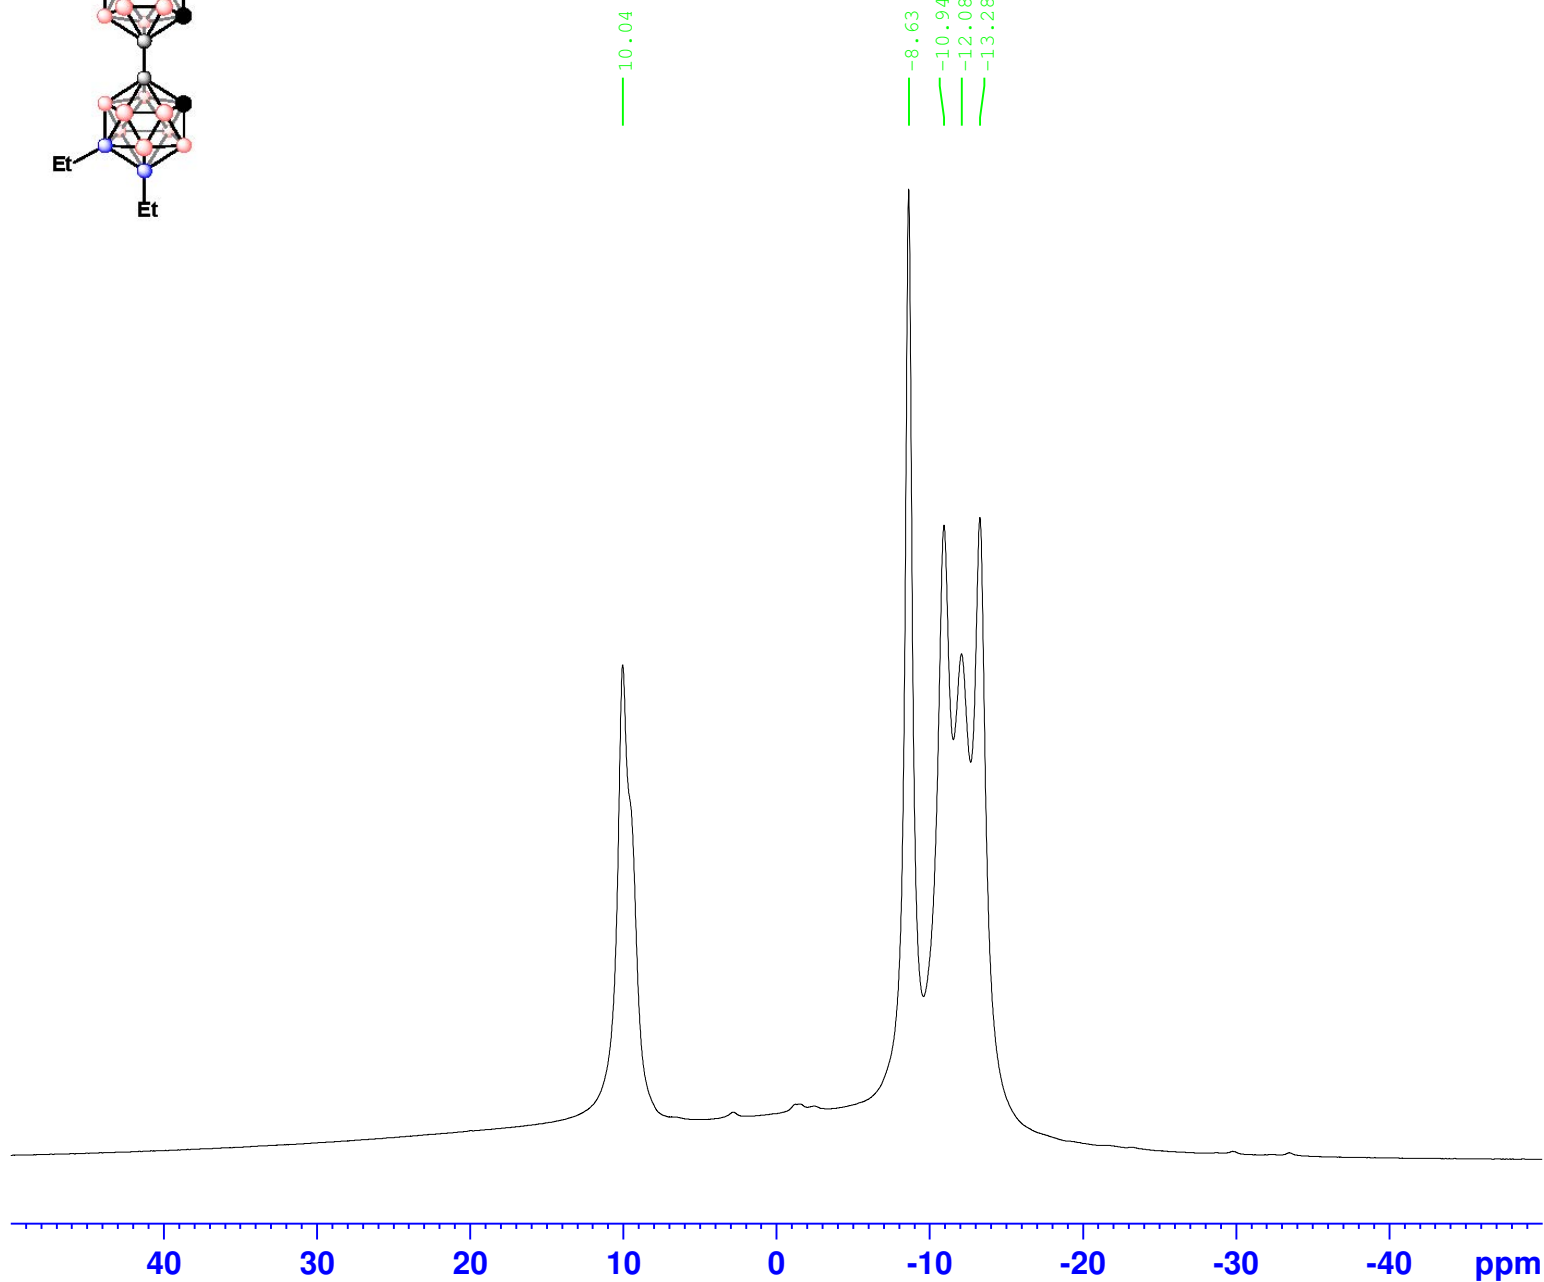

Current Data Parameters  
 NAME tetraethyl-bis-carborane pure 11b  
 EXPNO 1  
 PROCNO 1

F2 - Acquisition Parameters  
 Date\_ 20151111  
 Time 16.19  
 INSTRUM drx500  
 PROBHD 5 mm bb-Z 2800  
 PULPROG zgdc  
 TD 7168  
 SOLVENT D2O  
 NS 2048  
 DS 4  
 SWH 64102.562 Hz  
 FIDRES 8.942880 Hz  
 AQ 0.0559104 sec  
 RG 322.5  
 DW 7.800 usec  
 DE 6.00 usec  
 TE 298.1 K  
 D1 0.00000400 sec  
 d11 0.03000000 sec  
 TD0 1

===== CHANNEL f1 =====  
 NUC1 11B  
 P1 8.00 usec  
 PL1 -2.00 dB  
 SFO1 160.5257136 MHz

===== CHANNEL f2 =====  
 CPDPRG[2] waltz16  
 NUC2 1H  
 PCPD2 100.00 usec  
 PL2 0 dB  
 PL12 17.52 dB  
 SFO2 500.3330020 MHz

F2 - Processing parameters  
 SI 32768  
 SF 160.5257476 MHz  
 WDW EM  
 SSB 0  
 LB 10.00 Hz  
 GB 0  
 PC 1.40

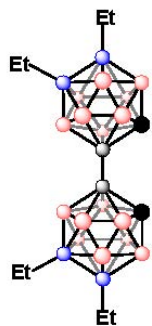

65.62  
56.33  
13.51  
13.41  
8.50



Current Data Parameters  
 NAME kk-1-210 tebcb  
 EXPNO 11  
 PROCNO 1

F2 - Acquisition Parameters  
 Date\_ 20151012  
 Time 18.10  
 INSTRUM av500  
 PROBHD 5 mm DCH 13C-1  
 PULPROG zgpg30  
 TD 65536  
 SOLVENT CDC13  
 NS 1024  
 DS 2  
 SWH 31250.000 Hz  
 FIDRES 0.476837 Hz  
 AQ 1.0485760 sec  
 RG 204.54  
 DW 16.000 usec  
 DE 18.00 usec  
 TE 298.0 K  
 D1 2.00000000 sec  
 D11 0.03000000 sec  
 TD0 1

==== CHANNEL f1 =====  
 SFO1 125.7722511 MHz  
 NUC1 13C  
 P1 9.63 usec  
 PLW1 23.00000000 W

==== CHANNEL f2 =====  
 SFO2 500.1330008 MHz  
 NUC2 1H  
 CPDPRG[2] waltz16  
 PCPD2 80.00 usec  
 PLW2 13.50000000 W  
 PLW12 0.21094000 W  
 PLW13 0.13500001 W

F2 - Processing parameters  
 SI 131072  
 SF 125.7577716 MHz  
 WDW EM  
 SSB 0  
 LB 1.00 Hz  
 GB 0  
 PC 1.40

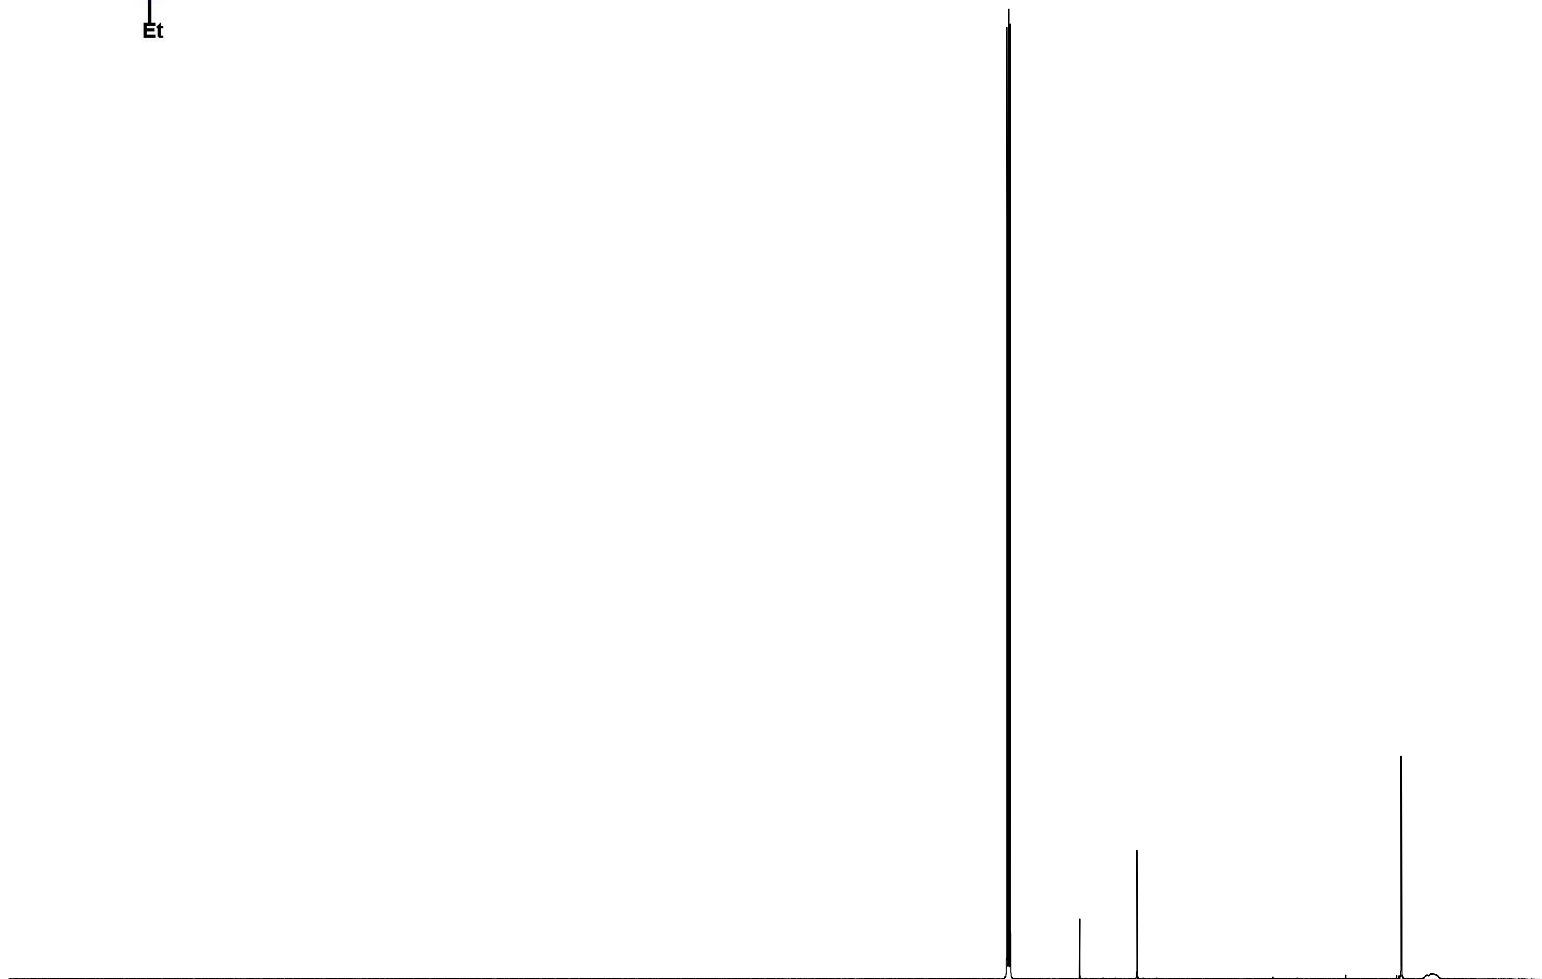

220 200 180 160 140 120 100 80 60 40 20 ppm

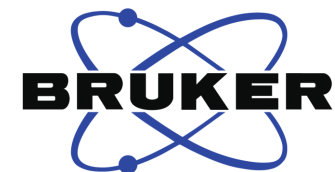

Current Data Parameters  
NAME kk-1-232 pt (tebc) (dtb-bpy)  
EXPNO 10  
PROCNO 1

F2 - Acquisition Parameters  
Date\_ 20150922  
Time 11.09  
INSTRUM av500  
PROBHD 5 mm DCH 13C-1  
PULPROG zg30  
TD 65536  
SOLVENT CD2Cl2  
NS 64  
DS 0  
SWH 10000.000 Hz  
FIDRES 0.152588 Hz  
AQ 3.2767999 sec  
RG 12.14  
DW 50.000 usec  
DE 10.00 usec  
TE 298.0 K  
D1 2.0000000 sec  
TD0 1

==== CHANNEL f1 =====  
SF01 500.1330008 MHz  
NUC1 1H  
P1 10.00 usec  
PLW1 13.50000000 W

F2 - Processing parameters  
SI 65536  
SF 500.1300194 MHz  
WDW EM  
SSB 0  
LB 0.30 Hz  
GB 0  
PC 1.00

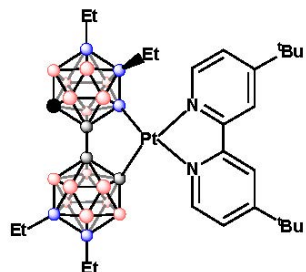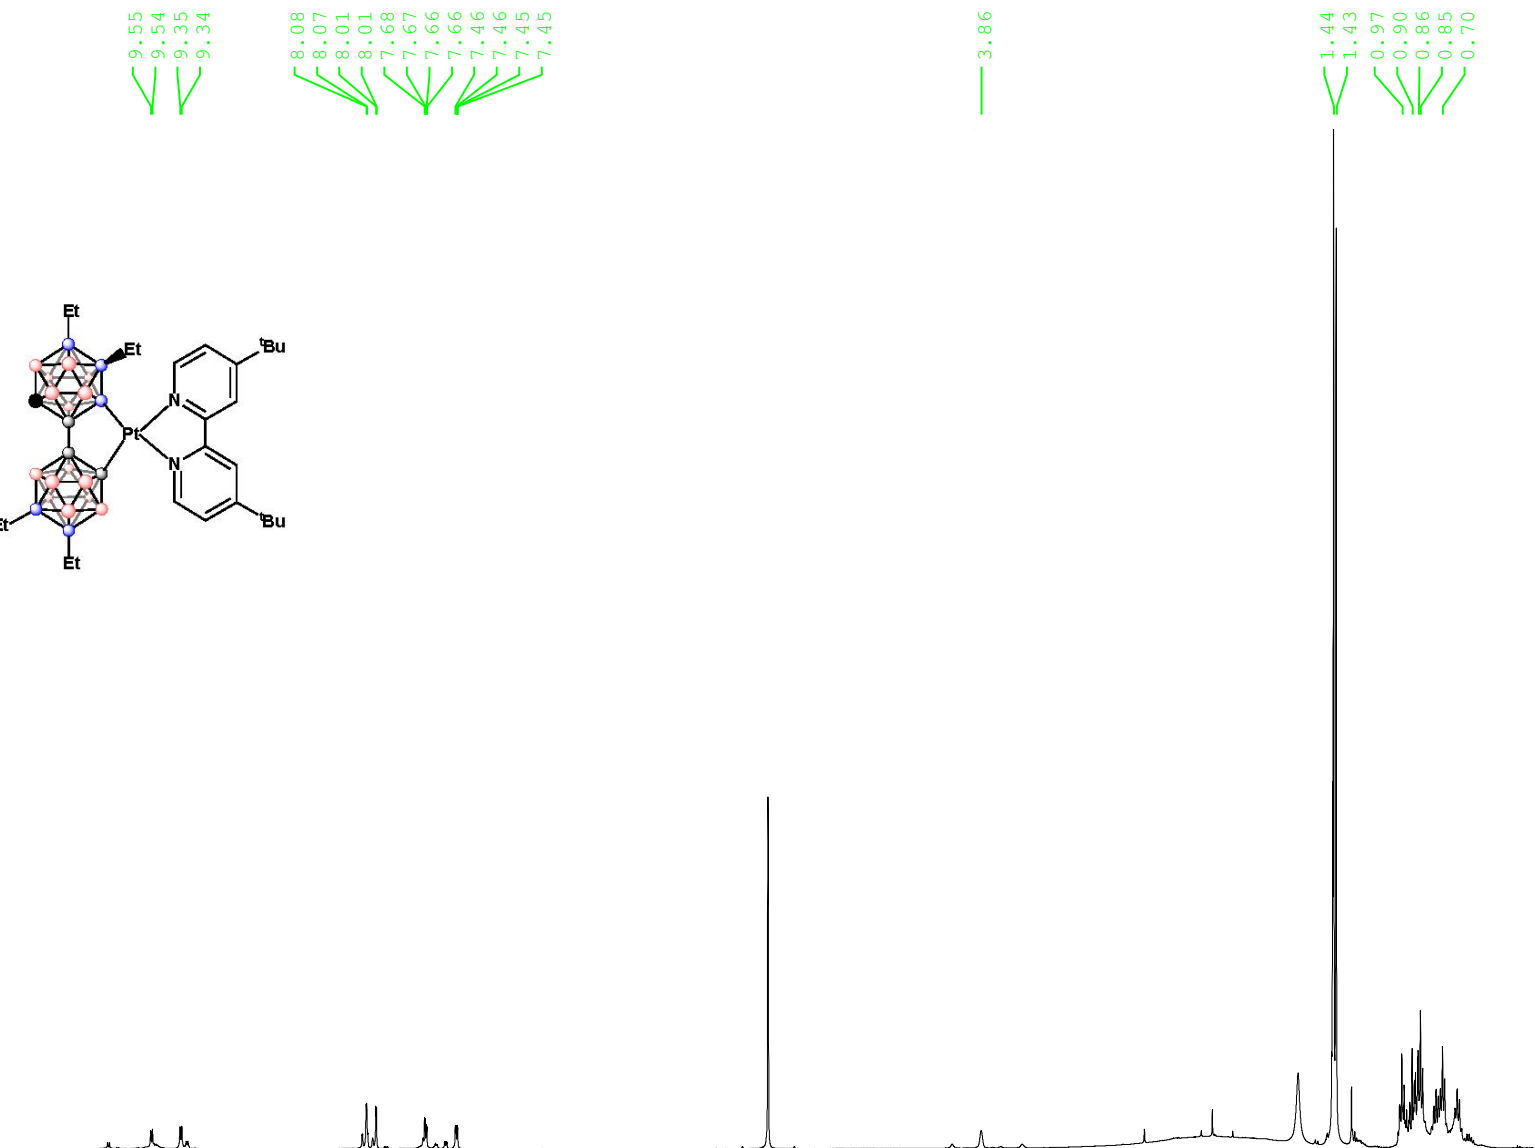

9.55  
9.54  
9.35  
9.34  
8.08  
8.07  
8.01  
8.01  
7.68  
7.67  
7.66  
7.66  
7.46  
7.46  
7.45  
7.45

3.86

1.44  
1.43  
0.97  
0.90  
0.86  
0.85  
0.70

10 9 8 7 6 5 4 3 2 1 ppm

1.06  
0.97

1.19  
1.14  
1.02  
0.89

1.00

23.00

23.64

14.31  
15.22



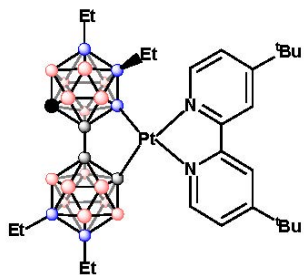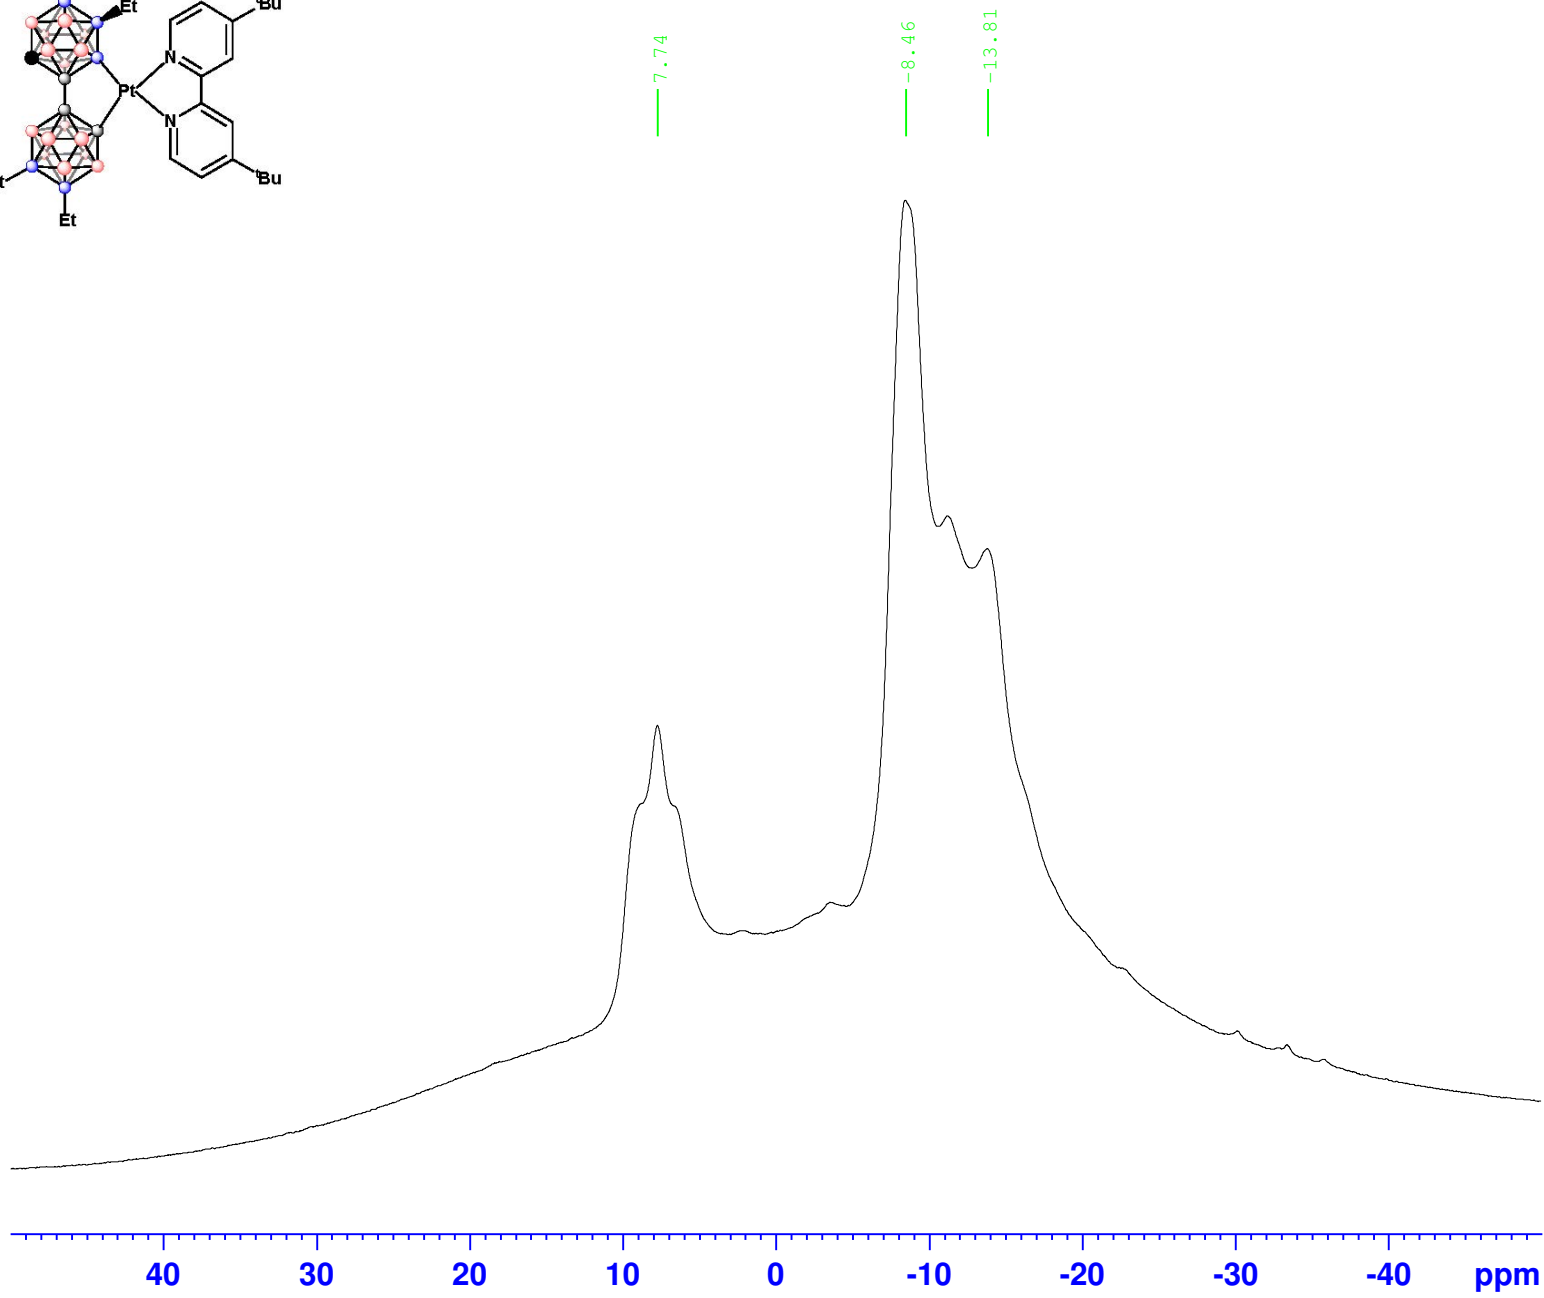

7.74  
8.46  
13.81

3.88  
16.12

```

Current Data Parameters
NAME      KK-1-232 Pt (tebc) (dtb-bpy) pure 11B
EXPNO     1
PROCNO    1

F2 - Acquisition Parameters
Date_     20150922
Time      14.05
INSTRUM   drx500
PROBHD    5 mm bb-Z Z800
PULPROG   zgdc
TD        7168
SOLVENT   CD2Cl2
NS        4096
DS        4
SWH       64102.562 Hz
FIDRES    8.942880 Hz
AQ        0.0559104 sec
RG        574.7
DW        7.800 usec
DE        6.00 usec
TE        297.2 K
D1        0.00000400 sec
d11       0.03000000 sec
TD0       1

===== CHANNEL f1 =====
NUC1      11B
P1        8.00 usec
PL1       -2.00 dB
SFO1      160.5257136 MHz

===== CHANNEL f2 =====
CPDPRG[2] waltz16
NUC2      1H
PCPD2     100.00 usec
PL2       0 dB
PL12      17.52 dB
SFO2      500.3330020 MHz

F2 - Processing parameters
SI        32768
SF        160.5257717 MHz
WDW       EM
SSB       0
LB        10.00 Hz
GB        0
PC        1.40

```

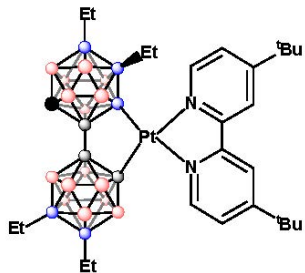

164.12  
163.58  
157.21  
155.85  
155.18  
149.79

123.99  
123.80  
123.77  
120.01  
119.17

35.98  
35.90  
30.36  
30.23

13.95  
13.71  
13.57  
13.51  
9.85  
8.36

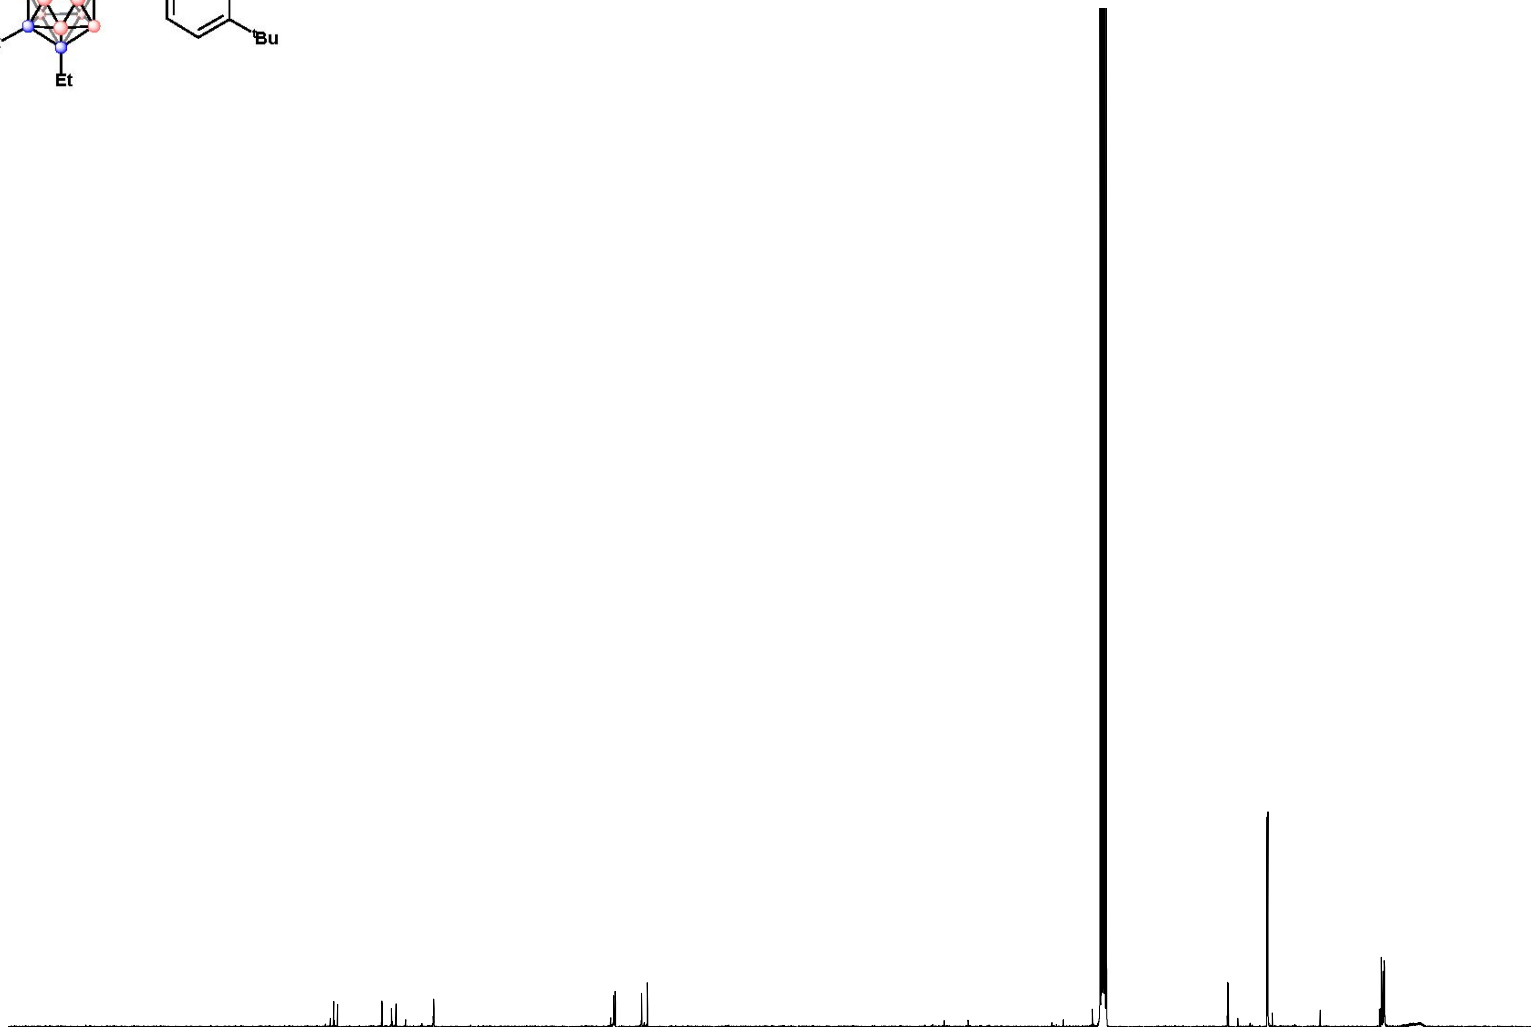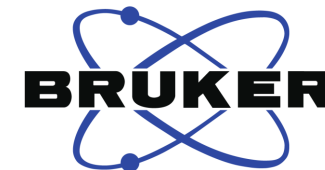

Current Data Parameters  
NAME kk-1-232 pt (tebc) (dtb-bpy)  
EXPNO 11  
PROCNO 1

F2 - Acquisition Parameters  
Date\_ 20150922  
Time 12.03  
INSTRUM av500  
PROBHD 5 mm DCH 13C-1  
PULPROG zgpg30  
TD 65536  
SOLVENT CD2Cl2  
NS 1024  
DS 2  
SWH 31250.000 Hz  
FIDRES 0.476837 Hz  
AQ 1.0485760 sec  
RG 204.54  
DW 16.000 usec  
DE 18.00 usec  
TE 298.0 K  
D1 2.00000000 sec  
D11 0.03000000 sec  
TD0 1

===== CHANNEL f1 =====  
SFO1 125.7722511 MHz  
NUC1 13C  
P1 9.63 usec  
PLW1 23.00000000 W

===== CHANNEL f2 =====  
SFO2 500.1330008 MHz  
NUC2 1H  
CPDPRG[2] waltz16  
PCPD2 80.00 usec  
PLW2 13.50000000 W  
PLW12 0.21094000 W  
PLW13 0.13500001 W

F2 - Processing parameters  
SI 131072  
SF 125.7577377 MHz  
WDW EM  
SSB 0  
LB 1.00 Hz  
GB 0  
PC 1.40

200 180 160 140 120 100 80 60 40 20 ppm

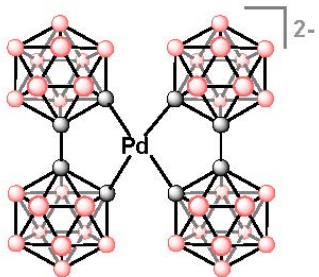

3.95  
3.91  
3.24  
3.22  
3.21  
3.19  
1.36  
1.36  
1.35  
1.35  
1.34  
1.34  
1.33  
1.33  
1.32



Current Data Parameters  
 NAME (TEA)2[Pd(bc)2] 1H:13C  
 EXPNO 10  
 PROCNO 1

F2 - Acquisition Parameters  
 Date\_ 20160126  
 Time 22.53  
 INSTRUM av500  
 PROBHD 5 mm DCH 13C-1  
 PULPROG zg30  
 TD 65536  
 SOLVENT CD2Cl2  
 NS 64  
 DS 0  
 SWH 10000.000 Hz  
 FIDRES 0.152588 Hz  
 AQ 3.2767999 sec  
 RG 12.14  
 DW 50.000 usec  
 DE 10.00 usec  
 TE 298.0 K  
 D1 2.00000000 sec  
 TD0 1

==== CHANNEL f1 =====  
 SFO1 500.1330008 MHz  
 NUC1 1H  
 P1 10.00 usec  
 PLW1 13.50000000 W

F2 - Processing parameters  
 SI 65536  
 SF 500.1300194 MHz  
 WDW EM  
 SSB 0  
 LB 0.30 Hz  
 GB 0  
 PC 1.00

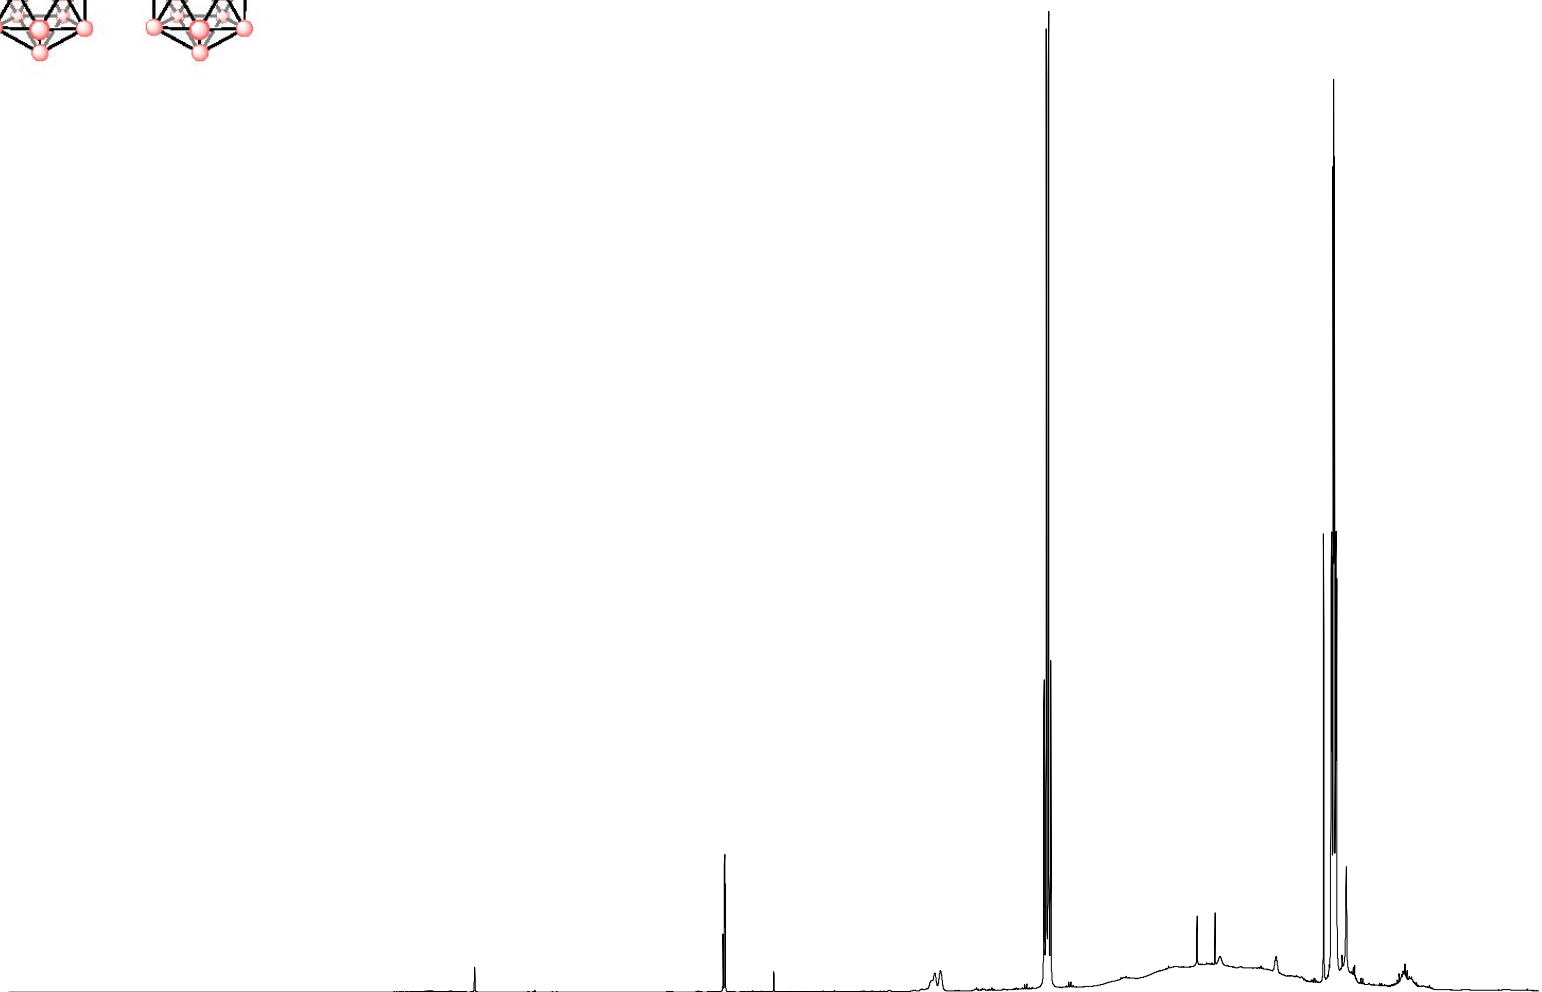

9 8 7 6 5 4 3 2 1 ppm

16.00  
42.96  
24.08

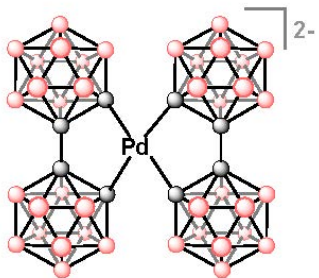

-0.98  
 -1.86  
 -2.72  
 -3.67  
 -8.34  
 -9.31  
 -10.32  
 -11.45  
 -12.51  
 -16.40  
 -17.25  
 -21.63  
 -22.54  
 -32.43  
 -33.00  
 -34.66  
 -35.53



Current Data Parameters  
 NAME KK-2-022 [Pd(bc)2]2- 11B  
 EXPNO 3  
 PROCNO 1

F2 - Acquisition Parameters  
 Date\_ 20160208  
 Time\_ 18.23  
 INSTRUM drx500  
 PROBHD 5 mm bb-Z Z800  
 PULPROG zgdc  
 TD 7168  
 SOLVENT CD2Cl2  
 NS 8192  
 DS 4  
 SWH 64102.562 Hz  
 FIDRES 8.942880 Hz  
 AQ 0.0559104 sec  
 RG 287.4  
 DW 7.800 usec  
 DE 6.00 usec  
 TE 297.0 K  
 D1 0.00000400 sec  
 d11 0.03000000 sec  
 TD0 1

===== CHANNEL f1 =====  
 NUC1 11B  
 P1 8.00 usec  
 PL1 -2.00 dB  
 SFO1 160.5257140 MHz

===== CHANNEL f2 =====  
 CPDPRG[2] waltz16  
 NUC2 off  
 PCPD2 100.00 usec  
 PL2 0 dB  
 PL12 17.52 dB  
 SFO2 500.3300000 MHz

F2 - Processing parameters  
 SI 32768  
 SF 160.5256716 MHz  
 WDW EM  
 SSB 0  
 LB 10.00 Hz  
 GB 0  
 PC 1.40

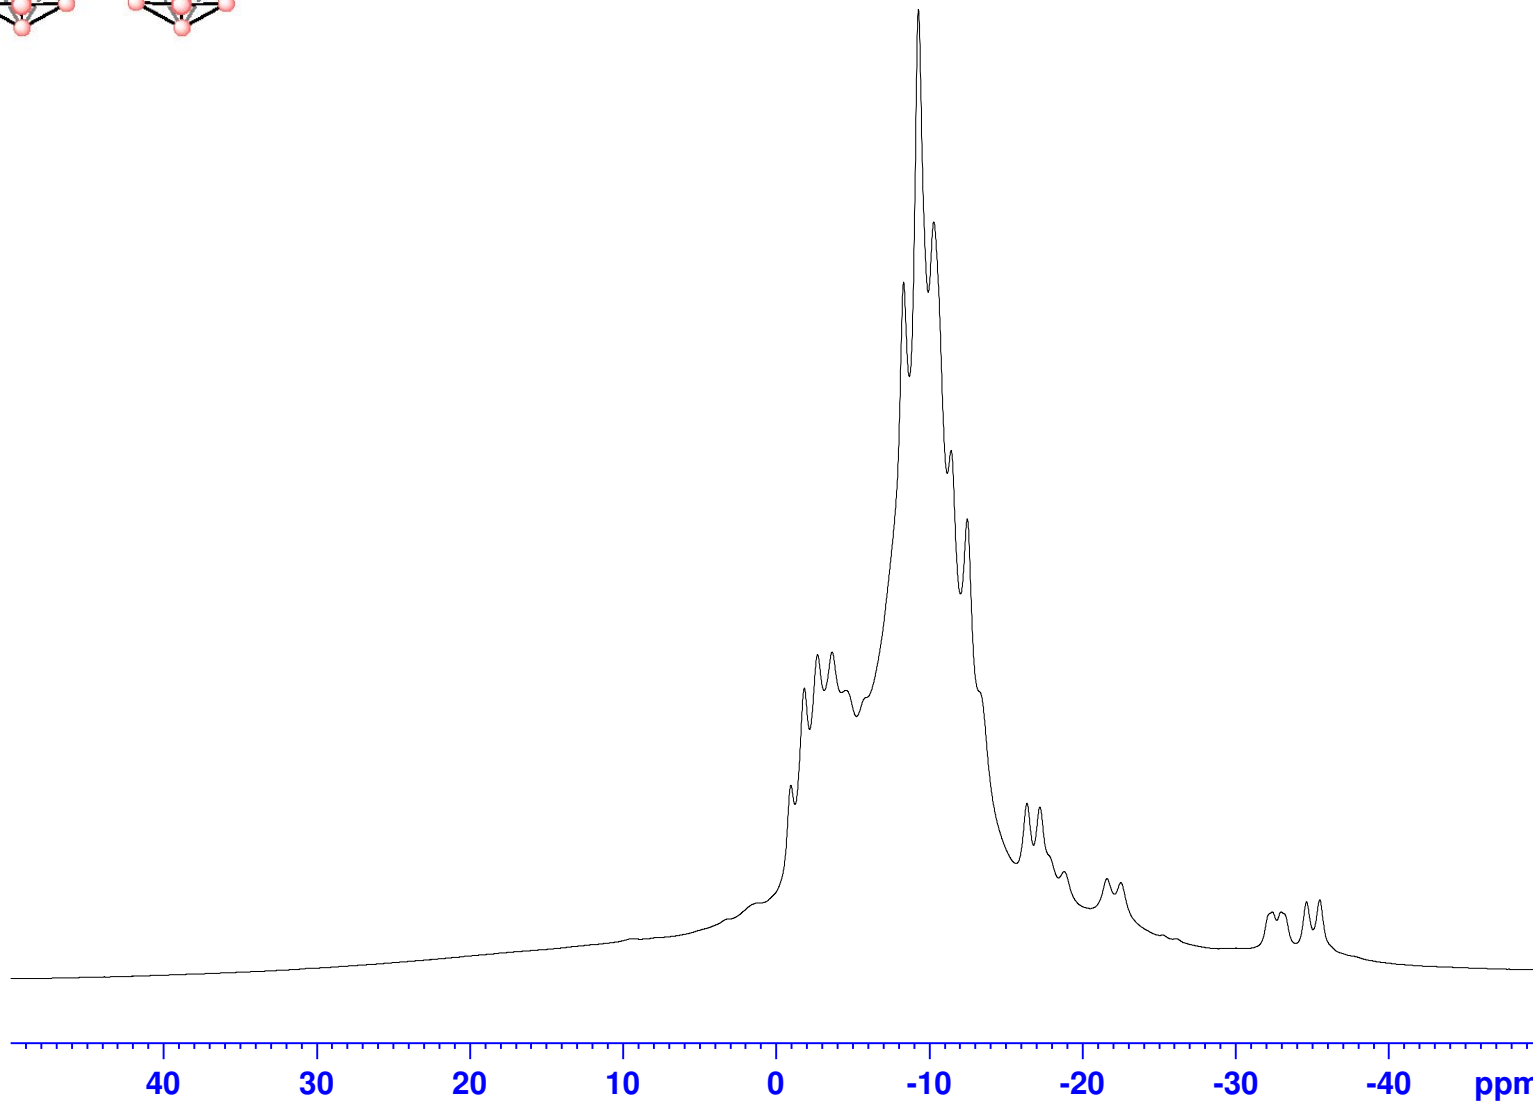

9.02  
 25.96  
 4.11  
 0.90

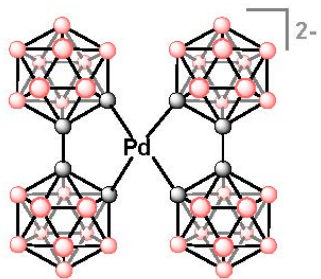

-1.46  
 -2.19  
 -3.27  
 -5.29  
 -8.81  
 -9.89  
 -12.03  
 -12.92  
 -16.84  
 -18.40  
 -22.11  
 -32.73  
 -35.12



Current Data Parameters  
 NAME KK-2-022 [Pd(bc)2]<sub>2</sub><sup>2-</sup> 11B  
 EXPNO 2  
 PROCNO 1

F2 - Acquisition Parameters  
 Date\_ 20160208  
 Time\_ 18.05  
 INSTRUM drx500  
 PROBHD 5 mm bb-Z Z800  
 PULPROG zgdc  
 TD 7168  
 SOLVENT CD2Cl2  
 NS 4096  
 DS 4  
 SWH 64102.562 Hz  
 FIDRES 8.942880 Hz  
 AQ 0.0559104 sec  
 RG 574.7  
 DW 7.800 usec  
 DE 6.00 usec  
 TE 297.2 K  
 D1 0.00000400 sec  
 d11 0.03000000 sec  
 TDO 1

===== CHANNEL f1 =====  
 NUC1 11B  
 P1 8.00 usec  
 PL1 -2.00 dB  
 SFO1 160.5257136 MHz

===== CHANNEL f2 =====  
 CPDPRG[2] waltz16  
 NUC2 1H  
 PCPD2 100.00 usec  
 PL2 0 dB  
 PL12 17.52 dB  
 SFO2 500.3330020 MHz

F2 - Processing parameters  
 SI 32768  
 SF 160.5256716 MHz  
 WDW EM  
 SSB 0  
 LB 10.00 Hz  
 GB 0  
 PC 1.40

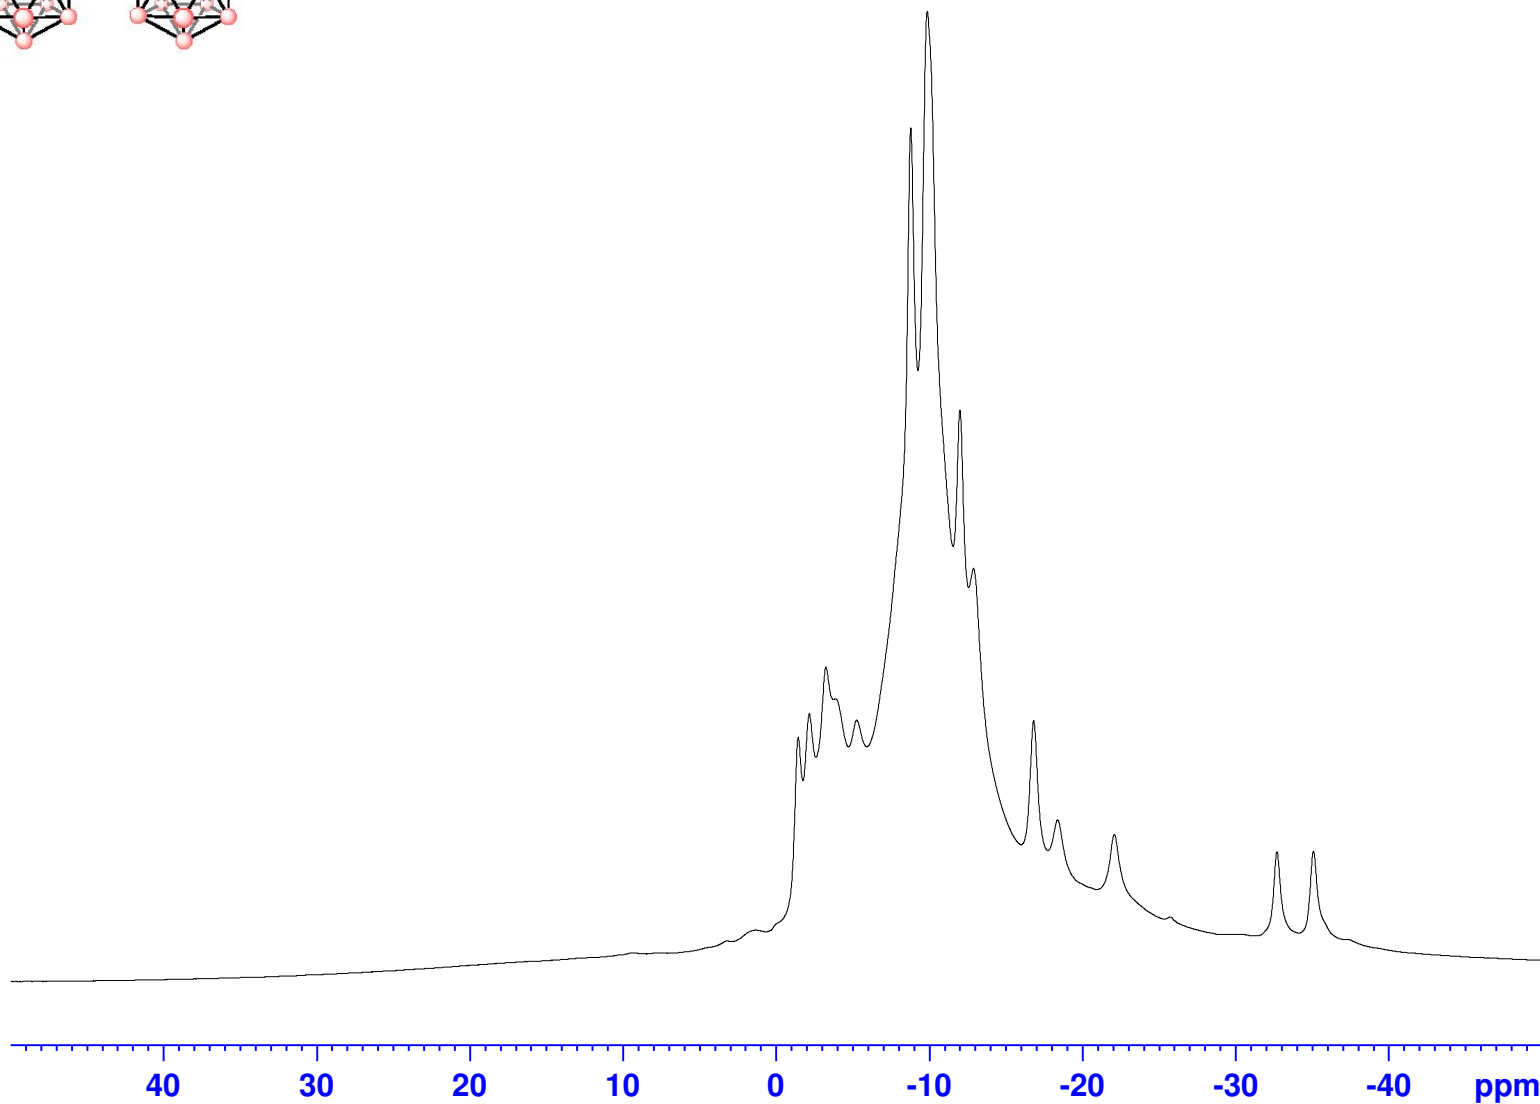

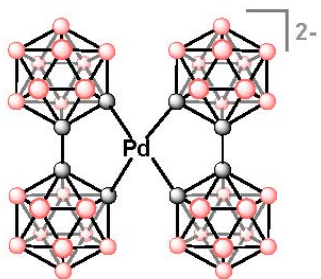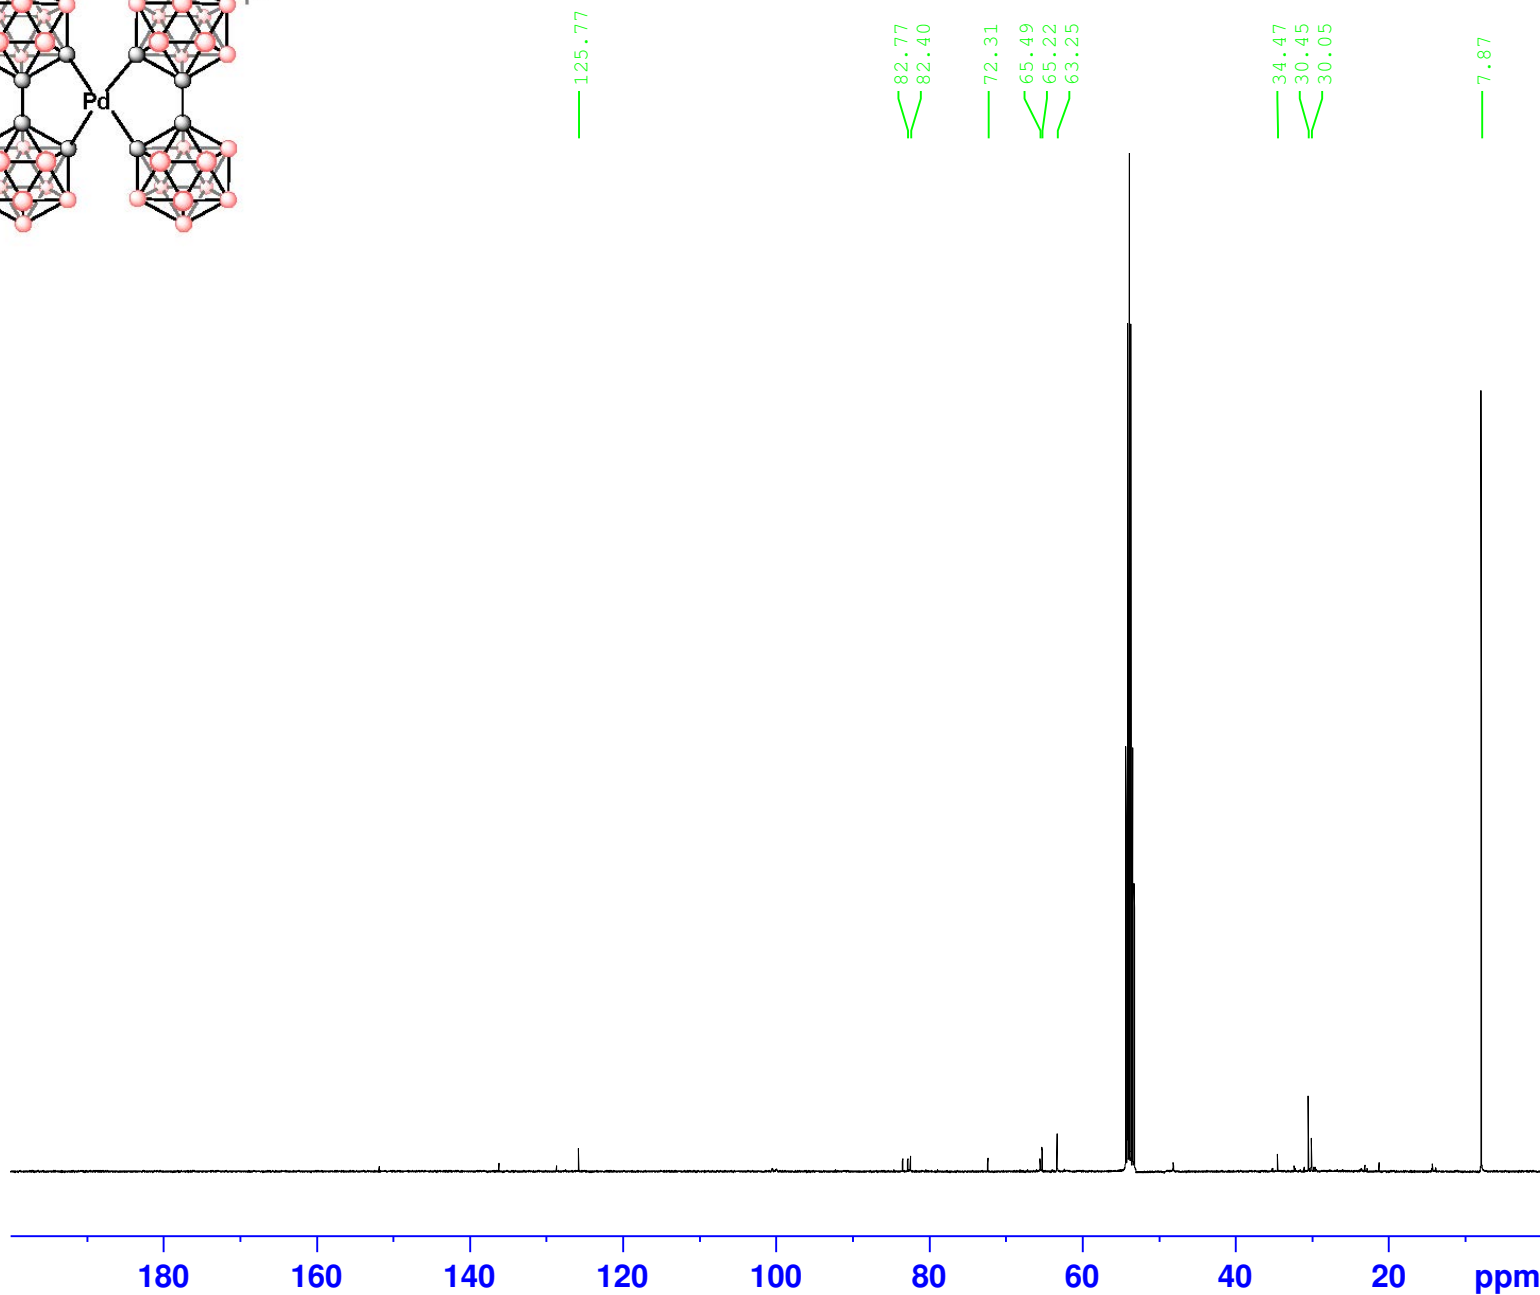

Current Data Parameters  
 NAME (TEA)2[Pd(bc)2] 1H:13C  
 EXPNO 11  
 PROCNO 1

F2 - Acquisition Parameters  
 Date\_ 20160126  
 Time 23.50  
 INSTRUM av500  
 PROBHD 5 mm DCH 13C-1  
 PULPROG zgpg30  
 TD 65536  
 SOLVENT CD2Cl2  
 NS 1024  
 DS 2  
 SWH 31250.000 Hz  
 FIDRES 0.476837 Hz  
 AQ 1.0485760 sec  
 RG 204.54  
 DW 16.000 usec  
 DE 18.00 usec  
 TE 298.0 K  
 D1 2.00000000 sec  
 D11 0.03000000 sec  
 TD0 1

===== CHANNEL f1 =====  
 SFO1 125.7722511 MHz  
 NUC1 13C  
 P1 9.63 usec  
 PLW1 23.00000000 W

===== CHANNEL f2 =====  
 SFO2 500.1330008 MHz  
 NUC2 1H  
 CPDPRG[2] waltz16  
 PCPD2 80.00 usec  
 PLW2 13.50000000 W  
 PLW12 0.21094000 W  
 PLW13 0.13500001 W

F2 - Processing parameters  
 SI 131072  
 SF 125.7577413 MHz  
 WDW EM  
 SSB 0  
 LB 1.00 Hz  
 GB 0  
 PC 1.40

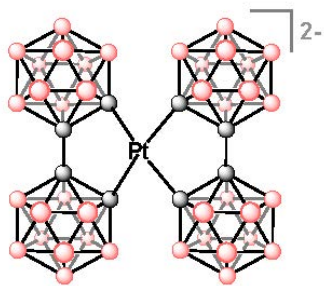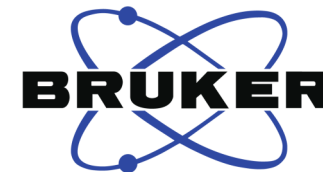

3.96  
3.91  
3.22  
3.21  
3.19  
3.18  
1.37  
1.36  
1.36  
1.35  
1.35  
1.34  
1.34  
1.33  
1.33

Current Data Parameters  
 NAME KK-2-017 Pt(bc)2 vac dried  
 EXPNO 10  
 PROCNO 1

F2 - Acquisition Parameters  
 Date\_ 20160205  
 Time 17.10  
 INSTRUM av500  
 PROBHD 5 mm DCH 13C-1  
 PULPROG zg30  
 TD 65536  
 SOLVENT CD2C12  
 NS 64  
 DS 0  
 SWH 10000.000 Hz  
 FIDRES 0.152588 Hz  
 AQ 3.2767999 sec  
 RG 12.14  
 DW 50.000 usec  
 DE 10.00 usec  
 TE 298.0 K  
 D1 2.0000000 sec  
 TD0 1

==== CHANNEL f1 =====  
 SF01 500.1330008 MHz  
 NUC1 1H  
 P1 10.00 usec  
 PLW1 13.5000000 W

F2 - Processing parameters  
 SI 65536  
 SF 500.1300193 MHz  
 WDW EM  
 SSB 0  
 LB 0.30 Hz  
 GB 0  
 PC 1.00

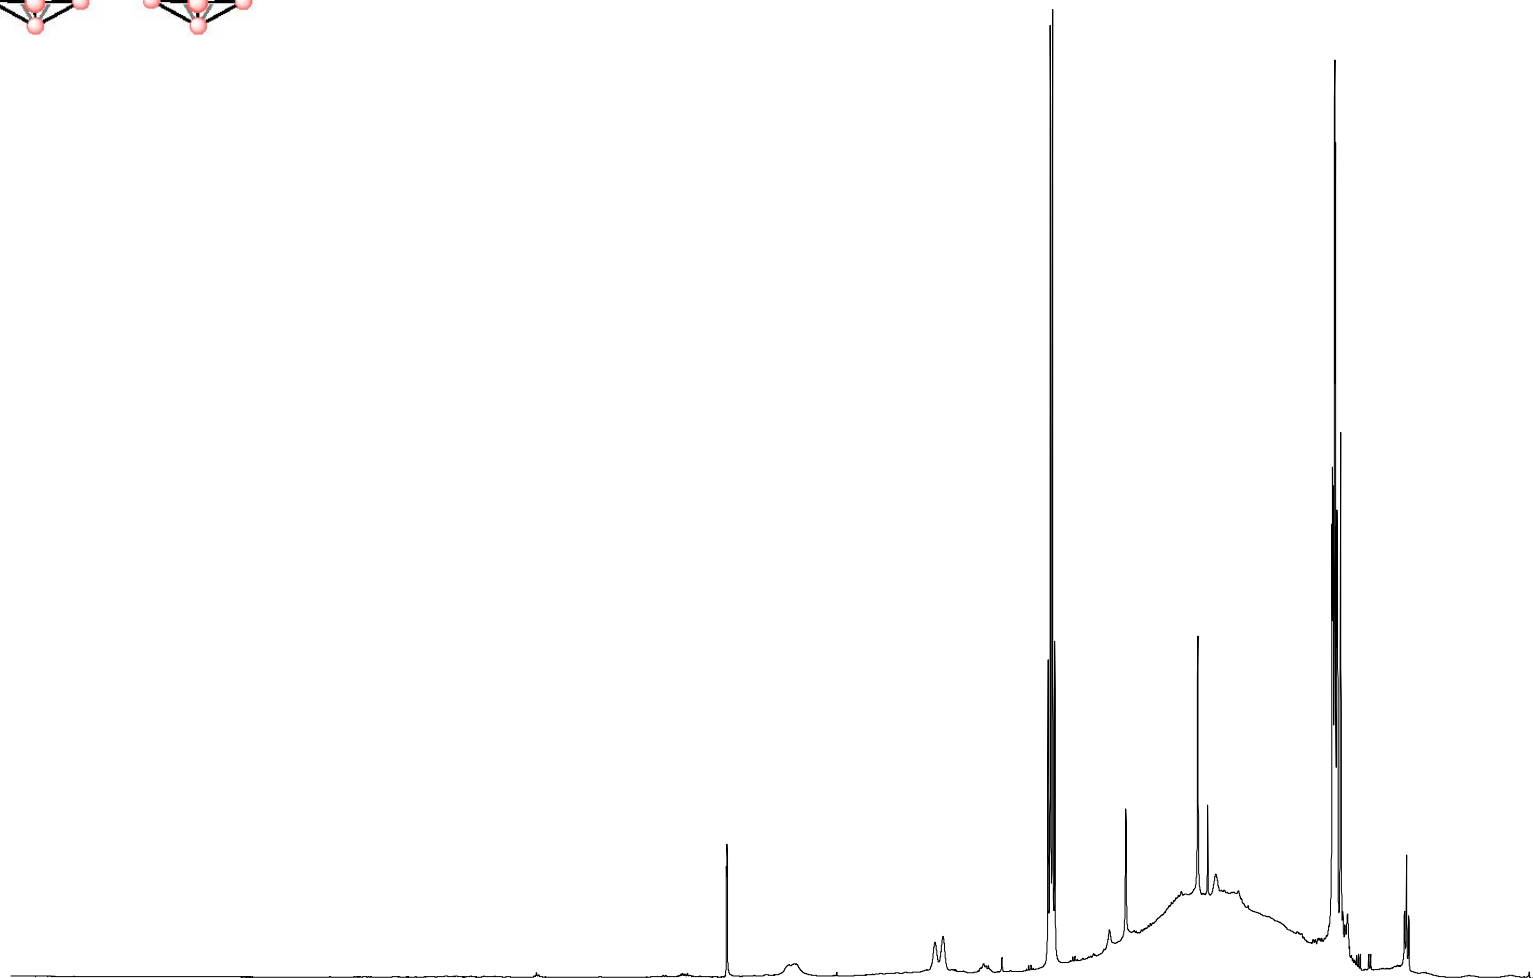

9 8 7 6 5 4 3 2 1 ppm

8.00  
50.16  
12.41

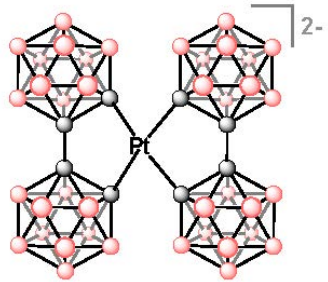

-1.11  
 -1.98  
 -2.84  
 -3.82  
 -4.91  
 -8.47  
 -9.45  
 -10.46  
 -11.58  
 -12.64  
 -16.51  
 -17.35  
 -21.76  
 -22.67  
 -32.56  
 -33.13  
 -34.79  
 -35.66



Current Data Parameters  
 NAME KK-2-017 [Pt(bc)2]2- 11B  
 EXPNO 3  
 PROCNO 1

F2 - Acquisition Parameters  
 Date\_ 20160206  
 Time 17.39  
 INSTRUM drx500  
 PROBHD 5 mm bb-Z Z800  
 PULPROG zgdc  
 TD 7168  
 SOLVENT CD2Cl2  
 NS 8192  
 DS 4  
 SWH 64102.562 Hz  
 FIDRES 8.942880 Hz  
 AQ 0.0559104 sec  
 RG 228.1  
 DW 7.800 usec  
 DE 6.00 usec  
 TE 296.8 K  
 D1 0.00000400 sec  
 d11 0.03000000 sec  
 TD0 1

===== CHANNEL f1 =====  
 NUC1 11B  
 P1 8.00 usec  
 PL1 -2.00 dB  
 SFO1 160.5257140 MHz

===== CHANNEL f2 =====  
 CPDPRG[2] waltz16  
 NUC2 off  
 PCPD2 100.00 usec  
 PL2 0 dB  
 PL12 17.52 dB  
 SFO2 500.3300000 MHz

F2 - Processing parameters  
 SI 32768  
 SF 160.5256909 MHz  
 WDW EM  
 SSB 0  
 LB 10.00 Hz  
 GB 0  
 PC 1.40

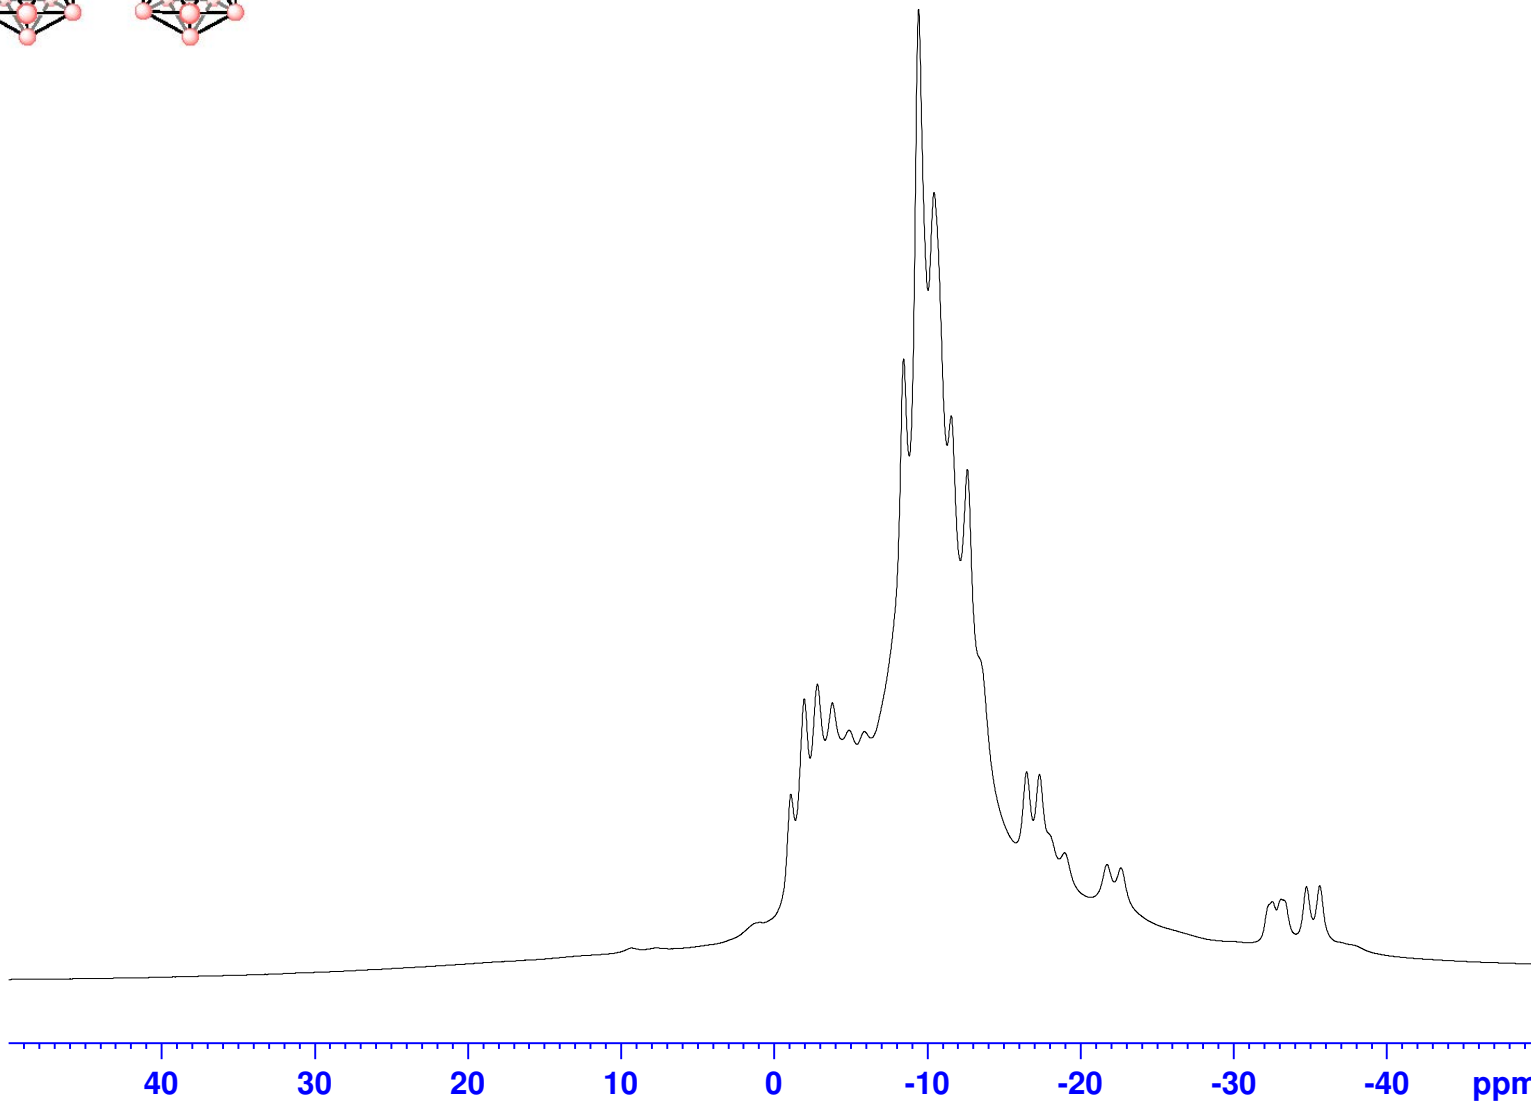

7.92  
 25.83  
 5.00  
 1.25



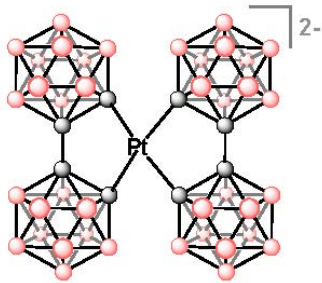

-1.58  
 -2.29  
 -3.37  
 -5.42  
 -8.94  
 -10.01  
 -12.15  
 -13.03  
 -16.94  
 -18.55  
 -22.23  
 -32.85  
 -35.23



Current Data Parameters  
 NAME KK-2-017 [Pt(bc)2]2- 11B  
 EXPNO 2  
 PROCNO 1

F2 - Acquisition Parameters  
 Date\_ 20160206  
 Time\_ 17.21  
 INSTRUM drx500  
 PROBHD 5 mm bb-Z Z800  
 PULPROG zgdc  
 TD 7168  
 SOLVENT CD2Cl2  
 NS 8192  
 DS 4  
 SWH 64102.562 Hz  
 FIDRES 8.942880 Hz  
 AQ 0.0559104 sec  
 RG 228.1  
 DW 7.800 usec  
 DE 6.00 usec  
 TE 297.1 K  
 D1 0.00000400 sec  
 d11 0.03000000 sec  
 TDO 1

===== CHANNEL f1 =====  
 NUC1 11B  
 P1 8.00 usec  
 PL1 -2.00 dB  
 SFO1 160.5257136 MHz

===== CHANNEL f2 =====  
 CPDPRG[2] waltz16  
 NUC2 1H  
 PCPD2 100.00 usec  
 PL2 0 dB  
 PL12 17.52 dB  
 SFO2 500.3330020 MHz

F2 - Processing parameters  
 SI 32768  
 SF 160.5256909 MHz  
 WDW EM  
 SSB 0  
 LB 10.00 Hz  
 GB 0  
 PC 1.40

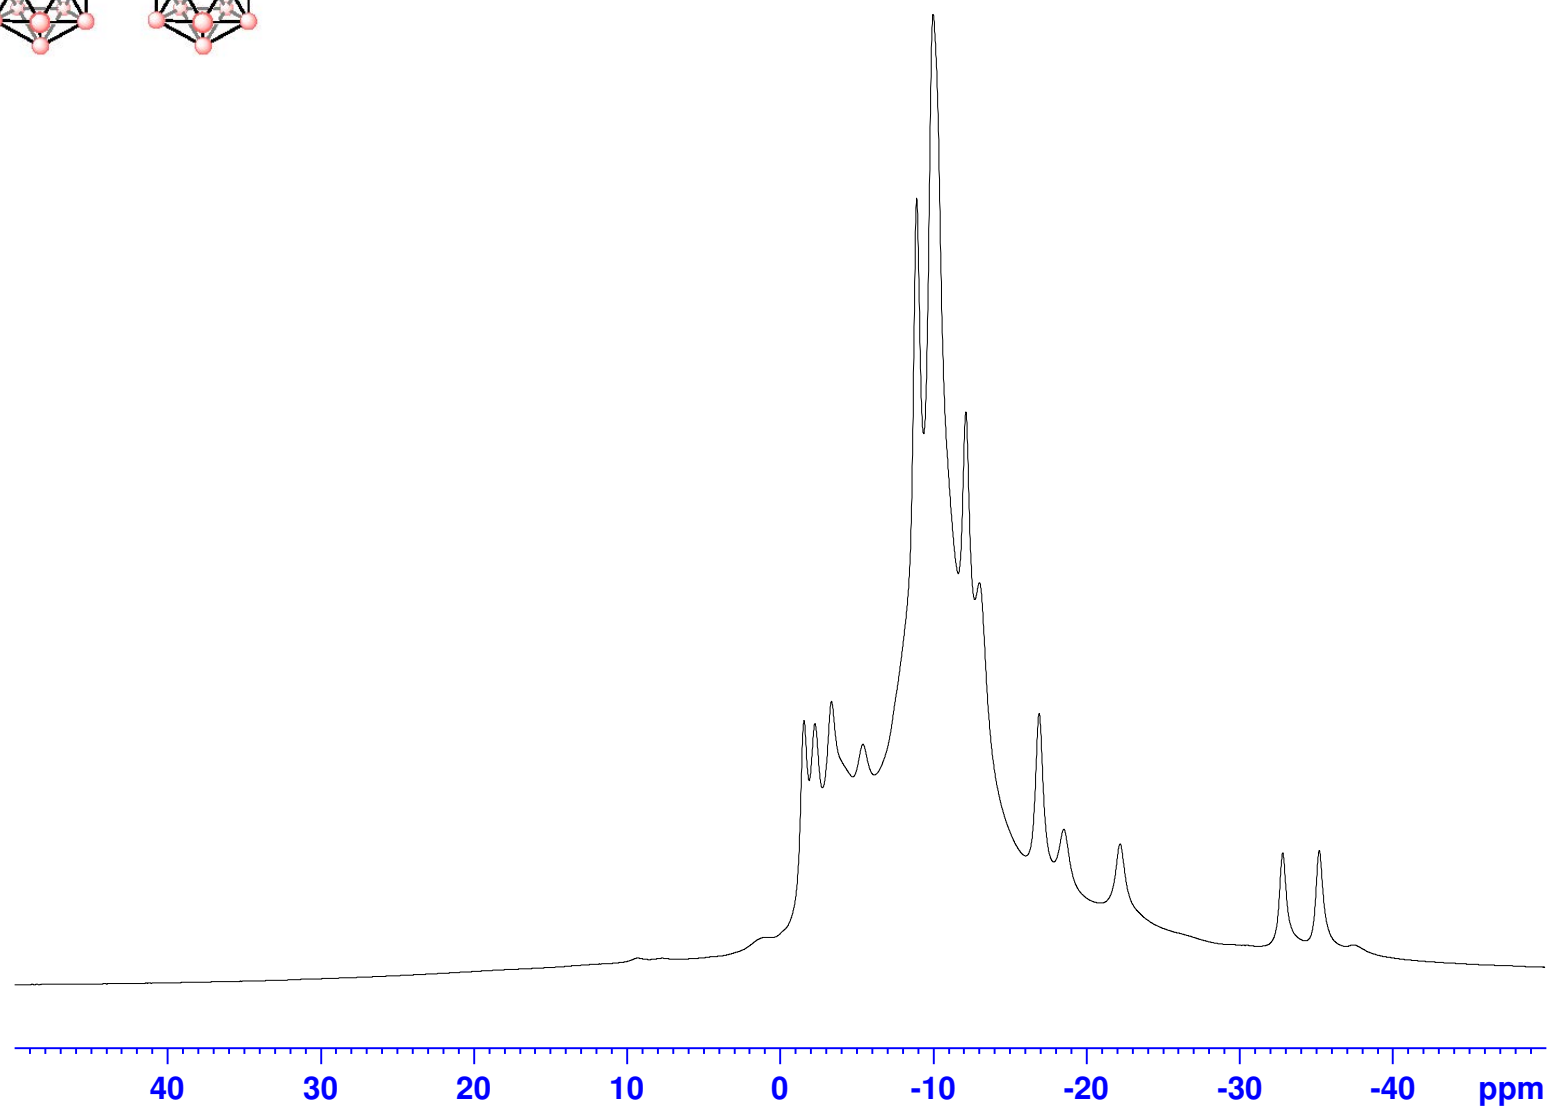

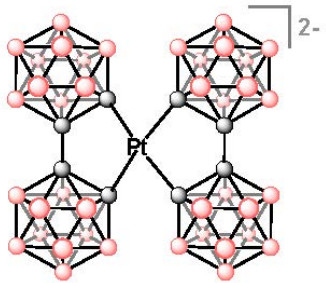

72.31  
71.22  
65.43  
63.26  
53.23  
53.21  
53.18  
29.89  
22.72  
14.21  
7.86



Current Data Parameters  
NAME KK-2-017 Pt(bc)2 vac dried  
EXPNO 11  
PROCNO 1

F2 - Acquisition Parameters  
Date\_ 20160205  
Time 18.06  
INSTRUM av500  
PROBHD 5 mm DCH 13C-1  
PULPROG zgpg30  
TD 65536  
SOLVENT CD2C12  
NS 1024  
DS 2  
SWH 31250.000 Hz  
FIDRES 0.476837 Hz  
AQ 1.0485760 sec  
RG 204.54  
DW 16.000 usec  
DE 18.00 usec  
TE 298.0 K  
D1 2.0000000 sec  
D11 0.0300000 sec  
TD0 1

===== CHANNEL f1 =====  
SFO1 125.7722511 MHz  
NUC1 13C  
P1 9.63 usec  
PLW1 23.0000000 W

===== CHANNEL f2 =====  
SFO2 500.1330008 MHz  
NUC2 1H  
CPDPRG[2] waltz16  
PCPD2 80.00 usec  
PLW2 13.5000000 W  
PLW12 0.21094000 W  
PLW13 0.13500001 W

F2 - Processing parameters  
SI 131072  
SF 125.7577397 MHz  
WDW EM  
SSB 0  
LB 1.00 Hz  
GB 0  
PC 1.40

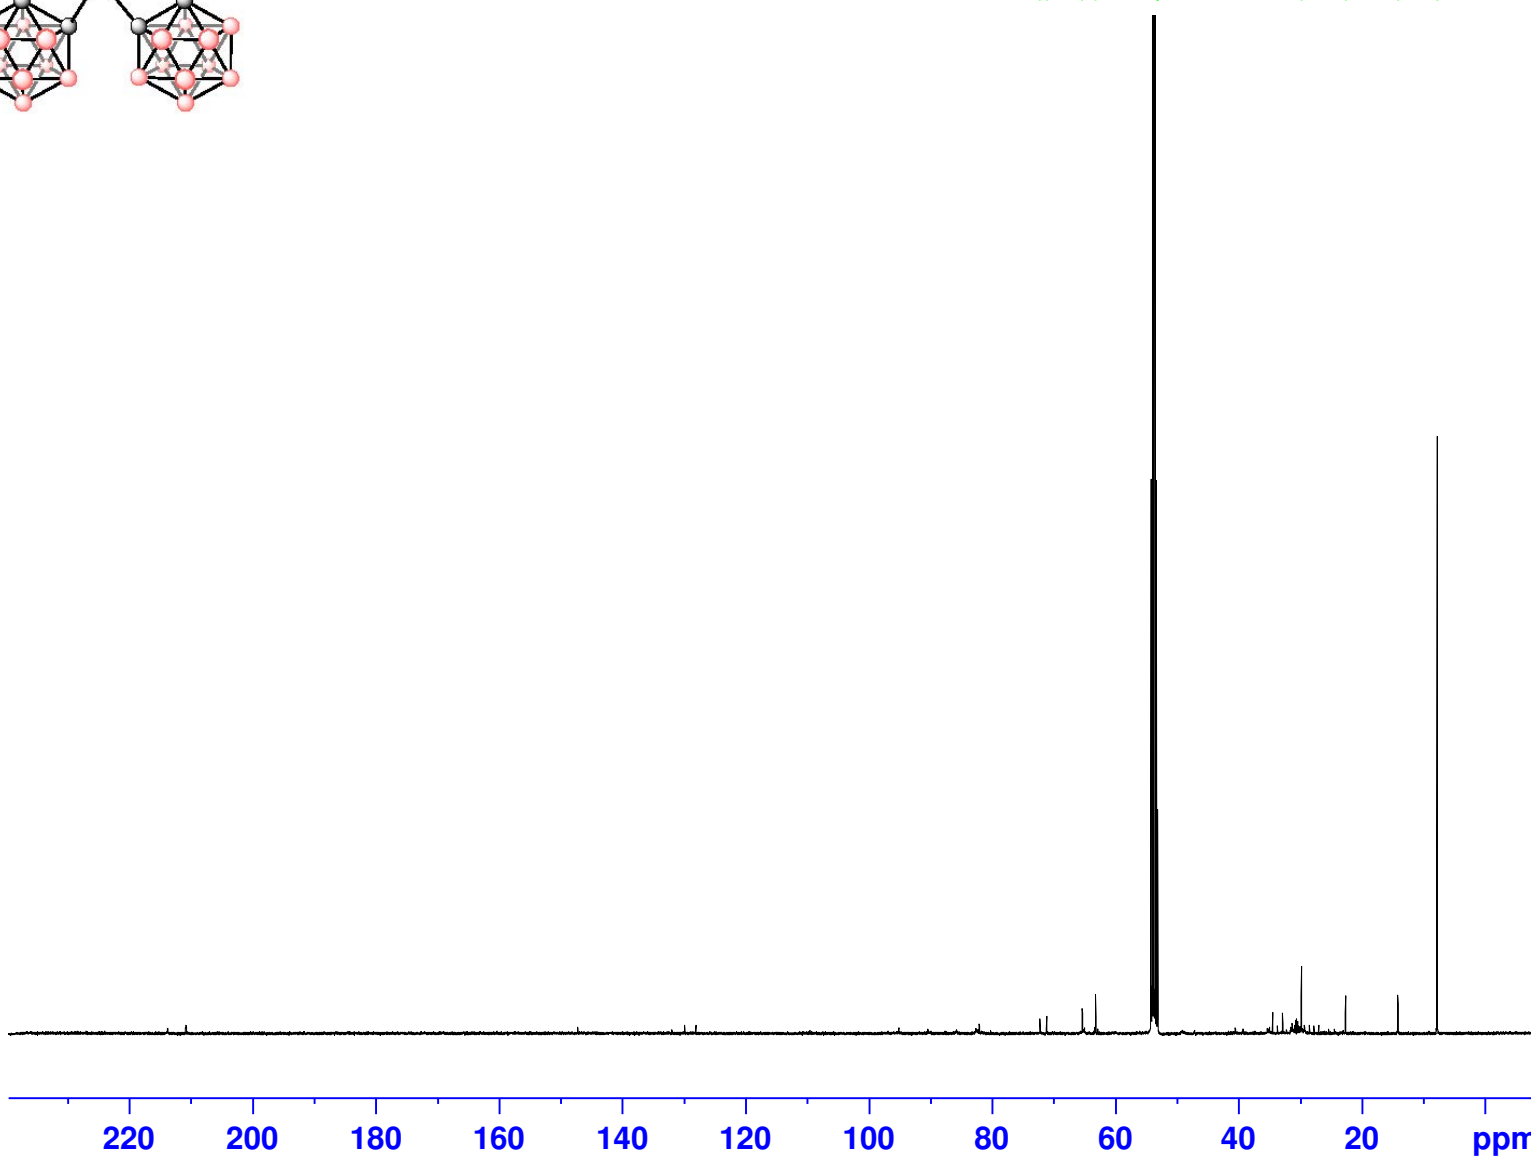

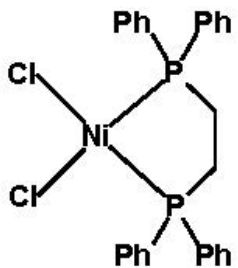

7.99  
7.98

7.61  
7.53

2.17  
2.12



Current Data Parameters  
 NAME Ni (dppf)Cl2  
 EXPNO 170  
 PROCNO 1

F2 - Acquisition Parameters

Date\_ 20150327  
 Time 12.57  
 INSTRUM av400  
 PROBHD 5 mm PABBO BB/  
 PULPROG zg30  
 TD 52882  
 SOLVENT CD2Cl2  
 NS 64  
 DS 0  
 SWH 8012.820 Hz  
 FIDRES 0.151523 Hz  
 AQ 3.2998369 sec  
 RG 155.85  
 DW 62.400 usec  
 DE 6.50 usec  
 TE 299.1 K  
 D1 2.00000000 sec  
 TD0 1

==== CHANNEL f1 =====  
 SFO1 400.1324008 MHz  
 NUC1 1H  
 P1 15.00 usec  
 PLW1 13.00000000 W

F2 - Processing parameters

SI 65536  
 SF 400.1300154 MHz  
 WDW EM  
 SSB 0  
 LB 0.30 Hz  
 GB 0  
 PC 1.00

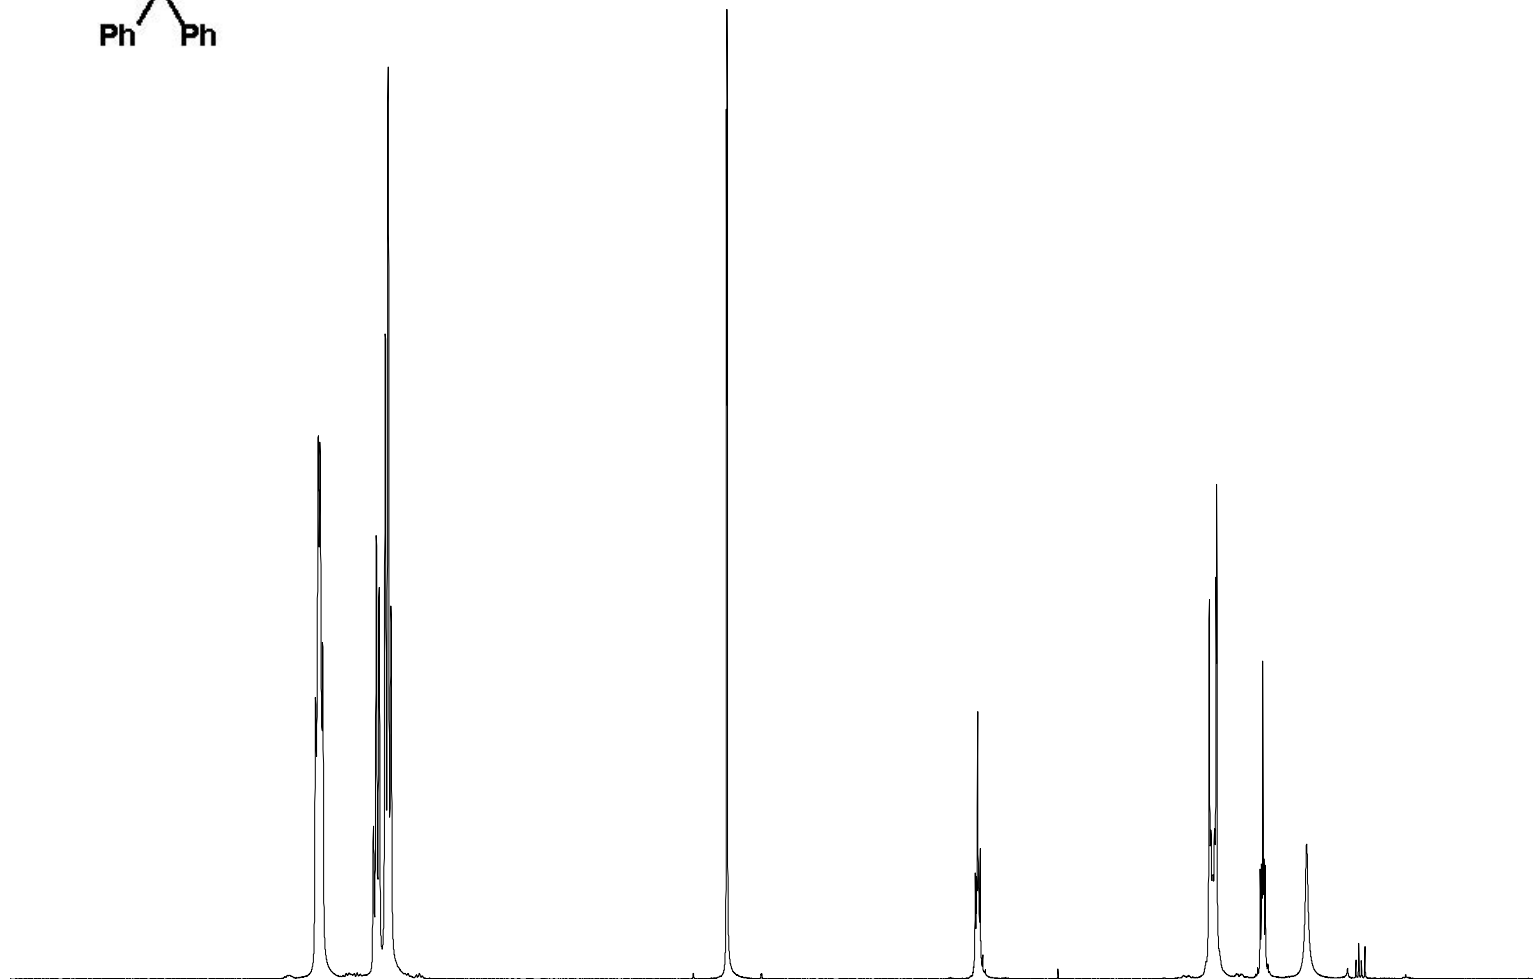

7.93  
3.95  
8.00

4.02

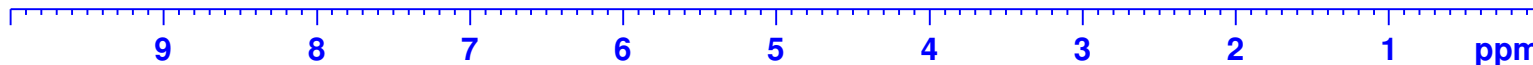

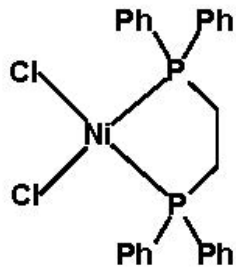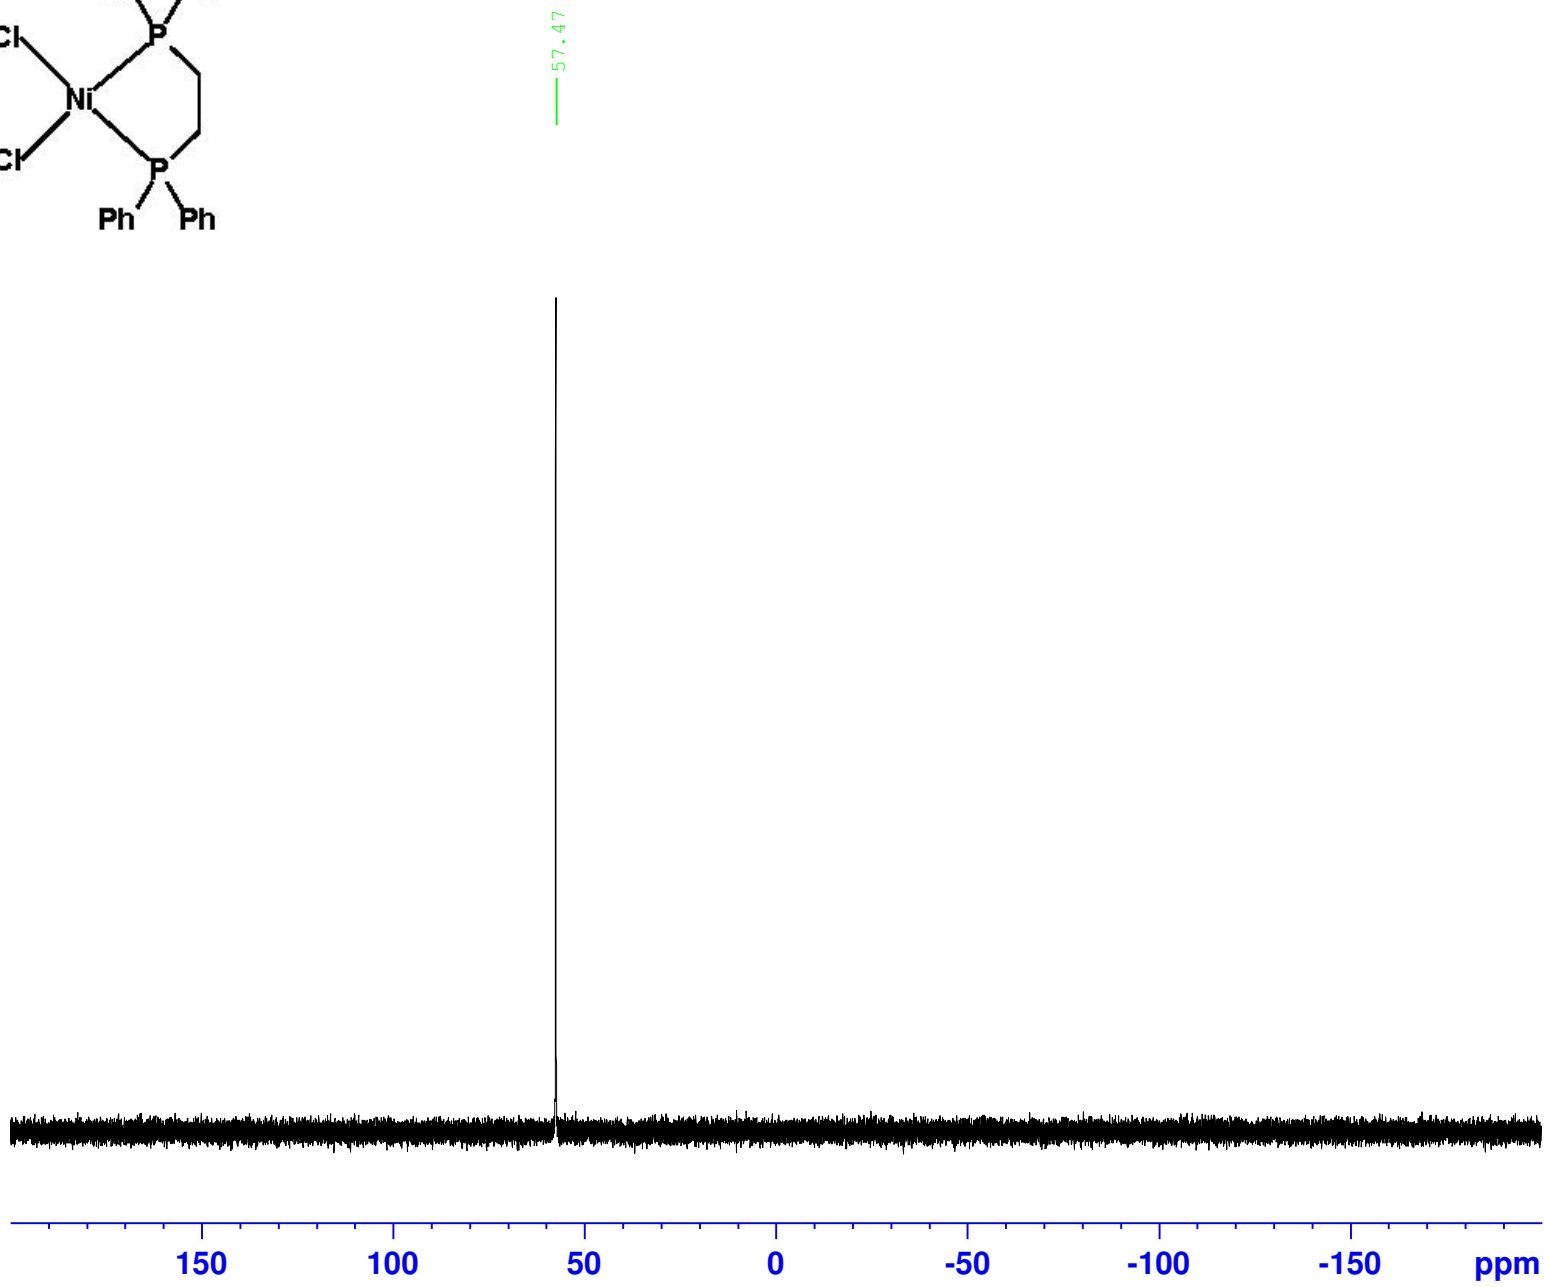

Current Data Parameters  
 NAME Ni (dppe)Cl2  
 EXPNO 171  
 PROCNO 1

F2 - Acquisition Parameters  
 Date\_ 20150327  
 Time 13.02  
 INSTRUM av400  
 PROBHD 5 mm PABBO BB/  
 PULPROG zgpg30  
 TD 262144  
 SOLVENT CD2Cl2  
 NS 80  
 DS 0  
 SWH 131578.953 Hz  
 FIDRES 0.501934 Hz  
 AQ 0.9961472 sec  
 RG 189.85  
 DW 3.800 usec  
 DE 6.50 usec  
 TE 300.1 K  
 D1 2.0000000 sec  
 D11 0.03000000 sec  
 TD0 1

==== CHANNEL f1 =====  
 SFO1 161.9755930 MHz  
 NUC1 31P  
 P1 14.00 usec  
 PLW1 12.00000000 W

==== CHANNEL f2 =====  
 SFO2 400.1324008 MHz  
 NUC2 1H  
 CPDPRG[2] waltz16  
 PCPD2 90.00 usec  
 PLW2 13.00000000 W  
 PLW12 0.36111000 W  
 PLW13 0.29249999 W

F2 - Processing parameters  
 SI 262144  
 SF 161.9755930 MHz  
 WDW EM  
 SSB 0  
 LB 1.00 Hz  
 GB 0  
 PC 1.40

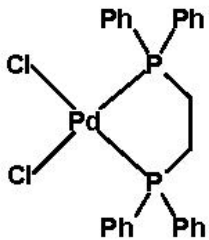

7.87  
7.60  
7.53

2.49  
2.43

1.52

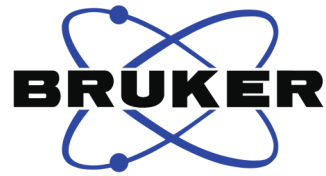

Current Data Parameters  
 NAME Pd(dppf)Cl2  
 EXPNO 60  
 PROCNO 1

F2 - Acquisition Parameters  
 Date\_ 20150324  
 Time 10.37  
 INSTRUM av400  
 PROBHD 5 mm PABBO BB/  
 PULPROG zg30  
 TD 52882  
 SOLVENT CD2Cl2  
 NS 40  
 DS 0  
 SWH 8012.820 Hz  
 FIDRES 0.151523 Hz  
 AQ 3.2998369 sec  
 RG 155.85  
 DW 62.400 usec  
 DE 6.50 usec  
 TE 299.0 K  
 D1 2.00000000 sec  
 TD0 1

==== CHANNEL f1 =====  
 SFO1 400.1324008 MHz  
 NUC1 1H  
 P1 15.00 usec  
 PLW1 13.00000000 W

F2 - Processing parameters  
 SI 65536  
 SF 400.1300155 MHz  
 WDW EM  
 SSB 0  
 LB 0.30 Hz  
 GB 0  
 PC 1.00

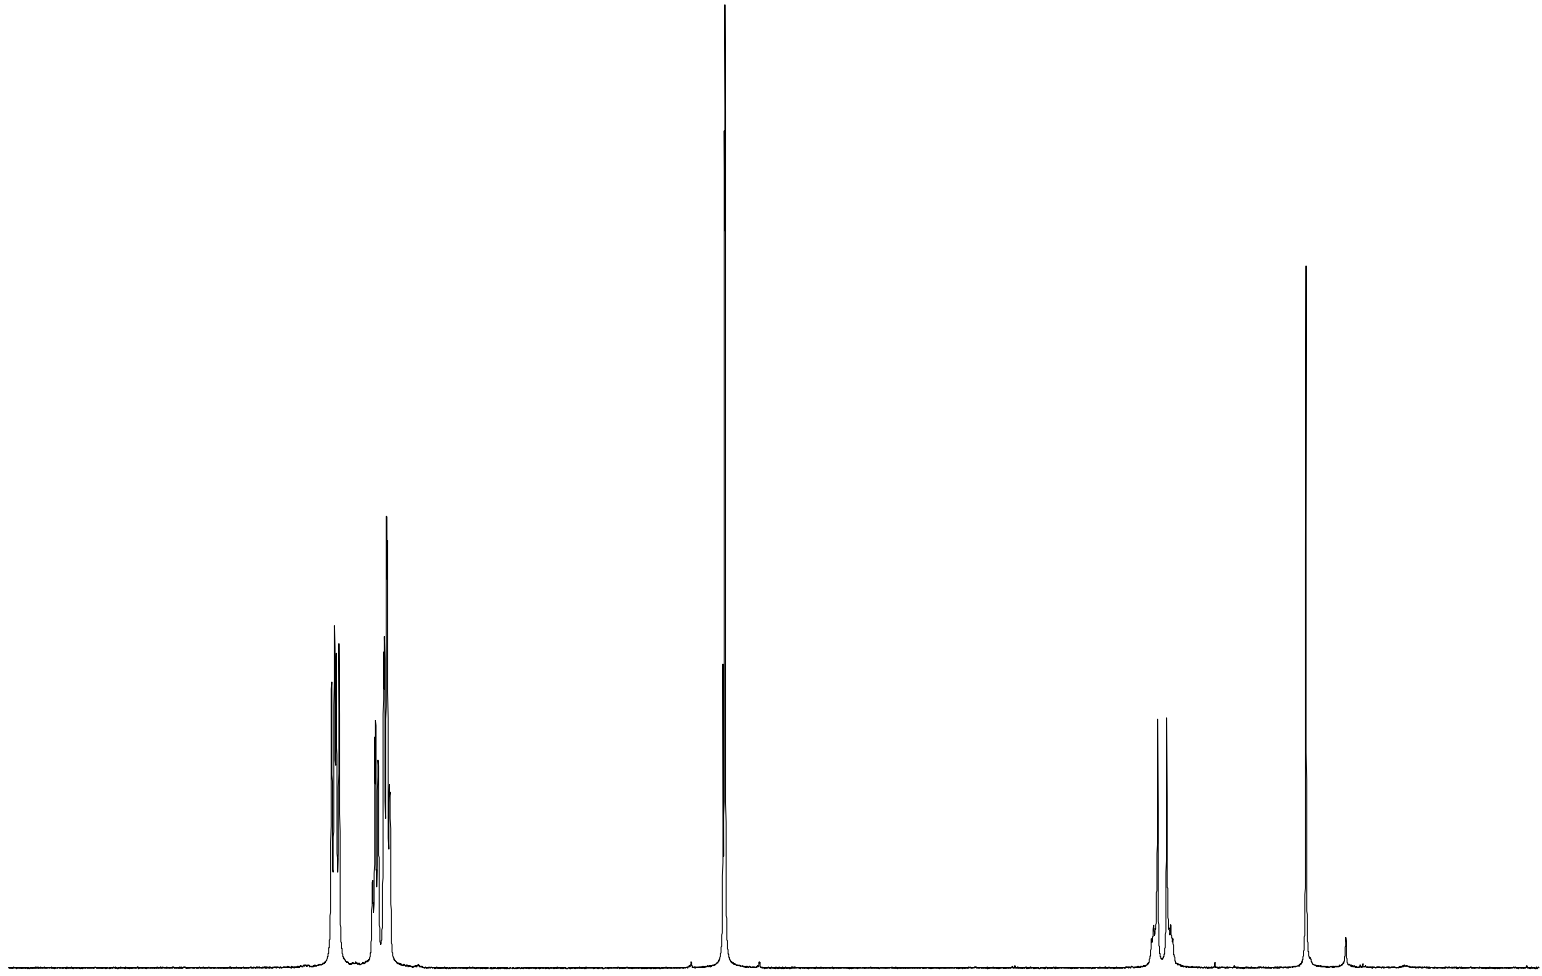

7.97  
4.05  
8.00

4.07

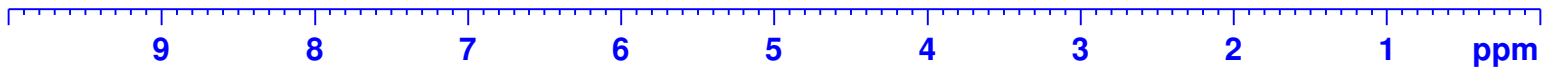

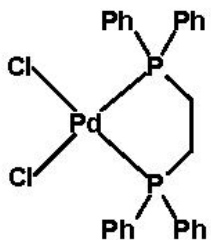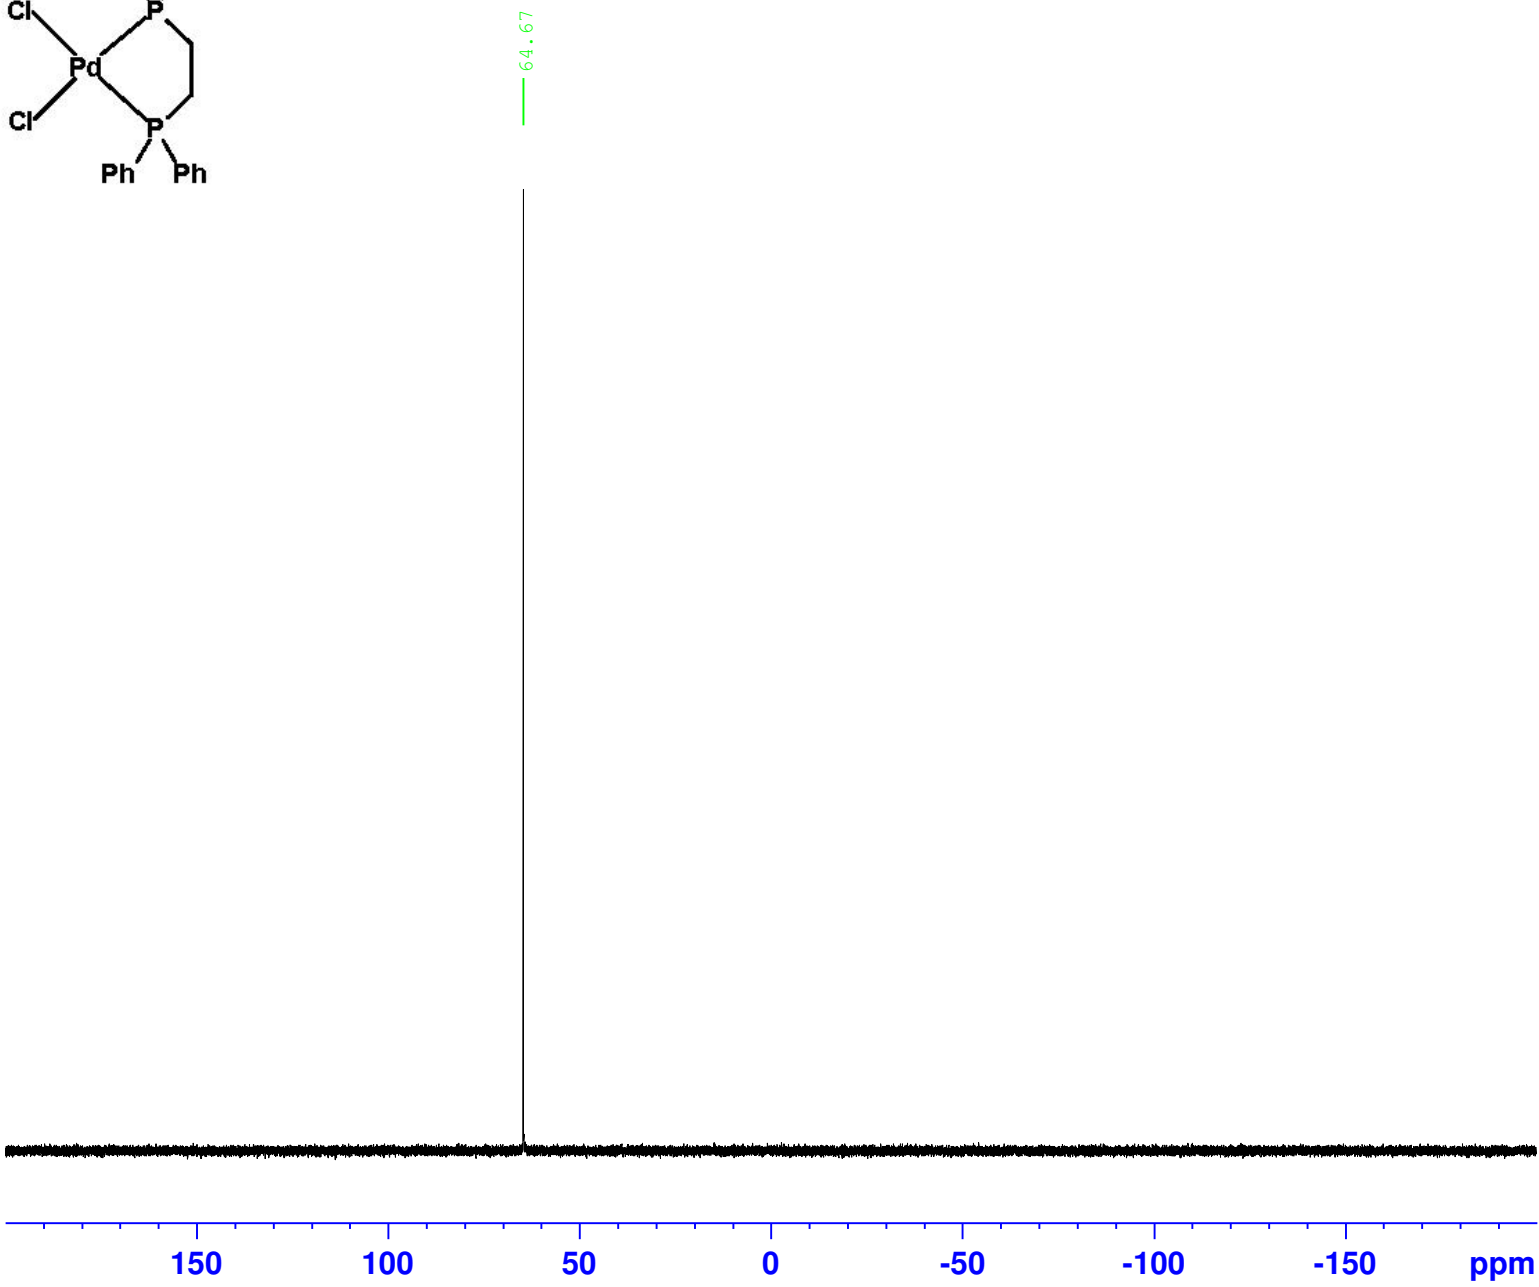

Current Data Parameters  
 NAME Pd(dppe)Cl2  
 EXPNO 61  
 PROCNO 1

F2 - Acquisition Parameters  
 Date\_ 20150324  
 Time 10.42  
 INSTRUM av400  
 PROBHD 5 mm PABBO BB/  
 PULPROG zgpg30  
 TD 262144  
 SOLVENT CD2Cl2  
 NS 64  
 DS 0  
 SWH 131578.953 Hz  
 FIDRES 0.501934 Hz  
 AQ 0.9961472 sec  
 RG 189.85  
 DW 3.800 usec  
 DE 6.50 usec  
 TE 299.0 K  
 D1 2.00000000 sec  
 D11 0.03000000 sec  
 TD0 1

==== CHANNEL f1 =====  
 SFO1 161.9755930 MHz  
 NUC1 31P  
 P1 14.00 usec  
 PLW1 12.00000000 W

==== CHANNEL f2 =====  
 SFO2 400.1324008 MHz  
 NUC2 1H  
 CPDPRG[2] waltz16  
 PCPD2 90.00 usec  
 PLW2 13.00000000 W  
 PLW12 0.36111000 W  
 PLW13 0.29249999 W

F2 - Processing parameters  
 SI 262144  
 SF 161.9755930 MHz  
 WDW EM  
 SSB 0  
 LB 1.00 Hz  
 GB 0  
 PC 1.40

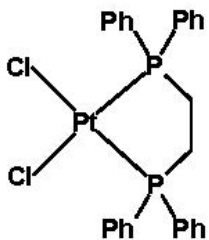

7.86  
7.56  
7.52

2.38  
2.33



Current Data Parameters  
 NAME Pt (dppf)Cl2  
 EXPNO 50  
 PROCNO 1

F2 - Acquisition Parameters  
 Date\_ 20150324  
 Time 10.25  
 INSTRUM av400  
 PROBHD 5 mm PABBO BB/  
 PULPROG zg30  
 TD 52882  
 SOLVENT CD2Cl2  
 NS 40  
 DS 0  
 SWH 8012.820 Hz  
 FIDRES 0.151523 Hz  
 AQ 3.2998369 sec  
 RG 189.85  
 DW 62.400 usec  
 DE 6.50 usec  
 TE 299.0 K  
 D1 2.00000000 sec  
 TD0 1

==== CHANNEL f1 =====  
 SFO1 400.1324008 MHz  
 NUC1 1H  
 P1 15.00 usec  
 PLW1 13.00000000 W

F2 - Processing parameters  
 SI 65536  
 SF 400.1300153 MHz  
 WDW EM  
 SSB 0  
 LB 0.30 Hz  
 GB 0  
 PC 1.00

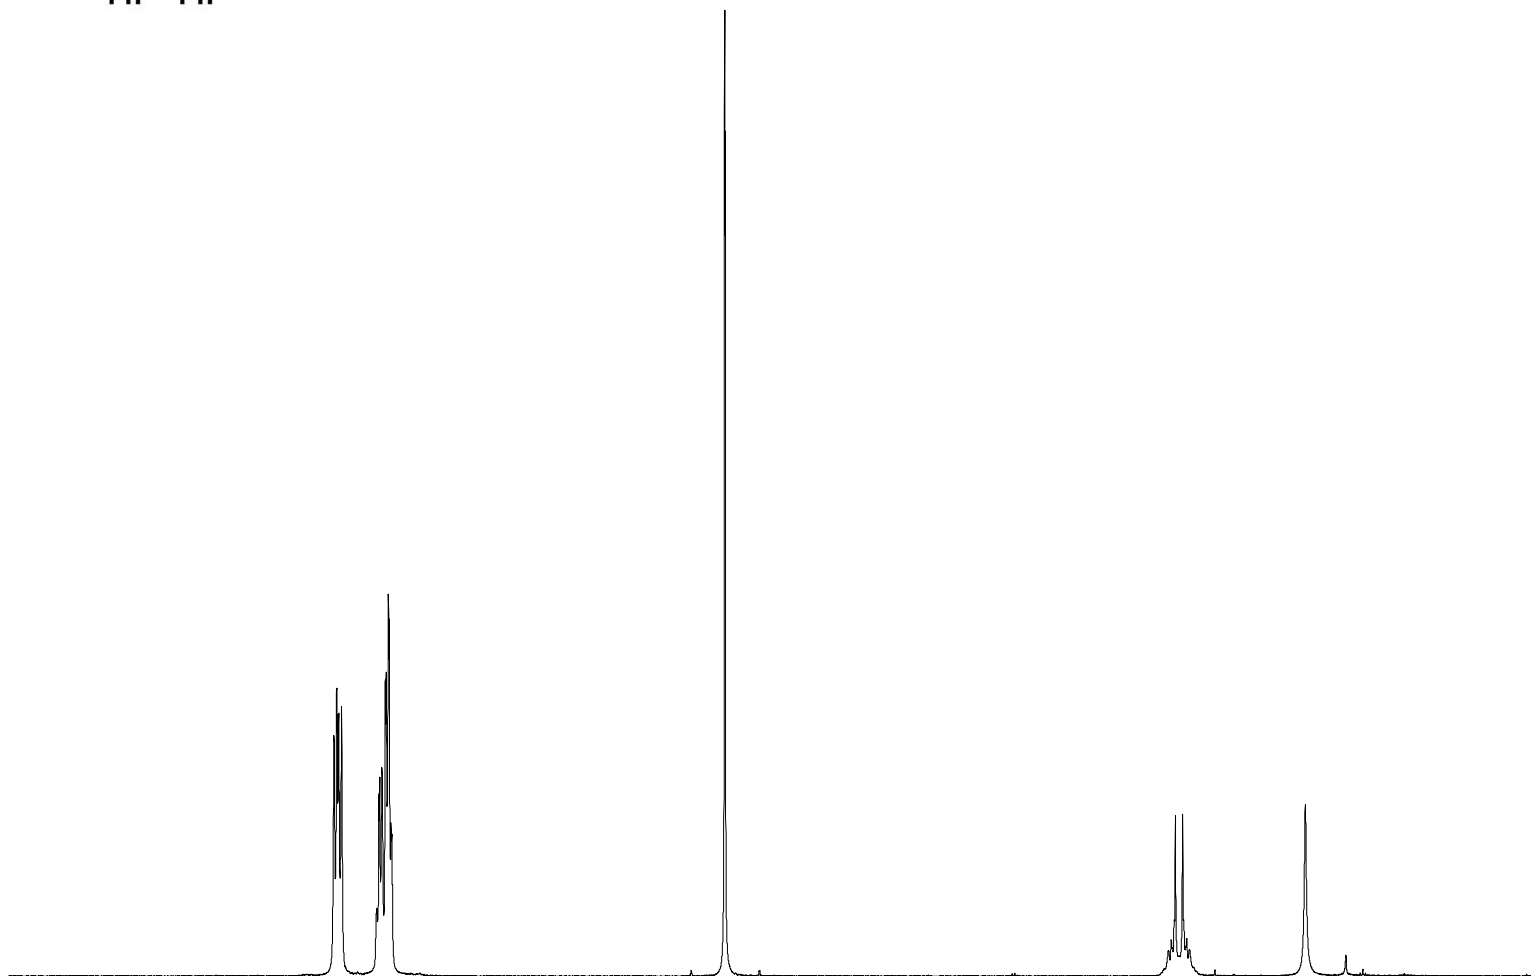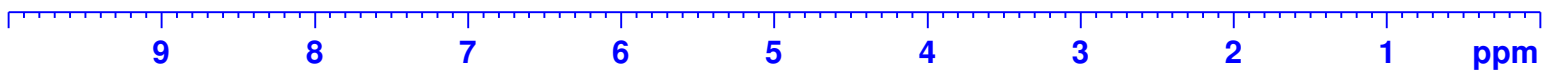

8.00  
4.10  
7.95

4.07

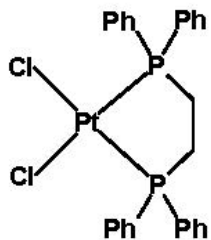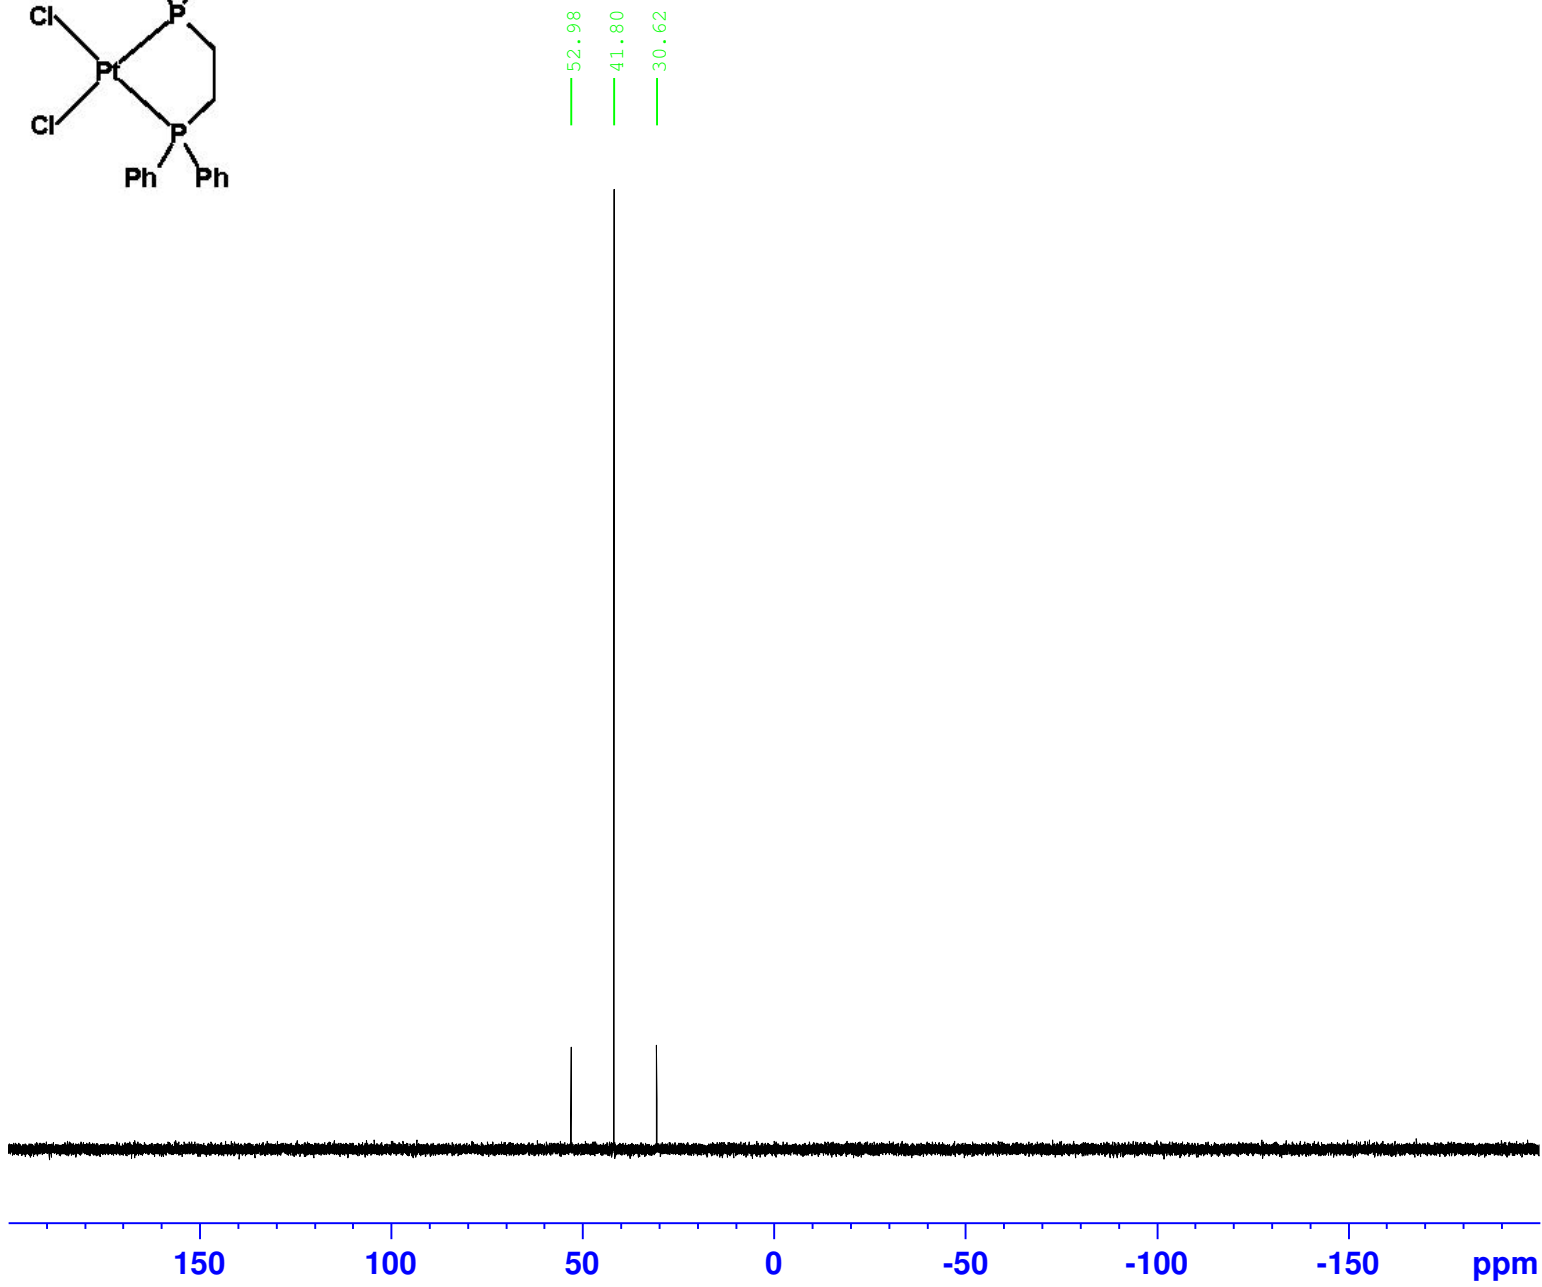

Current Data Parameters  
 NAME Pt (dppf)Cl2  
 EXPNO 51  
 PROCNO 1

F2 - Acquisition Parameters  
 Date\_ 20150324  
 Time 10.29  
 INSTRUM av400  
 PROBHD 5 mm PABBO BB/  
 PULPROG zgpg30  
 TD 262144  
 SOLVENT CD2Cl2  
 NS 64  
 DS 0  
 SWH 131578.953 Hz  
 FIDRES 0.501934 Hz  
 AQ 0.9961472 sec  
 RG 189.85  
 DW 3.800 usec  
 DE 6.50 usec  
 TE 299.0 K  
 D1 2.0000000 sec  
 D11 0.03000000 sec  
 TD0 1

==== CHANNEL f1 =====  
 SFO1 161.9755930 MHz  
 NUC1 31P  
 P1 14.00 usec  
 PLW1 12.00000000 W

==== CHANNEL f2 =====  
 SFO2 400.1324008 MHz  
 NUC2 1H  
 CPDPRG[2] waltz16  
 PCPD2 90.00 usec  
 PLW2 13.00000000 W  
 PLW12 0.36111000 W  
 PLW13 0.29249999 W

F2 - Processing parameters  
 SI 262144  
 SF 161.9755930 MHz  
 WDW EM  
 SSB 0  
 LB 1.00 Hz  
 GB 0  
 PC 1.40





Current Data Parameters  
NAME Pt (dtb-bpy)Cl<sub>2</sub>, DCM  
EXPNO 10  
PROCNO 1

F2 - Acquisition Parameters

Date\_ 20150801  
Time 15.01  
INSTRUM av400  
PROBHD 5 mm PABBO BB/  
PULPROG zg30  
TD 52882  
SOLVENT CD<sub>2</sub>Cl<sub>2</sub>  
NS 64  
DS 0  
SWH 8012.820 Hz  
FIDRES 0.151523 Hz  
AQ 3.2998369 sec  
RG 155.85  
DW 62.400 usec  
DE 6.50 usec  
TE 299.0 K  
D1 2.00000000 sec  
TD0 1

==== CHANNEL f1 =====  
SFO1 400.1324008 MHz  
NUC1 1H  
P1 15.00 usec  
PLW1 13.00000000 W

F2 - Processing parameters

SI 65536  
SF 400.1300154 MHz  
WDW EM  
SSB 0  
LB 0.30 Hz  
GB 0  
PC 1.00

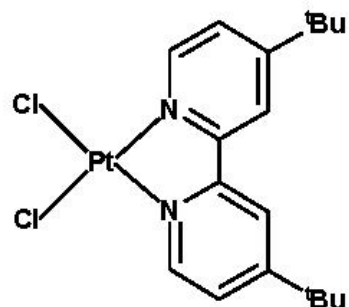

9.50  
9.48

7.92  
7.92  
7.57  
7.57  
7.56  
7.55

1.45

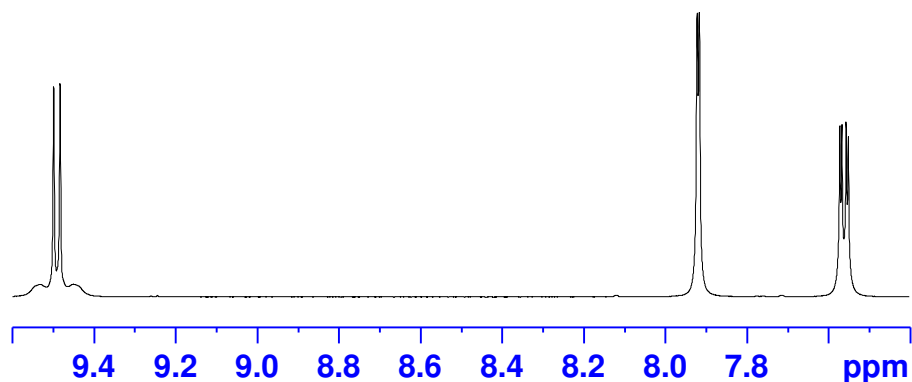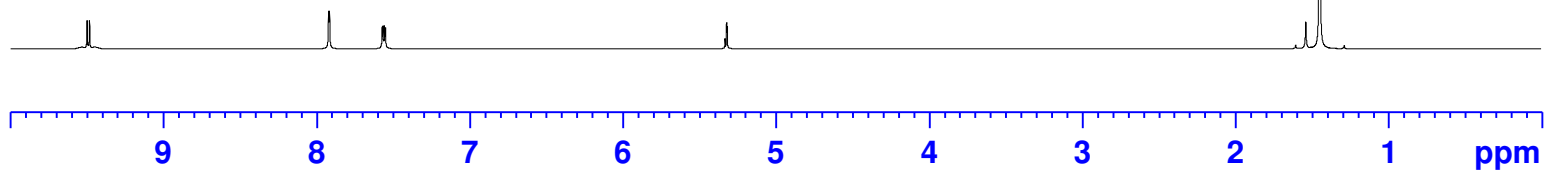

1.92

2.03

2.00

18.02
